# Supplementary material for: Physiological and Transcriptomic Responses of Growth in Neolamarckia cadamba Stimulated by Exogenous Gibberellins
Source: Int J Mol Sci. 2022 Oct 6;23(19):11842. doi: 10.3390/ijms231911842 (PMC9569647; doi:10.3390/ijms231911842)
Supplement: Supplementary file 1 [file ijms-23-11842-s001.zip]

Archive with 12 entries (12 files):
- Supplemental Table S1.xlsx
- Supplemental Table S10.xlsx
- Supplemental Table S11.xlsx
- Supplemental Table S2.xlsx
- Supplemental Table S3.xlsx
- Supplemental Table S4.xlsx
- Supplemental Table S5.xlsx
- Supplemental Table S6.xlsx
- Supplemental Table S7.xlsx
- Supplemental Table S8.xlsx
- Supplemental Table S9.xlsx
- Supplementary Figure.pdf
