# Supplementary material for: Physiological and Transcriptomic Responses of Growth in Neolamarckia cadamba Stimulated by Exogenous Gibberellins
Source: Int J Mol Sci. 2022 Oct 6;23(19):11842. doi: 10.3390/ijms231911842 (PMC9569647; doi:10.3390/ijms231911842)
Supplement: Supplementary file 1 [file ijms-23-11842-s001.zip › Supplemental Table S1.xlsx]

## Sheet: Supplemental Table S1
Supplemental Table S1. RNA-Seq sample information.
sample	library	raw_reads	clean_reads	clean_bases	error_rate	Q20	Q30	GC_pct
CK14d_1	FRAS210146554-1r	41218452	39224412	5.88G	0.03	97.41	92.93	43.74
CK14d_2	FRAS210146555-1r	44645624	42210098	6.33G	0.03	97.67	93.47	43.8
CK14d_3	FRAS210146556-1r	46712564	42532302	6.38G	0.03	97.57	93.24	43.22
CK1d_1	FRAS210146536-1r	44312180	41776768	6.27G	0.03	97.79	93.74	43.01
CK1d_2	FRAS210146537-1r	50423384	49018046	7.35G	0.03	97.43	92.98	43.12
CK1d_3	FRAS210146538-1r	42760816	41513390	6.23G	0.03	97.82	93.83	43.77
CK3d_1	FRAS210146542-1r	45609132	43159602	6.47G	0.03	97.63	93.4	43.31
CK3d_2	FRAS210146543-1r	44136396	40735794	6.11G	0.03	97.84	93.89	43.08
CK3d_3	FRAS210146544-1r	45364642	42774762	6.42G	0.03	97.91	94.03	43.59
CK7d_1	FRAS210146548-1r	44586010	42888714	6.43G	0.03	97.77	93.74	43.38
CK7d_2	FRAS210146549-1r	44637882	42932858	6.44G	0.03	97.55	93.25	43.53
CK7d_3	FRAS210146550-1r	45340086	43645398	6.55G	0.03	97.64	93.44	43.72
GA14d_1	FRAS210146557-1r	46174924	44218744	6.63G	0.03	97.42	92.9	43.38
GA14d_2	FRAS210146558-1r	44106022	42405802	6.36G	0.03	97.82	93.79	43.15
GA14d_3	FRAS210146559-1r	44047244	41823086	6.27G	0.03	97.73	93.6	43
GA1d_1	FRAS210146539-1r	43345648	40621864	6.09G	0.03	97.66	93.51	43.32
GA1d_2	FRAS210146540-1r	44631252	43131936	6.47G	0.03	97.64	93.41	43.78
GA1d_3	FRAS210146541-1r	42502560	40898800	6.13G	0.03	97.58	93.25	43.65
GA3d_1	FRAS210146545-1r	42679594	40181416	6.03G	0.03	97.56	93.24	43.36
GA3d_2	FRAS210146546-1r	44395644	41740944	6.26G	0.03	97.77	93.78	43.63
GA3d_3	FRAS210146547-1r	44410740	41505984	6.23G	0.03	97.64	93.43	43.38
GA7d_1	FRAS210146551-1r	45073728	43326412	6.5G	0.03	97.56	93.24	43.59
GA7d_2	FRAS210146552-1r	44743910	43223584	6.48G	0.03	97.62	93.36	43.67
GA7d_3	FRAS210146553-1r	42774010	40901090	6.14G	0.03	97.88	93.92	43.29
