# Supplementary material for: Physiological and Transcriptomic Responses of Growth in Neolamarckia cadamba Stimulated by Exogenous Gibberellins
Source: Int J Mol Sci. 2022 Oct 6;23(19):11842. doi: 10.3390/ijms231911842 (PMC9569647; doi:10.3390/ijms231911842)
Supplement: Supplementary file 1 [file ijms-23-11842-s001.zip › Supplemental Table S2.xlsx]

## Sheet: Sheet1
Supplemental Table S2. RNA-Seq data of cell enlongation
gene_id	CK14d_1_count	CK14d_2_count	CK14d_3_count	CK1d_1_count	CK1d_2_count	CK1d_3_count	CK3d_1_count	CK3d_2_count	CK3d_3_count	CK7d_1_count	CK7d_2_count	CK7d_3_count	GA14d_1_count	GA14d_2_count	GA14d_3_count	GA1d_1_count	GA1d_2_count	GA1d_3_count	GA3d_1_count	GA3d_2_count	GA3d_3_count	GA7d_1_count	GA7d_2_count	GA7d_3_count	CK14d_1_fpkm	CK14d_2_fpkm	CK14d_3_fpkm	CK1d_1_fpkm	CK1d_2_fpkm	CK1d_3_fpkm	CK3d_1_fpkm	CK3d_2_fpkm	CK3d_3_fpkm	CK7d_1_fpkm	CK7d_2_fpkm	CK7d_3_fpkm	GA14d_1_fpkm	GA14d_2_fpkm	GA14d_3_fpkm	GA1d_1_fpkm	GA1d_2_fpkm	GA1d_3_fpkm	GA3d_1_fpkm	GA3d_2_fpkm	GA3d_3_fpkm	GA7d_1_fpkm	GA7d_2_fpkm	GA7d_3_fpkm	GA14dvsCK14d_GA14d
evm.TU.Contig555.524	630	732	491	1089	1326	285	664	383	611	756	812	1297	1767	1222	1651	630	1049	865	930	898	546	955	938	594	29.7732	31.5784	21.1531	43.9505	45.3472	13.9372	25.5262	16.2439	24.3702	32.1563	33.9509	52.1067	71.0448	52.4448	72.0092	26.3826	43.4108	35.5735	40.2236	38.7026	23.3816	40.4784	39.3617	26.1217	1494.43
evm.TU.Contig54.415	600	744	852	385	1081	236	536	665	693	630	448	561	635	149	407	386	620	587	475	1288	553	612	533	536	29.0379	32.8686	37.589	15.912	37.8584	11.8187	21.1014	28.883	28.3062	27.4419	19.1824	23.0806	26.1456	6.54858	18.1788	16.5537	26.275	24.7217	21.0388	56.8472	24.2513	26.5644	22.9048	24.1385	380.194
evm.TU.Contig154.647	313	459	304	170	216	119	343	287	543	350	204	415	566	331	735	235	246	190	557	392	344	455	608	508	11.2993	15.1256	10.0043	5.2409	5.64264	4.44527	10.0724	9.29811	16.544	11.3719	6.51549	12.7357	17.3834	10.8513	24.4878	7.51738	7.7764	5.96877	18.4024	12.9054	11.2528	14.7317	19.4893	17.0648	528.927
evm.TU.Contig184.573	223	281	233	209	303	121	315	210	264	238	230	247	718	798	473	261	252	247	370	274	317	231	300	255	5.8507	6.72983	5.5727	4.68274	5.75265	3.28498	6.72274	4.94457	5.84575	5.62004	5.33878	5.50895	16.0265	19.0131	11.453	6.06787	5.7895	5.6393	8.8842	6.5559	7.53631	5.43563	6.98892	6.2255	637.735
evm.TU.Contig12.423	176	276	301	99	185	117	180	135	163	198	172	242	396	175	326	98	144	128	293	315	193	184	193	244	5.75833	8.24304	8.97754	2.76611	4.38004	3.96109	4.79059	3.96391	4.50096	5.83053	4.97878	6.73083	11.0227	5.19959	9.84369	2.8412	4.12557	3.64434	8.77334	9.39882	5.72186	5.39929	5.60695	7.42856	288.063
evm.TU.Contig166.1	160	325	242	63	75	80	390	227	245	317	115	164	289	136	235	137	361	164	258	159	240	203	162	177	4.83217	8.95983	6.66261	1.62485	1.6391	2.5001	9.58118	6.15253	6.24484	8.61668	3.07277	4.21051	7.42558	3.72999	6.55007	3.66636	9.54699	4.31013	7.13107	4.37923	6.56794	5.49861	4.34433	4.97423	211.92
evm.TU.Contig969.62	34	53	32	21	26	17	24	30	26	40	31	47	54	32	51	79	48	37	48	26	60	73	33	32	1.02684	1.46114	0.881006	0.541617	0.568221	0.53127	0.589611	0.81311	0.662718	1.08728	0.828313	1.20667	1.38748	0.877644	1.4215	2.11418	1.26941	0.972408	1.32671	0.7161	1.64199	1.97733	0.884956	0.899296	44.1268
evm.TU.Contig161.87	43	53	42	24	43	29	60	22	32	78	51	46	40	8	19	32	47	59	24	8	20	36	32	23	1.51039	1.69938	1.34486	0.719916	1.09298	1.05405	1.71437	0.693504	0.948645	2.46589	1.5849	1.37356	1.19534	0.255186	0.615928	0.996007	1.44562	1.80342	0.771515	0.256265	0.63657	1.13412	0.998058	0.751759	21.2548
evm.TU.Contig66.420	4167	5702	5342	5051	5072	4197	4131	6176	5169	6480	4646	5266	6665	4083	9627	5155	6828	4909	5660	6035	7034	4940	5621	6525	156.384	195.34	182.76	161.882	137.744	162.987	126.112	208.01	163.723	218.879	154.262	168.004	212.804	139.154	333.439	171.432	224.388	160.32	194.401	206.55	239.204	166.277	187.313	227.867	6617.27
evm.TU.Contig52.64	67	111	193	59	110	57	142	106	65	88	71	72	283	271	143	94	60	94	200	41	86	78	23	98	2.43726	3.68591	6.40017	1.83286	2.89562	2.14559	4.20192	3.4605	1.9956	2.88117	2.28505	2.22653	8.75839	8.95247	4.80086	3.03003	1.91124	2.97564	6.65841	1.36016	2.8348	2.54482	0.742917	3.31729	222.591
evm.TU.Contig66.1257	0	0	0	0	0	0	0	0	0	0	0	0	0	0	0	0	0	0	0	0	0	0	0	0	0	0	0	0	0	0	0	0	0	0	0	0	0	0	0	0	0	0	0	0	0	0	0	0	NA
evm.TU.Contig956.2	0	0	0	0	0	0	0	0	0	0	0	0	0	0	0	0	0	0	0	0	0	0	0	0	0	0	0	0	0	0	0	0	0	0	0	0	0	0	0	0	0	0	0	0	0	0	0	0	NA
[truncated: 28 more columns]
