# Supplementary material for: Physiological and Transcriptomic Responses of Growth in Neolamarckia cadamba Stimulated by Exogenous Gibberellins
Source: Int J Mol Sci. 2022 Oct 6;23(19):11842. doi: 10.3390/ijms231911842 (PMC9569647; doi:10.3390/ijms231911842)
Supplement: Supplementary file 1 [file ijms-23-11842-s001.zip › Supplemental Table S3.xlsx]

## Sheet: Sheet1
Supplemental Table S3. RNA-Seq data in gibberellin biosynthesis pathway
gene_id	CK14d_1_count	CK14d_2_count	CK14d_3_count	CK1d_1_count	CK1d_2_count	CK1d_3_count	CK3d_1_count	CK3d_2_count	CK3d_3_count	CK7d_1_count	CK7d_2_count	CK7d_3_count	GA14d_1_count	GA14d_2_count	GA14d_3_count	GA1d_1_count	GA1d_2_count	GA1d_3_count	GA3d_1_count	GA3d_2_count	GA3d_3_count	GA7d_1_count	GA7d_2_count	GA7d_3_count	CK14d_1_fpkm	CK14d_2_fpkm	CK14d_3_fpkm	CK1d_1_fpkm	CK1d_2_fpkm	CK1d_3_fpkm	CK3d_1_fpkm	CK3d_2_fpkm	CK3d_3_fpkm	CK7d_1_fpkm	CK7d_2_fpkm	CK7d_3_fpkm	GA14d_1_fpkm	GA14d_2_fpkm	GA14d_3_fpkm	GA1d_1_fpkm	GA1d_2_fpkm	GA1d_3_fpkm	GA3d_1_fpkm	GA3d_2_fpkm	GA3d_3_fpkm	GA7d_1_fpkm	GA7d_2_fpkm	GA7d_3_fpkm	GA14dvsCK14d_GA14d
evm.TU.Contig69.93	368	357	280	161	200	169	244	329	294	349	174	148	198	154	260	164	293	251	211	106	141	294	152	244	26.5695	23.5288	18.429	9.92689	10.4493	12.6261	14.3304	21.3176	17.915	22.6788	11.1147	9.08379	12.1622	10.0973	17.3247	10.4923	18.5243	15.7701	13.9422	6.97945	9.22469	19.0379	9.74464	16.393	198.358
evm.TU.Contig421.375	1301	1029	1569	698	1925	341	1338	1353	1069	1292	1019	727	248	99	85	678	957	1020	302	564	307	874	332	439	29.0749	20.9919	31.9648	13.3213	31.1311	7.88571	24.3237	27.136	20.1629	25.9874	20.1478	13.8116	4.71524	2.0092	1.75314	13.4265	18.728	19.8366	6.17678	11.4947	6.21694	17.5181	6.58818	9.12929	136.649
evm.TU.Contig421.376	18	5	7	2	19	1	7	8	5	47	4	6	0	0	2	6	10	16	1	2	2	7	1	1	0.518823	0.131556	0.18393	0.0492297	0.396299	0.0298257	0.164126	0.206939	0.121633	1.21928	0.102004	0.147017	0	0	0.0532026	0.153246	0.252397	0.401321	0.0263791	0.0525721	0.0522364	0.180959	0.0255937	0.0268212	0.676869
evm.TU.Contig69.102	0	0	0	11	22	3	3	0	0	1	15	5	0	0	0	11	0	3	1	5	7	0	3	1	0	0	0	0.291806	0.494533	0.096431	0.0758062	0	0	0.0279582	0.412242	0.132035	0	0	0	0.302786	0	0.0810955	0.0284292	0.141644	0.197036	0	0.082748	0.0289056	NA
evm.TU.Contig294.414	2	0	0	0	0	0	0	0	0	0	0	0	0	1	0	0	0	2	0	0	0	0	0	0	0.0809167	0	0	0	0	0	0	0	0	0	0	0	0	0.0367413	0	0	0	0.0704147	0	0	0	0	0	0	0.323283
evm.TU.Contig341.423	53	82	88	32	79	11	123	79	160	116	44	118	38	7	47	54	81	44	95	40	54	121	61	79	1.31857	1.86225	1.99581	0.679876	1.42226	0.283182	2.48924	1.76385	3.35956	2.59744	0.968484	2.49563	0.804309	0.158152	1.07915	1.19046	1.76462	0.952591	2.16305	0.907544	1.21736	2.69991	1.34755	1.82889	29.7957
novel.2133	550	495	449	456	695	281	630	505	523	649	371	422	266	239	362	552	585	556	340	324	196	560	423	526	5.86146	4.81551	4.3621	4.1501	5.35982	3.0988	5.46155	4.82993	4.70412	6.2251	3.49806	3.82318	2.41177	2.31306	3.56047	5.21284	5.45929	5.15635	3.31616	3.14896	1.89276	5.35261	4.00285	5.21626	281.162
evm.TU.Contig16.39	0	0	0	0	0	0	0	0	0	0	0	0	0	0	0	0	0	0	0	0	0	0	0	0	0	0	0	0	0	0	0	0	0	0	0	0	0	0	0	0	0	0	0	0	0	0	0	0	NA
evm.TU.Contig333.12	452	400	453	677	505	636	292	235	305	440	411	434	654	620	500	297	249	310	329	249	469	389	450	458	12.3725	9.99479	11.3038	15.8256	10.0031	18.0145	6.50182	5.77289	7.04616	10.84	9.95341	10.099	15.2303	15.412	12.6312	7.20391	5.96837	7.38424	8.24192	6.2158	11.6329	9.55001	10.9375	11.6658	569.748
evm.TU.Contig277.12	0	0	0	0	0	0	0	0	0	0	1	0	0	0	0	0	0	0	0	0	0	0	0	0	0	0	0	0	0	0	0	0	0	0	0.0233506	0	0	0	0	0	0	0	0	0	0	0	0	0	NA
evm.TU.Contig917.38	564	465	466	650	511	799	198	291	351	637	472	416	747	936	624	229	202	294	310	202	440	482	369	569	15.4383	11.6189	11.6282	15.1944	10.1219	22.6314	4.40877	7.14856	8.10886	15.6934	11.4307	9.68014	17.396	23.2671	15.7638	5.55453	4.84181	7.00312	7.76594	5.04254	10.9136	11.8332	8.96874	14.4931	742.325
evm.TU.Contig69.98_evm.TU.Contig69.99	442	364	697	703	1083	311	565	968	454	485	717	497	693	645	445	531	334	453	594	849	730	426	338	469	10.5305	7.91631	15.1379	14.3032	18.6714	7.66711	10.9498	20.697	9.12885	10.3999	15.1132	10.0659	14.0466	13.9551	9.7846	11.2102	6.96804	9.39183	12.9517	18.4465	15.7596	9.10272	7.15038	10.3975	571.148
evm.TU.Contig333.12	452	400	453	677	505	636	292	235	305	440	411	434	654	620	500	297	249	310	329	249	469	389	450	458	12.3725	9.99479	11.3038	15.8256	10.0031	18.0145	6.50182	5.77289	7.04616	10.84	9.95341	10.099	15.2303	15.412	12.6312	7.20391	5.96837	7.38424	8.24192	6.2158	11.6329	9.55001	10.9375	11.6658	569.748
evm.TU.Contig117.82	16	35	21	7	8	2	18	18	29	10	0	42	23	23	76	18	9	8	11	38	18	12	26	14	0.420446	0.839563	0.503056	0.157087	0.152126	0.0543833	0.384765	0.424492	0.643165	0.23651	0	0.938229	0.514196	0.548864	1.84315	0.419136	0.207095	0.182939	0.264543	0.910653	0.428607	0.282818	0.606666	0.342334	40.1935
evm.TU.Contig555.344	198	174	308	530	765	181	245	549	193	216	334	285	315	287	228	339	158	328	235	374	509	173	216	171	5.89131	4.72597	8.3542	13.4671	16.4714	5.57276	5.92988	14.6597	4.84661	5.78442	8.79234	7.20877	7.97385	7.75489	6.26092	8.93797	4.11663	8.4927	6.39924	10.1484	13.7234	4.61666	5.70672	4.7345	266.321
evm.TU.Contig14.60	245	292	213	201	361	238	207	224	363	345	315	361	265	142	371	298	381	362	324	340	330	445	456	353	7.80421	8.49063	6.18513	5.46776	8.32132	7.84484	5.36371	6.40349	9.75894	9.89101	8.87736	9.7755	7.18157	4.10769	10.9067	8.41146	10.6273	10.0345	9.44541	9.87689	9.52517	12.7133	12.8977	10.4633	252.544
evm.TU.Contig797.34	1555	1604	1303	100	627	43	2721	1327	3070	1685	759	2470	1278	126	1083	852	3510	2757	2115	2420	2096	2067	2938	1770	68.7846	64.7678	52.5427	3.77756	20.0701	1.96822	97.9088	52.679	114.613	67.0841	29.7039	92.8809	48.0953	5.06148	44.2125	33.3959	135.958	106.126	85.6218	97.6236	84.0133	82.0042	115.398	72.8559	798.27
evm.TU.Contig51.77	37	36	67	70	67	31	40	39	58	48	32	54	45	48	24	63	65	61	44	24	47	40	44	72	1.32919	1.18054	2.19415	2.1475	1.74174	1.15237	1.1689	1.25735	1.75852	1.55198	1.01706	1.6491	1.37533	1.56593	0.795706	2.00548	2.04473	1.90695	1.44661	0.786276	1.52996	1.28878	1.40354	2.40685	37.408
evm.TU.Contig51.78	895	1197	831	155	303	87	621	361	942	948	460	661	219	92	398	250	632	533	597	479	549	837	1019	677	24.9726	30.488	21.1372	3.69337	6.11794	2.51191	14.095	9.03969	22.1832	23.8071	11.3556	15.6787	5.1987	2.33117	10.249	6.18119	15.4417	12.9417	15.245	12.1886	13.8806	20.946	25.2464	17.5776	231.443
evm.TU.Contig969.25	17	11	3	0	12	0	7	1	5	7	3	8	12	1	40	0	10	2	1	2	2	0	7	5	0.775776	0.458221	0.1248	0	0.39627	0	0.259847	0.0409538	0.192571	0.287504	0.121121	0.310346	0.465886	0.0414414	1.68463	0	0.399599	0.0794223	0.0417639	0.0832331	0.0827016	0	0.283642	0.212319	17.5321
evm.TU.Contig184.687	10040	12961	15584	4723	14917	9409	8856	13922	14208	7291	11410	10660	46128	34883	16655	17677	13886	3743	28846	38277	35797	17099	14398	35211	298.731	352.03	422.701	120.01	321.182	289.691	214.347	371.753	356.791	195.251	300.361	269.633	1167.68	942.557	457.349	466.067	361.794	96.9152	785.5	1038.64	965.139	456.302	380.395	974.892	31026.8
evm.TU.Contig184.687	10040	12961	15584	4723	14917	9409	8856	13922	14208	7291	11410	10660	46128	34883	16655	17677	13886	3743	28846	38277	35797	17099	14398	35211	298.731	352.03	422.701	120.01	321.182	289.691	214.347	371.753	356.791	195.251	300.361	269.633	1167.68	942.557	457.349	466.067	361.794	96.9152	785.5	1038.64	965.139	456.302	380.395	974.892	31026.8
evm.TU.Contig208.88	23	17	12	107	255	447	9	34	19	15	69	44	801	441	2373	343	67	113	525	208	502	207	518	1036	1.11231	0.750484	0.529037	4.41909	8.92402	22.3692	0.354057	1.47565	0.775506	0.652902	2.95228	1.80892	32.9565	19.3679	105.914	14.6989	2.83733	4.75556	23.2365	9.1736	21.9987	8.97848	22.244	46.6217	1190.74
evm.TU.Contig188.42	48	93	91	446	273	1108	318	250	419	235	199	377	147	87	285	390	650	491	330	514	888	283	265	335	2.67637	4.7335	4.62544	21.2369	11.0151	63.9278	14.4233	12.5098	19.7175	11.7932	9.81678	17.8696	6.97321	4.40525	14.6658	19.2691	31.7363	23.8238	16.8396	26.1365	44.8657	14.1523	13.1201	17.3812	169.555
evm.TU.Contig341.656	26	49	49	58	23	11	34	27	66	28	36	38	31	86	37	51	43	29	63	45	57	30	11	34	1.24829	2.14751	2.1446	2.37806	0.799087	0.546489	1.32787	1.16336	2.67437	1.20993	1.52917	1.55095	1.26624	3.74964	1.63946	2.16973	1.8078	1.21162	2.7682	1.97031	2.47979	1.29181	0.468945	1.51899	49.809
evm.TU.Contig421.600	13	41	30	28	21	53	27	9	26	42	23	70	49	81	174	72	75	43	78	44	61	74	135	98	0.816829	2.35162	1.71837	1.50244	0.954838	3.44595	1.38002	0.507501	1.37878	2.37518	1.27858	3.739	2.61936	4.62189	10.0901	4.00879	4.12655	2.35116	4.48535	2.52127	3.47307	4.17018	7.53195	5.72987	100.065
evm.TU.Contig341.656	26	49	49	58	23	11	34	27	66	28	36	38	31	86	37	51	43	29	63	45	57	30	11	34	1.24829	2.14751	2.1446	2.37806	0.799087	0.546489	1.32787	1.16336	2.67437	1.20993	1.52917	1.55095	1.26624	3.74964	1.63946	2.16973	1.8078	1.21162	2.7682	1.97031	2.47979	1.29181	0.468945	1.51899	49.809
evm.TU.Contig437.87	0	0	0	0	0	0	0	0	0	1	0	0	0	0	0	0	0	0	0	0	0	0	0	0	0	0	0	0	0	0	0	0	0	0.0594217	0	0	0	0	0	0	0	0	0	0	0	0	0	0	NA
evm.TU.Contig96.100	114	108	142	49	91	28	126	46	117	110	145	152	120	102	64	42	82	97	81	81	32	94	118	88	6.52639	5.644	7.41078	2.39561	3.76992	1.65871	5.86775	2.36337	5.65312	5.66787	7.34425	7.39743	5.84468	5.30292	3.38146	2.13064	4.11074	4.83243	4.24392	4.22895	1.66003	4.82649	5.99841	4.68794	91.3494
evm.TU.Contig394.79	80	114	217	111	96	107	362	295	182	347	197	104	36	76	78	102	106	131	86	179	201	139	35	68	0.856289	1.11386	2.11737	1.01462	0.743573	1.18511	3.15189	2.83373	1.64413	3.34286	1.86555	0.946308	0.327826	0.738738	0.770515	0.967437	0.993513	1.22019	0.842446	1.74728	1.9495	1.33438	0.332647	0.677283	61.9818
evm.TU.Contig271.154	106	80	106	87	156	92	27	63	67	90	100	86	117	303	74	46	41	76	55	23	46	56	46	52	3.89009	2.68002	3.54622	2.72661	4.14286	3.4937	0.806027	2.07492	2.07521	2.97273	3.24687	2.683	3.653	10.0982	2.50635	1.4959	1.31757	2.42713	1.84727	0.769768	1.5297	1.84322	1.49898	1.77577	158.796
evm.TU.Contig35.20	2140	1528	2444	3398	4097	4836	1703	1188	2879	2678	4293	3717	9830	6171	13814	3633	2132	2098	5935	4303	2929	8845	7958	15907	69.8782	45.5456	72.7506	94.7551	96.8092	163.403	45.2351	34.8138	79.3421	78.7042	124.022	103.179	273.082	182.991	416.298	105.12	60.9611	59.6154	177.363	128.138	86.665	259.036	230.737	483.334	9677.66
evm.TU.Contig271.152	2353	2609	2878	2883	3169	2230	2626	2721	2774	2418	2923	2859	2463	2436	2444	2301	2295	2408	2363	2739	2471	2625	2741	2613	64.6215	65.4069	72.0531	67.6162	62.9796	63.373	58.6654	67.0641	64.2976	59.7682	71.0223	66.748	57.548	60.7546	61.9459	55.9969	55.1919	57.5488	59.3926	68.6002	61.4928	64.6575	66.842	66.7768	2368.22
evm.TU.Contig471.71	312	238	202	68	144	59	171	271	153	180	101	66	12	3	3	45	113	94	72	171	70	46	65	16	14.0256	9.76646	8.27797	2.61051	4.68436	2.74449	6.25308	10.933	5.80484	7.28278	4.01696	2.52219	0.458942	0.122471	0.124464	1.79255	4.44817	3.67721	2.96218	7.01036	2.85141	1.85463	2.59457	0.669293	5.65662
evm.TU.Contig256.161	573	431	959	88	258	47	226	456	341	499	227	404	205	45	244	310	533	557	226	158	186	360	405	369	16.2964	11.1895	24.8635	2.13733	5.30981	1.38318	5.22851	11.6388	8.18512	12.7731	5.71181	9.76759	4.96023	1.16224	6.40447	7.81252	13.274	13.7853	5.88246	4.09801	4.79343	9.18279	10.2277	9.7655	159.847
evm.TU.Contig96.466	159	245	149	17	88	27	69	62	86	190	47	114	4	1	8	46	63	73	40	106	27	56	85	20	18.9067	26.5937	16.1514	1.7263	7.57221	3.3222	6.6742	6.61631	8.63077	20.3344	4.94455	11.5237	0.404658	0.107985	0.877938	4.84694	6.55988	7.5538	4.35302	11.4948	2.90923	5.97229	8.97475	2.21299	4.25458
evm.TU.Contig477.208	45	67	71	113	116	52	128	88	80	61	62	54	61	83	55	66	54	72	70	69	76	65	59	64	1.46796	1.99513	2.11138	3.14797	2.7383	1.75529	3.39659	2.57626	2.20254	1.79098	1.78938	1.49749	1.69294	2.45881	1.65585	1.90782	1.54252	2.04389	2.08984	2.05272	2.24652	1.90173	1.70899	1.94273	64.1097
evm.TU.Contig96.467	141	187	150	14	45	21	33	55	64	264	25	76	9	0	21	19	65	53	53	79	25	44	82	19	16.3274	19.7667	15.8342	1.38445	3.77079	2.51629	3.10845	5.71566	6.25476	27.5144	2.56123	7.48135	0.886646	0	2.24426	1.94959	6.59095	5.3407	5.61677	8.34263	2.62321	4.56967	8.43134	2.0473	9.86073
evm.TU.Contig60.25	3	10	0	141	105	218	28	15	53	12	7	46	13	13	132	39	49	55	22	16	20	12	48	38	0.185859	0.565532	0	7.45989	4.70732	13.9754	1.41108	0.833988	2.77123	0.669118	0.383682	2.42264	0.685199	0.731396	7.54732	2.14101	2.65825	2.96517	1.24738	0.903985	1.12276	0.666774	2.64052	2.19067	52.8534
evm.TU.Contig894.16	0	3	0	0	0	0	0	0	0	0	1	0	2	0	0	0	1	0	1	2	0	0	0	0	0	0.172069	0	0	0	0	0	0	0	0	0.0555903	0	0.106913	0	0	0	0.0550206	0	0.0575044	0.114603	0	0	0	0	0.611912
evm.TU.Contig109.25	0	0	0	0	0	0	1	0	0	0	0	0	0	0	0	0	2	0	0	0	0	0	0	0	0	0	0	0	0	0	0.0341824	0	0	0	0	0	0	0	0	0	0.0735931	0	0	0	0	0	0	0	NA
evm.TU.Contig477.3	1	0	1	0	0	0	0	1	0	0	0	0	0	3	2	0	0	2	0	0	0	0	0	0	0.117645	0	0.107246	0	0	0	0	0.105579	0	0	0	0	0	0.320509	0.21715	0	0	0.204752	0	0	0	0	0	0	1.64672
evm.TU.Contig119.32	0	0	0	0	1	0	0	0	0	0	0	0	0	0	0	0	0	0	0	0	0	0	0	0	0	0	0	0	0.0405872	0	0	0	0	0	0	0	0	0	0	0	0	0	0	0	0	0	0	0	NA
evm.TU.Contig21.173	10	6	5	0	14	5	68	8	27	27	4	4	0	0	2	3	3	5	25	6	9	1	1	1	0.293721	0.160872	0.133879	0	0.297568	0.151967	1.62471	0.210878	0.669319	0.71377	0.103946	0.0998768	0	0	0.0542153	0.0780817	0.0771604	0.1278	0.67203	0.160718	0.239538	0.0263433	0.0260808	0.0273317	0.676869
evm.TU.Contig46.95	9	5	25	12	18	0	56	69	39	20	26	11	3	0	0	8	4	17	47	35	15	8	2	1	0.406235	0.206015	1.02868	0.462559	0.587935	0	2.05615	2.79505	1.48571	0.8125	1.03829	0.422081	0.115204	0	0	0.319976	0.1581	0.667742	1.94154	1.44073	0.613511	0.323862	0.0801586	0.0420016	0.917869
[truncated: 28 more columns]
