# Supplementary material for: Physiological and Transcriptomic Responses of Growth in Neolamarckia cadamba Stimulated by Exogenous Gibberellins
Source: Int J Mol Sci. 2022 Oct 6;23(19):11842. doi: 10.3390/ijms231911842 (PMC9569647; doi:10.3390/ijms231911842)
Supplement: Supplementary file 1 [file ijms-23-11842-s001.zip › Supplemental Table S4.xlsx]

## Sheet: Sheet1
Supplemental Table S4. RNA-Seq data in the gibberellin signaling pathway
gene_id	CK14d_1_count	CK14d_2_count	CK14d_3_count	CK1d_1_count	CK1d_2_count	CK1d_3_count	CK3d_1_count	CK3d_2_count	CK3d_3_count	CK7d_1_count	CK7d_2_count	CK7d_3_count	GA14d_1_count	GA14d_2_count	GA14d_3_count	GA1d_1_count	GA1d_2_count	GA1d_3_count	GA3d_1_count	GA3d_2_count	GA3d_3_count	GA7d_1_count	GA7d_2_count	GA7d_3_count	CK14d_1_fpkm	CK14d_2_fpkm	CK14d_3_fpkm	CK1d_1_fpkm	CK1d_2_fpkm	CK1d_3_fpkm	CK3d_1_fpkm	CK3d_2_fpkm	CK3d_3_fpkm	CK7d_1_fpkm	CK7d_2_fpkm	CK7d_3_fpkm	GA14d_1_fpkm	GA14d_2_fpkm	GA14d_3_fpkm	GA1d_1_fpkm	GA1d_2_fpkm	GA1d_3_fpkm	GA3d_1_fpkm	GA3d_2_fpkm	GA3d_3_fpkm	GA7d_1_fpkm	GA7d_2_fpkm	GA7d_3_fpkm	GA14dvsCK14d_GA14d
evm.TU.Contig421.435	469	356	509	591	801	437	628	542	332	384	613	279	318	511	243	400	210	323	400	298	300	163	189	245	13.8553	9.60034	13.7078	14.9101	17.1237	13.3588	15.0916	14.3697	8.27778	10.2102	16.0219	7.00673	7.99245	13.7091	6.62529	10.4712	5.43249	8.30366	10.8147	8.02855	8.03082	4.31882	4.95781	6.73502	344.731
evm.TU.Contig341.502	152	122	258	482	442	431	328	467	186	177	300	135	108	201	136	213	149	177	151	223	275	79	193	152	4.6822	3.43052	7.24491	12.6796	9.8526	13.7381	8.21888	12.9101	4.83563	4.90725	8.17595	3.53516	2.83035	5.62275	3.86635	5.81404	4.01911	4.74465	4.25693	6.26455	7.676	2.18257	5.27897	4.35693	144.05
evm.TU.Contig244.13	631	738	759	746	1004	509	988	826	556	757	606	785	926	755	1384	498	507	699	547	524	638	658	691	539	20.5436	21.933	22.5266	20.7414	23.654	17.1479	26.166	24.1343	15.2776	22.1821	17.4555	21.7263	25.6489	22.3224	41.5853	14.3671	14.4542	19.8039	16.2985	15.5581	18.822	19.2136	19.9761	16.3293	995.787
evm.TU.Contig553.11	123	243	81	15	14	60	106	41	243	131	51	213	163	59	332	56	355	211	265	187	149	293	404	172	6.44649	11.6257	3.86999	0.671368	0.530968	3.25397	4.51915	1.92845	10.7488	6.17943	2.36483	9.49001	7.26803	2.80813	16.0588	2.60075	16.2924	9.62334	12.7109	8.93796	7.07621	13.7728	18.8012	8.38837	181.305
evm.TU.Contig180.295	107	225	121	29	82	36	96	65	247	120	95	161	155	113	178	151	301	143	212	129	211	238	307	202	5.17843	9.94012	5.33835	1.19857	2.87178	1.80286	3.77936	2.82315	10.0889	5.22703	4.0677	6.62383	6.382	4.96638	7.95043	6.47566	12.7561	6.02248	9.38996	5.69355	9.25323	10.3306	13.1928	9.09697	144.195
evm.TU.Contig333.24	0	0	0	0	0	0	0	0	0	0	0	0	0	0	0	0	0	0	0	0	0	0	0	0	0	0	0	0	0	0	0	0	0	0	0	0	0	0	0	0	0	0	0	0	0	0	0	0	NA
evm.TU.Contig51.36	5	0	6	0	0	0	0	0	0	0	1	0	3	3	5	1	5	0	0	0	0	2	0	3	0.216129	0	0.23643	0	0	0	0	0	0	0	0.0382432	0	0.110325	0.117764	0.199466	0.0383033	0.189257	0	0	0	0	0.0775369	0	0.120669	3.57989
evm.TU.Contig171.231	0	0	0	0	0	0	0	0	0	0	0	0	0	0	0	0	0	0	0	0	0	0	0	0	0	0	0	0	0	0	0	0	0	0	0	0	0	0	0	0	0	0	0	0	0	0	0	0	NA
evm.TU.Contig331.40	532	674	580	1072	1365	1241	980	1278	1405	658	730	1049	1327	834	1996	1610	1329	1869	2368	1766	1993	1571	1595	1471	12.9919	15.0251	12.9121	22.3567	24.1222	31.3602	19.468	28.0091	28.9582	14.4626	15.7723	21.7774	27.5705	18.4959	44.9862	34.8402	28.42	39.7189	52.9246	39.3307	44.1028	34.4091	34.5867	33.4277	1351.14
evm.TU.Contig184.129	5	11	10	10	2	1	8	2	3	4	4	11	7	10	6	3	6	2	4	6	0	7	5	8	0.169006	0.339405	0.308133	0.288657	0.0489197	0.0349765	0.219965	0.0606692	0.0855828	0.121689	0.11962	0.316077	0.201298	0.306958	0.187171	0.0898556	0.177591	0.0588284	0.123739	0.184953	0	0.212209	0.150068	0.251624	7.40512
evm.TU.Contig462.229	10	9	1	5	0	0	4	6	3	15	3	0	6	3	3	1	3	4	0	2	0	2	5	4	0.350141	0.28766	0.031919	0.149508	0	0	0.113929	0.188539	0.0886538	0.472708	0.092934	0	0.178733	0.0953917	0.0969438	0.0310267	0.0919817	0.121879	0	0.0638633	0	0.0628069	0.155453	0.130327	3.82089
evm.TU.Contig28.249	0	0	0	0	0	0	0	0	0	0	0	0	0	0	0	0	0	0	0	0	0	0	0	0	0	0	0	0	0	0	0	0	0	0	0	0	0	0	0	0	0	0	0	0	0	0	0	0	NA
evm.TU.Contig259.48	1495	1587	1223	570	937	474	1008	703	1460	1360	981	1402	1073	572	1091	811	1325	1150	910	855	879	1354	1572	1032	53.5614	51.9018	39.9433	17.4396	24.2925	17.5725	29.3768	22.6033	44.1466	43.854	31.095	42.7	32.7055	18.6103	36.0738	25.7469	41.5685	35.8537	29.8377	27.9355	28.5362	43.5075	50.0091	34.405	882.44
evm.TU.Contig298.41	4560	6478	4364	2240	3183	3018	3621	2804	6889	4527	4028	5429	4477	2319	4440	3755	5888	5107	6277	5632	4463	7169	7402	4959	119.026	154.352	103.841	49.9316	60.1223	81.5155	76.8843	65.6842	151.763	106.352	93.0201	120.466	99.4201	54.9698	106.959	86.8518	134.58	116.002	149.948	134.066	105.56	167.83	171.558	120.448	3622.11
evm.TU.Contig55.380	1470	1665	1307	860	1233	1123	1075	1009	1600	1222	1394	1598	1700	1068	1480	960	1300	1153	1429	1626	1342	1469	1748	990	37.7904	39.0726	30.63	18.8805	22.9377	29.8737	22.4804	23.2788	34.715	28.2744	31.7057	34.9229	37.1812	24.9334	35.1141	21.8689	29.2647	25.794	33.6209	38.1209	31.2617	33.8704	39.9017	23.6826	1366.27
evm.TU.Contig421.582	90	54	70	97	154	64	152	125	148	46	60	50	66	59	73	86	84	73	138	101	93	59	69	62	2.08726	1.1432	1.47992	1.92113	2.5845	1.53589	2.86754	2.60166	2.89687	0.960176	1.23111	0.985764	1.30223	1.2426	1.56248	1.76736	1.70589	1.47327	2.92905	2.13616	1.9544	1.22722	1.42092	1.338	63.9725
evm.TU.Contig28.251	0	0	0	0	0	0	0	0	0	0	0	0	0	0	0	0	0	0	0	0	0	0	0	0	0	0	0	0	0	0	0	0	0	0	0	0	0	0	0	0	0	0	0	0	0	0	0	0	NA
evm.TU.Contig28.250	0	0	0	0	0	0	0	0	0	0	0	0	0	0	0	0	0	0	0	0	0	0	0	0	0	0	0	0	0	0	0	0	0	0	0	0	0	0	0	0	0	0	0	0	0	0	0	0	NA
evm.TU.Contig447.367	0	10	2	0	3	0	0	7	2	9	4	5	2	2	2	0	2	1	2	0	2	3	4	1	0	0.465195	0.0929133	0	0.110633	0	0	0.320144	0.086021	0.412803	0.180348	0.216611	0.0867125	0.0925588	0.0940648	0	0.08925	0.0443472	0.0932791	0	0.0923564	0.137119	0.181003	0.0474211	1.93535
evm.TU.Contig447.204	0	6	0	1	0	1	0	0	0	0	1	4	1	0	2	2	0	1	0	1	0	2	2	0	0	0.574108	0	0.0895157	0	0.108466	0	0	0	0	0.0927383	0.356432	0.0891782	0	0.193479	0.185768	0	0.0912165	0	0.0955932	0	0.188024	0.18615	0	0.982825
evm.TU.Contig16.807	1	0	0	0	1	0	1	0	0	0	1	0	0	5	0	0	1	2	0	3	0	0	2	1	0.0327339	0	0	0	0.0236876	0	0.0266275	0	0	0	0.0289607	0	0	0.148633	0	0	0.0286639	0.0569709	0	0.0895567	0	0	0.0581318	0.0304599	1.61641
evm.TU.Contig987.42	289	278	382	254	231	269	195	200	242	362	323	403	286	297	257	197	296	325	163	166	138	190	245	167	6.01872	5.285	7.25231	4.51742	3.48129	5.797	3.30349	3.73803	4.25358	6.78537	5.9514	7.13477	5.06737	5.61706	4.93964	3.6355	5.39803	5.88999	3.10676	3.15277	2.60424	3.54891	4.53062	3.23634	270.496
evm.TU.Contig562.2	775	888	1325	1334	1381	1222	562	749	721	1246	1212	1337	581	510	1396	679	858	1370	755	683	583	1441	1757	1232	20.301	21.2336	31.6402	29.8417	26.1778	33.1232	11.9753	17.6078	15.9399	29.3761	28.0886	29.7726	12.948	12.132	33.7488	15.7608	19.6807	31.2293	18.0999	16.3161	13.8383	33.8544	40.8671	30.0302	815.089
evm.TU.Contig197.32	1103	1190	1358	2029	1859	1414	818	1037	881	1533	1333	1027	702	585	1044	436	522	586	591	1326	746	1304	1142	791	29.6299	29.1807	33.2554	46.5466	36.1374	39.3051	17.8748	25	19.974	37.0643	31.6808	23.4528	16.0436	14.2711	25.8828	10.3785	12.279	13.6986	14.5297	32.4846	18.1589	31.4172	27.24	19.7725	757.227
[truncated: 28 more columns]
