# Supplementary material for: Physiological and Transcriptomic Responses of Growth in Neolamarckia cadamba Stimulated by Exogenous Gibberellins
Source: Int J Mol Sci. 2022 Oct 6;23(19):11842. doi: 10.3390/ijms231911842 (PMC9569647; doi:10.3390/ijms231911842)
Supplement: Supplementary file 1 [file ijms-23-11842-s001.zip › Supplemental Table S5.xlsx]

## Sheet: Sheet1
Supplemental Table S5. RNA-Seq data of GID1
gene_id	CK14d_1_count	CK14d_2_count	CK14d_3_count	CK1d_1_count	CK1d_2_count	CK1d_3_count	CK3d_1_count	CK3d_2_count	CK3d_3_count	CK7d_1_count	CK7d_2_count	CK7d_3_count	GA14d_1_count	GA14d_2_count	GA14d_3_count	GA1d_1_count	GA1d_2_count	GA1d_3_count	GA3d_1_count	GA3d_2_count	GA3d_3_count	GA7d_1_count	GA7d_2_count	GA7d_3_count	CK14d_1_fpkm	CK14d_2_fpkm	CK14d_3_fpkm	CK1d_1_fpkm	CK1d_2_fpkm	CK1d_3_fpkm	CK3d_1_fpkm	CK3d_2_fpkm	CK3d_3_fpkm	CK7d_1_fpkm	CK7d_2_fpkm	CK7d_3_fpkm	GA14d_1_fpkm	GA14d_2_fpkm	GA14d_3_fpkm	GA1d_1_fpkm	GA1d_2_fpkm	GA1d_3_fpkm	GA3d_1_fpkm	GA3d_2_fpkm	GA3d_3_fpkm	GA7d_1_fpkm	GA7d_2_fpkm	GA7d_3_fpkm	GA14dvsCK14d_GA14d
evm.TU.Contig421.435	469	356	509	591	801	437	628	542	332	384	613	279	318	511	243	400	210	323	400	298	300	163	189	245	13.8553	9.60034	13.7078	14.9101	17.1237	13.3588	15.0916	14.3697	8.27778	10.2102	16.0219	7.00673	7.99245	13.7091	6.62529	10.4712	5.43249	8.30366	10.8147	8.02855	8.03082	4.31882	4.95781	6.73502	344.731
evm.TU.Contig341.502	152	122	258	482	442	431	328	467	186	177	300	135	108	201	136	213	149	177	151	223	275	79	193	152	4.6822	3.43052	7.24491	12.6796	9.8526	13.7381	8.21888	12.9101	4.83563	4.90725	8.17595	3.53516	2.83035	5.62275	3.86635	5.81404	4.01911	4.74465	4.25693	6.26455	7.676	2.18257	5.27897	4.35693	144.05
evm.TU.Contig244.13	631	738	759	746	1004	509	988	826	556	757	606	785	926	755	1384	498	507	699	547	524	638	658	691	539	20.5436	21.933	22.5266	20.7414	23.654	17.1479	26.166	24.1343	15.2776	22.1821	17.4555	21.7263	25.6489	22.3224	41.5853	14.3671	14.4542	19.8039	16.2985	15.5581	18.822	19.2136	19.9761	16.3293	995.787
[truncated: 28 more columns]
