# Supplementary material for: Physiological and Transcriptomic Responses of Growth in Neolamarckia cadamba Stimulated by Exogenous Gibberellins
Source: Int J Mol Sci. 2022 Oct 6;23(19):11842. doi: 10.3390/ijms231911842 (PMC9569647; doi:10.3390/ijms231911842)
Supplement: Supplementary file 1 [file ijms-23-11842-s001.zip › Supplemental Table S6.xlsx]

## Sheet: Sheet1
Supplemental Table S6. RNA-Seq data of DELLA
gene_id	CK14d_1_count	CK14d_2_count	CK14d_3_count	CK1d_1_count	CK1d_2_count	CK1d_3_count	CK3d_1_count	CK3d_2_count	CK3d_3_count	CK7d_1_count	CK7d_2_count	CK7d_3_count	GA14d_1_count	GA14d_2_count	GA14d_3_count	GA1d_1_count	GA1d_2_count	GA1d_3_count	GA3d_1_count	GA3d_2_count	GA3d_3_count	GA7d_1_count	GA7d_2_count	GA7d_3_count	CK14d_1_fpkm	CK14d_2_fpkm	CK14d_3_fpkm	CK1d_1_fpkm	CK1d_2_fpkm	CK1d_3_fpkm	CK3d_1_fpkm	CK3d_2_fpkm	CK3d_3_fpkm	CK7d_1_fpkm	CK7d_2_fpkm	CK7d_3_fpkm	GA14d_1_fpkm	GA14d_2_fpkm	GA14d_3_fpkm	GA1d_1_fpkm	GA1d_2_fpkm	GA1d_3_fpkm	GA3d_1_fpkm	GA3d_2_fpkm	GA3d_3_fpkm	GA7d_1_fpkm	GA7d_2_fpkm	GA7d_3_fpkm	GA14dvsCK14d_GA14d
evm.TU.Contig553.11	123	243	81	15	14	60	106	41	243	131	51	213	163	59	332	56	355	211	265	187	149	293	404	172	6.44649	11.6257	3.86999	0.671368	0.530968	3.25397	4.51915	1.92845	10.7488	6.17943	2.36483	9.49001	7.26803	2.80813	16.0588	2.60075	16.2924	9.62334	12.7109	8.93796	7.07621	13.7728	18.8012	8.38837	181.305
evm.TU.Contig180.295	107	225	121	29	82	36	96	65	247	120	95	161	155	113	178	151	301	143	212	129	211	238	307	202	5.17843	9.94012	5.33835	1.19857	2.87178	1.80286	3.77936	2.82315	10.0889	5.22703	4.0677	6.62383	6.382	4.96638	7.95043	6.47566	12.7561	6.02248	9.38996	5.69355	9.25323	10.3306	13.1928	9.09697	144.195
evm.TU.Contig333.24	0	0	0	0	0	0	0	0	0	0	0	0	0	0	0	0	0	0	0	0	0	0	0	0	0	0	0	0	0	0	0	0	0	0	0	0	0	0	0	0	0	0	0	0	0	0	0	0	NA
evm.TU.Contig51.36	5	0	6	0	0	0	0	0	0	0	1	0	3	3	5	1	5	0	0	0	0	2	0	3	0.216129	0	0.23643	0	0	0	0	0	0	0	0.0382432	0	0.110325	0.117764	0.199466	0.0383033	0.189257	0	0	0	0	0.0775369	0	0.120669	3.57989
evm.TU.Contig171.231	0	0	0	0	0	0	0	0	0	0	0	0	0	0	0	0	0	0	0	0	0	0	0	0	0	0	0	0	0	0	0	0	0	0	0	0	0	0	0	0	0	0	0	0	0	0	0	0	NA
evm.TU.Contig331.40	532	674	580	1072	1365	1241	980	1278	1405	658	730	1049	1327	834	1996	1610	1329	1869	2368	1766	1993	1571	1595	1471	12.9919	15.0251	12.9121	22.3567	24.1222	31.3602	19.468	28.0091	28.9582	14.4626	15.7723	21.7774	27.5705	18.4959	44.9862	34.8402	28.42	39.7189	52.9246	39.3307	44.1028	34.4091	34.5867	33.4277	1351.14
evm.TU.Contig184.129	5	11	10	10	2	1	8	2	3	4	4	11	7	10	6	3	6	2	4	6	0	7	5	8	0.169006	0.339405	0.308133	0.288657	0.0489197	0.0349765	0.219965	0.0606692	0.0855828	0.121689	0.11962	0.316077	0.201298	0.306958	0.187171	0.0898556	0.177591	0.0588284	0.123739	0.184953	0	0.212209	0.150068	0.251624	7.40512
evm.TU.Contig462.229	10	9	1	5	0	0	4	6	3	15	3	0	6	3	3	1	3	4	0	2	0	2	5	4	0.350141	0.28766	0.031919	0.149508	0	0	0.113929	0.188539	0.0886538	0.472708	0.092934	0	0.178733	0.0953917	0.0969438	0.0310267	0.0919817	0.121879	0	0.0638633	0	0.0628069	0.155453	0.130327	3.82089
evm.TU.Contig28.249	0	0	0	0	0	0	0	0	0	0	0	0	0	0	0	0	0	0	0	0	0	0	0	0	0	0	0	0	0	0	0	0	0	0	0	0	0	0	0	0	0	0	0	0	0	0	0	0	NA
evm.TU.Contig259.48	1495	1587	1223	570	937	474	1008	703	1460	1360	981	1402	1073	572	1091	811	1325	1150	910	855	879	1354	1572	1032	53.5614	51.9018	39.9433	17.4396	24.2925	17.5725	29.3768	22.6033	44.1466	43.854	31.095	42.7	32.7055	18.6103	36.0738	25.7469	41.5685	35.8537	29.8377	27.9355	28.5362	43.5075	50.0091	34.405	882.44
evm.TU.Contig298.41	4560	6478	4364	2240	3183	3018	3621	2804	6889	4527	4028	5429	4477	2319	4440	3755	5888	5107	6277	5632	4463	7169	7402	4959	119.026	154.352	103.841	49.9316	60.1223	81.5155	76.8843	65.6842	151.763	106.352	93.0201	120.466	99.4201	54.9698	106.959	86.8518	134.58	116.002	149.948	134.066	105.56	167.83	171.558	120.448	3622.11
evm.TU.Contig55.380	1470	1665	1307	860	1233	1123	1075	1009	1600	1222	1394	1598	1700	1068	1480	960	1300	1153	1429	1626	1342	1469	1748	990	37.7904	39.0726	30.63	18.8805	22.9377	29.8737	22.4804	23.2788	34.715	28.2744	31.7057	34.9229	37.1812	24.9334	35.1141	21.8689	29.2647	25.794	33.6209	38.1209	31.2617	33.8704	39.9017	23.6826	1366.27
evm.TU.Contig421.582	90	54	70	97	154	64	152	125	148	46	60	50	66	59	73	86	84	73	138	101	93	59	69	62	2.08726	1.1432	1.47992	1.92113	2.5845	1.53589	2.86754	2.60166	2.89687	0.960176	1.23111	0.985764	1.30223	1.2426	1.56248	1.76736	1.70589	1.47327	2.92905	2.13616	1.9544	1.22722	1.42092	1.338	63.9725
evm.TU.Contig28.251	0	0	0	0	0	0	0	0	0	0	0	0	0	0	0	0	0	0	0	0	0	0	0	0	0	0	0	0	0	0	0	0	0	0	0	0	0	0	0	0	0	0	0	0	0	0	0	0	NA
evm.TU.Contig28.250	0	0	0	0	0	0	0	0	0	0	0	0	0	0	0	0	0	0	0	0	0	0	0	0	0	0	0	0	0	0	0	0	0	0	0	0	0	0	0	0	0	0	0	0	0	0	0	0	NA
evm.TU.Contig447.367	0	10	2	0	3	0	0	7	2	9	4	5	2	2	2	0	2	1	2	0	2	3	4	1	0	0.465195	0.0929133	0	0.110633	0	0	0.320144	0.086021	0.412803	0.180348	0.216611	0.0867125	0.0925588	0.0940648	0	0.08925	0.0443472	0.0932791	0	0.0923564	0.137119	0.181003	0.0474211	1.93535
evm.TU.Contig447.204	0	6	0	1	0	1	0	0	0	0	1	4	1	0	2	2	0	1	0	1	0	2	2	0	0	0.574108	0	0.0895157	0	0.108466	0	0	0	0	0.0927383	0.356432	0.0891782	0	0.193479	0.185768	0	0.0912165	0	0.0955932	0	0.188024	0.18615	0	0.982825
evm.TU.Contig16.807	1	0	0	0	1	0	1	0	0	0	1	0	0	5	0	0	1	2	0	3	0	0	2	1	0.0327339	0	0	0	0.0236876	0	0.0266275	0	0	0	0.0289607	0	0	0.148633	0	0	0.0286639	0.0569709	0	0.0895567	0	0	0.0581318	0.0304599	1.61641
[truncated: 28 more columns]
