# Supplementary material for: Physiological and Transcriptomic Responses of Growth in Neolamarckia cadamba Stimulated by Exogenous Gibberellins
Source: Int J Mol Sci. 2022 Oct 6;23(19):11842. doi: 10.3390/ijms231911842 (PMC9569647; doi:10.3390/ijms231911842)
Supplement: Supplementary file 1 [file ijms-23-11842-s001.zip › Supplemental Table S7.xlsx]

## Sheet: Sheet1
Supplemental Table S7. RNA-Seq data of cell division
gene_id	CK14d_1_count	CK14d_2_count	CK14d_3_count	CK1d_1_count	CK1d_2_count	CK1d_3_count	CK3d_1_count	CK3d_2_count	CK3d_3_count	CK7d_1_count	CK7d_2_count	CK7d_3_count	GA14d_1_count	GA14d_2_count	GA14d_3_count	GA1d_1_count	GA1d_2_count	GA1d_3_count	GA3d_1_count	GA3d_2_count	GA3d_3_count	GA7d_1_count	GA7d_2_count	GA7d_3_count	CK14d_1_fpkm	CK14d_2_fpkm	CK14d_3_fpkm	CK1d_1_fpkm	CK1d_2_fpkm	CK1d_3_fpkm	CK3d_1_fpkm	CK3d_2_fpkm	CK3d_3_fpkm	CK7d_1_fpkm	CK7d_2_fpkm	CK7d_3_fpkm	GA14d_1_fpkm	GA14d_2_fpkm	GA14d_3_fpkm	GA1d_1_fpkm	GA1d_2_fpkm	GA1d_3_fpkm	GA3d_1_fpkm	GA3d_2_fpkm	GA3d_3_fpkm	GA7d_1_fpkm	GA7d_2_fpkm	GA7d_3_fpkm	GA14dvsCK14d_GA14d
evm.TU.Contig81.575	1214	1327	1542	1432	1726	1417	1609	1300	1683	1473	1596	1351	1325	1283	927	1342	1296	1475	1450	1708	1318	1293	1293	1151	23.3956	23.3443	27.0898	23.5672	24.0701	28.2572	25.2234	22.4835	27.3736	25.5492	27.2119	22.1329	21.7241	22.4537	16.4874	22.9171	21.8704	24.7361	25.5739	30.018	23.0158	22.3485	22.1258	20.6405	1133.89
evm.TU.Contig81.1092	449	507	555	447	559	396	486	534	483	484	456	441	588	573	470	504	483	490	489	579	500	400	373	535	18.1216	18.679	20.4197	15.4067	16.3262	16.5383	15.9558	19.3418	16.4525	17.5814	16.2827	15.1307	20.1901	21.0016	17.5067	18.0249	17.07	17.2096	18.0623	21.3112	18.2859	14.4792	13.3673	20.0925	524.207
evm.TU.Contig81.1091	181	189	235	124	92	142	123	238	166	172	152	153	245	252	220	109	151	150	187	165	220	155	148	168	14.956	14.2558	17.7015	8.75002	5.50106	12.1414	8.2675	17.649	11.5765	12.7916	11.112	10.7472	17.2232	18.9097	16.777	7.98096	10.9257	10.7858	14.1414	12.4337	16.4723	11.4869	10.8588	12.9174	230.882
evm.TU.Contig296.188	79	140	80	41	116	59	221	216	258	105	72	150	139	54	157	107	190	106	148	129	128	292	323	280	2.3848	3.85786	2.20151	1.05696	2.53399	1.84298	5.42687	5.85173	6.57321	2.85281	1.92295	3.84932	3.56985	1.48035	4.37401	2.8622	5.02244	2.78455	4.08883	3.55134	3.50131	7.90573	8.6579	7.86526	113.119
evm.TU.Contig22.158	114	174	140	90	168	50	293	233	303	170	136	244	184	66	299	136	271	154	236	158	135	407	505	416	3.40725	4.74726	3.81447	2.29717	3.63355	1.54637	7.12359	6.24973	7.6432	4.57306	3.59624	6.19952	4.67872	1.79139	8.24758	3.60189	7.0926	4.00539	6.45542	4.3066	3.65619	10.9101	13.4022	11.5697	178.824
evm.TU.Contig208.23	106	130	135	220	196	127	214	210	195	124	129	154	138	153	165	272	313	199	143	177	187	195	206	181	3.75709	4.20614	4.36201	6.65916	5.02718	4.65795	6.1701	6.67993	5.8333	3.95573	4.04526	4.64019	4.16137	4.92475	5.39742	8.54294	9.71466	6.13796	4.63869	5.72134	6.00598	6.19891	6.48334	5.96974	147.526
evm.TU.Contig480.526	61	80	78	42	78	36	105	95	77	89	69	63	86	41	67	81	111	70	73	69	95	80	105	108	2.24111	2.68299	2.61238	1.31775	2.07372	1.36862	3.13802	3.13231	2.38758	2.94295	2.24282	1.96763	2.68809	1.36793	2.27177	2.63701	3.57104	2.23799	2.45454	2.31186	3.16267	2.63608	3.42538	3.69223	62.2419
evm.TU.Contig208.23	106	130	135	220	196	127	214	210	195	124	129	154	138	153	165	272	313	199	143	177	187	195	206	181	3.75709	4.20614	4.36201	6.65916	5.02718	4.65795	6.1701	6.67993	5.8333	3.95573	4.04526	4.64019	4.16137	4.92475	5.39742	8.54294	9.71466	6.13796	4.63869	5.72134	6.00598	6.19891	6.48334	5.96974	147.526
evm.TU.Contig480.526	61	80	78	42	78	36	105	95	77	89	69	63	86	41	67	81	111	70	73	69	95	80	105	108	2.24111	2.68299	2.61238	1.31775	2.07372	1.36862	3.13802	3.13231	2.38758	2.94295	2.24282	1.96763	2.68809	1.36793	2.27177	2.63701	3.57104	2.23799	2.45454	2.31186	3.16267	2.63608	3.42538	3.69223	62.2419
evm.TU.Contig208.23	106	130	135	220	196	127	214	210	195	124	129	154	138	153	165	272	313	199	143	177	187	195	206	181	3.75709	4.20614	4.36201	6.65916	5.02718	4.65795	6.1701	6.67993	5.8333	3.95573	4.04526	4.64019	4.16137	4.92475	5.39742	8.54294	9.71466	6.13796	4.63869	5.72134	6.00598	6.19891	6.48334	5.96974	147.526
evm.TU.Contig480.526	61	80	78	42	78	36	105	95	77	89	69	63	86	41	67	81	111	70	73	69	95	80	105	108	2.24111	2.68299	2.61238	1.31775	2.07372	1.36862	3.13802	3.13231	2.38758	2.94295	2.24282	1.96763	2.68809	1.36793	2.27177	2.63701	3.57104	2.23799	2.45454	2.31186	3.16267	2.63608	3.42538	3.69223	62.2419
evm.TU.Contig208.23	106	130	135	220	196	127	214	210	195	124	129	154	138	153	165	272	313	199	143	177	187	195	206	181	3.75709	4.20614	4.36201	6.65916	5.02718	4.65795	6.1701	6.67993	5.8333	3.95573	4.04526	4.64019	4.16137	4.92475	5.39742	8.54294	9.71466	6.13796	4.63869	5.72134	6.00598	6.19891	6.48334	5.96974	147.526
evm.TU.Contig480.526	61	80	78	42	78	36	105	95	77	89	69	63	86	41	67	81	111	70	73	69	95	80	105	108	2.24111	2.68299	2.61238	1.31775	2.07372	1.36862	3.13802	3.13231	2.38758	2.94295	2.24282	1.96763	2.68809	1.36793	2.27177	2.63701	3.57104	2.23799	2.45454	2.31186	3.16267	2.63608	3.42538	3.69223	62.2419
evm.TU.Contig208.23	106	130	135	220	196	127	214	210	195	124	129	154	138	153	165	272	313	199	143	177	187	195	206	181	3.75709	4.20614	4.36201	6.65916	5.02718	4.65795	6.1701	6.67993	5.8333	3.95573	4.04526	4.64019	4.16137	4.92475	5.39742	8.54294	9.71466	6.13796	4.63869	5.72134	6.00598	6.19891	6.48334	5.96974	147.526
evm.TU.Contig480.526	61	80	78	42	78	36	105	95	77	89	69	63	86	41	67	81	111	70	73	69	95	80	105	108	2.24111	2.68299	2.61238	1.31775	2.07372	1.36862	3.13802	3.13231	2.38758	2.94295	2.24282	1.96763	2.68809	1.36793	2.27177	2.63701	3.57104	2.23799	2.45454	2.31186	3.16267	2.63608	3.42538	3.69223	62.2419
[truncated: 28 more columns]
