# Supplementary material for: Physiological and Transcriptomic Responses of Growth in Neolamarckia cadamba Stimulated by Exogenous Gibberellins
Source: Int J Mol Sci. 2022 Oct 6;23(19):11842. doi: 10.3390/ijms231911842 (PMC9569647; doi:10.3390/ijms231911842)
Supplement: Supplementary file 1 [file ijms-23-11842-s001.zip › Supplemental Table S8.xlsx]

## Sheet: Sheet1
Supplemental Table S8. RNA-Seq data of expansion genes
gene_id	CK14d_1_count	CK14d_2_count	CK14d_3_count	CK1d_1_count	CK1d_2_count	CK1d_3_count	CK3d_1_count	CK3d_2_count	CK3d_3_count	CK7d_1_count	CK7d_2_count	CK7d_3_count	GA14d_1_count	GA14d_2_count	GA14d_3_count	GA1d_1_count	GA1d_2_count	GA1d_3_count	GA3d_1_count	GA3d_2_count	GA3d_3_count	GA7d_1_count	GA7d_2_count	GA7d_3_count	CK14d_1_fpkm	CK14d_2_fpkm	CK14d_3_fpkm	CK1d_1_fpkm	CK1d_2_fpkm	CK1d_3_fpkm	CK3d_1_fpkm	CK3d_2_fpkm	CK3d_3_fpkm	CK7d_1_fpkm	CK7d_2_fpkm	CK7d_3_fpkm	GA14d_1_fpkm	GA14d_2_fpkm	GA14d_3_fpkm	GA1d_1_fpkm	GA1d_2_fpkm	GA1d_3_fpkm	GA3d_1_fpkm	GA3d_2_fpkm	GA3d_3_fpkm	GA7d_1_fpkm	GA7d_2_fpkm	GA7d_3_fpkm	GA14dvsCK14d_GA14d
evm.TU.Contig81.676	2500	3883	2664	930	3432	705	3857	2407	7441	2768	2038	3205	3200	1295	1978	2835	4011	4138	5064	3644	3146	5714	5708	3242	133.774	189.667	129.949	42.4976	132.892	39.0359	167.885	115.588	336.043	133.308	96.4818	145.79	145.677	62.9284	97.6816	134.424	187.94	192.684	247.992	177.823	152.541	274.224	271.206	161.426	2067.13
evm.TU.Contig96.327	272	999	332	704	2811	421	4658	2682	11503	329	332	1174	583	52	2310	1976	2453	2453	12428	11337	6173	3279	4628	3485	12.1944	40.8837	13.5686	26.9534	91.1955	19.5307	169.872	107.908	435.246	13.2753	13.1686	44.7432	22.2367	2.11709	95.5781	78.5	96.2997	95.7002	509.923	463.518	250.774	131.846	184.234	145.386	976.967
evm.TU.Contig477.325	3502	2936	2848	5365	2369	5539	1974	962	795	4264	2122	2308	2513	3705	4273	2198	2402	3042	885	824	1374	1378	1239	767	90.1682	69.0062	66.8474	117.966	44.1392	147.575	41.3445	22.2289	17.2758	98.8129	48.3386	50.5176	55.0479	86.6308	101.538	50.1484	54.1562	68.1588	20.8542	19.3483	32.0568	31.8216	28.3266	18.3765	3412.76
evm.TU.Contig583.229	1591	2022	1880	993	3034	500	2821	1612	3201	1239	1679	2064	2876	2402	1534	2797	2103	2636	4012	2739	2515	2258	2015	2378	79.3726	92.0822	85.4998	42.3058	109.531	25.8116	114.482	72.1725	134.778	55.6328	74.1074	87.5344	122.067	108.823	70.6288	123.647	91.8707	114.438	183.178	124.615	113.693	101.032	89.2608	110.393	2175.61
evm.TU.Contig66.320	783	2571	720	200	955	367	1870	928	3603	1697	347	2602	1157	45	3337	1560	2508	1532	1923	2372	1298	1684	3510	1067	36.7162	110.05	30.7776	8.00896	32.4057	17.8076	71.3296	39.0526	142.591	71.6203	14.3958	103.722	46.1572	1.91626	144.414	64.8205	102.982	62.5143	82.5255	101.435	55.1527	70.8227	146.146	46.5576	1497.89
evm.TU.Contig84.314	118	514	105	113	1526	173	986	645	2365	125	185	403	169	10	309	710	1310	884	4877	3540	2507	762	1013	754	9.28766	36.9302	7.53391	7.59545	86.9163	14.0901	63.1297	45.5607	157.105	8.8551	12.8827	26.9649	11.3168	0.714778	22.446	49.5194	90.2886	60.5483	351.31	254.101	178.803	53.7916	70.7978	55.2238	159.516
evm.TU.Contig184.428	167	248	151	123	622	245	735	520	1311	182	202	599	134	41	266	1065	1464	1540	2094	2102	921	968	939	594	14.7743	20.028	12.178	9.2928	39.8202	22.4286	52.8945	41.2858	97.8874	14.4918	15.8108	45.0491	10.0857	3.29398	21.7184	83.4896	113.415	118.56	169.543	169.591	73.8323	76.807	73.7636	48.8999	144.276
evm.TU.Contig207.296	309	446	435	237	670	250	710	473	1075	299	350	559	655	488	455	759	635	781	1499	817	932	546	645	575	11.9829	15.7881	15.3779	7.84876	18.8018	10.032	22.3972	16.4615	35.1839	10.436	12.0083	18.4282	21.61	17.1857	16.2843	26.0817	21.5632	26.3559	53.2006	28.8937	32.7502	18.9902	22.2099	20.7492	512.151
evm.TU.Contig180.115	320	704	412	50	731	104	270	264	400	362	257	548	934	332	850	560	549	507	900	649	576	1037	1299	1290	13.1471	26.4026	15.4306	1.75429	21.733	4.42138	9.02351	9.73396	13.8699	13.3859	9.34164	19.1394	32.6465	12.3869	32.2296	20.3873	19.751	18.1264	33.8404	24.3166	21.4436	38.2114	47.3886	49.3174	680.762
evm.TU.Contig462.58	332	477	182	64	315	187	430	322	961	617	267	662	252	80	1111	328	742	744	515	369	559	598	1787	933	13.3995	17.5737	6.6962	2.20588	9.1999	7.80974	14.1173	11.6631	32.7346	22.4127	9.53393	22.7131	8.65289	2.93215	41.3829	11.7305	26.2235	26.1305	19.0226	13.5817	20.4436	21.6464	64.0413	35.0399	478.964
evm.TU.Contig294.43	2	4	0	669	152	7917	0	5	0	2	3	0	214	1276	469	831	0	0	5	0	7	3	193	509	0.145031	0.26478	0	41.4293	7.97621	594.068	0	0.325392	0	0.130533	0.19247	0	13.2025	84.0288	31.3877	53.3979	0	0	0.331829	0	0.459965	0.195113	12.4272	34.3463	636.709
evm.TU.Contig44.41	363	529	354	228	349	120	395	288	556	476	346	494	425	203	434	346	541	365	428	351	384	453	530	458	17.71	23.5593	15.7443	9.49946	12.3214	6.05814	15.6763	12.6099	22.894	20.9016	14.9348	20.4884	17.6406	8.99406	19.5415	14.9583	23.1125	15.4964	19.1104	15.617	16.9762	19.8219	22.9601	20.7926	342.538
evm.TU.Contig61.119	274	262	335	87	399	273	559	430	494	214	203	272	276	198	184	567	468	516	549	529	441	432	301	372	13.3975	11.6941	14.9322	3.63281	14.1178	13.8127	22.2339	18.8689	20.386	9.4177	8.78171	11.306	11.4813	8.79192	8.30321	24.5667	20.038	21.9557	24.5673	23.5888	19.5392	18.9448	13.0685	16.9257	210.726
evm.TU.Contig298.126	283	391	284	141	286	150	390	273	458	311	197	365	475	253	375	276	362	294	408	520	373	315	450	313	20.3661	25.6857	18.6314	8.66545	14.8939	11.1701	22.8306	17.6315	27.8176	20.1438	12.5429	22.3297	29.0821	16.5344	24.9063	17.6004	22.8122	18.4117	26.8717	34.1274	24.3235	20.3314	28.7554	20.9602	354.033
evm.TU.Contig60.269	288	534	664	35	192	7	469	339	579	240	457	501	454	25	52	212	343	472	309	270	404	97	187	227	12.026	20.3547	25.2757	1.24809	5.80165	0.302462	15.9306	12.7038	20.4052	9.01983	16.8832	17.7842	16.1285	0.948014	2.00395	7.84434	12.5418	17.1512	11.8086	10.2818	15.2864	3.63274	6.93354	8.82033	164.585
evm.TU.Contig22.36	20	77	14	16	108	59	134	141	412	72	37	257	101	49	278	312	332	310	1674	726	642	233	594	302	1.28713	4.52354	0.82135	0.879355	5.02967	3.92907	7.01505	8.14364	22.3781	4.17047	2.10671	14.0603	5.53	2.86376	16.5118	17.7926	18.7098	17.3612	98.5966	42.6097	37.439	13.4488	33.9442	18.0855	140.827
evm.TU.Contig130.25	236	191	81	45	193	160	485	213	701	398	170	236	11	0	53	311	513	417	257	251	124	272	186	139	20.6311	15.2419	6.45509	3.35949	12.2093	14.4735	34.4893	16.7108	51.7204	31.315	13.1483	17.5384	0.818113	0	4.27604	24.0914	39.2704	31.7228	20.5616	20.0107	9.82264	21.3262	14.4381	11.3072	21.3025
evm.TU.Contig84.96	207	181	338	82	459	29	143	89	106	135	268	213	416	242	119	291	208	256	238	163	178	279	185	245	17.6767	14.1093	26.312	5.97992	28.3639	2.56256	9.93344	6.82067	7.6396	10.3758	20.2477	15.4625	30.2228	18.7669	9.37852	22.0199	15.5536	19.0237	18.6004	12.694	13.7736	21.3683	14.0278	19.4683	245.786
evm.TU.Contig14.275	0	15	0	72	400	50	55	83	117	10	8	119	56	1	495	393	167	239	414	750	306	65	300	486	0	0.6147	0	2.76033	12.9945	2.3227	2.0085	3.34397	4.43299	0.404051	0.317745	4.54144	2.13883	0.0407684	20.5087	15.6337	6.56495	9.33685	17.0095	30.7056	12.4479	2.61713	11.9587	20.3023	184.982
evm.TU.Contig296.69	1	4	0	10	89	47	109	93	145	1	1	61	25	12	87	142	172	212	1355	488	243	368	80	242	0.052535	0.191824	0	0.448641	3.38346	2.555	4.65809	4.38468	6.4291	0.0472833	0.0464793	2.72425	1.11738	0.572501	4.21817	6.61042	7.91251	9.69191	65.148	23.3801	11.5678	17.3393	3.73185	11.8303	40.9721
evm.TU.Contig638.2	49	113	11	62	78	118	259	145	483	197	23	223	12	3	90	67	204	367	211	118	95	336	265	93	1.86531	3.9267	0.381728	2.01557	2.14868	4.64816	8.02023	4.95369	15.518	6.74963	0.774628	7.21653	0.388639	0.10371	3.16194	2.26007	6.80021	12.1575	7.35107	4.09652	3.27698	11.4717	8.95748	3.29434	35.1004
evm.TU.Contig294.42	0	0	6	101	52	551	3	99	1	0	0	1	36	1199	34	580	0	1	51	6	62	0	38	358	0	0	0.337914	5.32868	2.32473	35.2244	0.150765	5.48895	0.0521412	0	0	0.052519	1.89217	67.2688	1.93858	31.7518	0	0.0537617	2.88357	0.338047	3.47085	0	2.08457	20.5808	410.137
evm.TU.Contig66.1343	52	68	9	99	826	11	83	73	35	57	72	136	52	2	265	126	239	101	64	95	119	26	324	7	2.59615	3.09906	0.409615	4.22098	29.8421	0.568283	3.37084	3.27082	1.47478	2.5613	3.18032	5.77211	2.20872	0.0906784	12.2104	5.57429	10.4487	4.38807	2.92429	4.32543	5.38357	1.16422	14.3634	0.325204	106.241
evm.TU.Contig383.306	59	94	146	86	73	99	32	44	53	33	33	28	45	172	32	63	43	32	37	23	17	49	53	49	3.50784	5.10164	7.91312	4.36654	3.14075	6.09071	1.54764	2.34772	2.65948	1.76588	1.73585	1.41519	2.2762	9.28673	1.75588	3.3191	2.23869	1.65563	2.01327	1.24708	0.915868	2.61288	2.79801	2.71091	80.2025
evm.TU.Contig184.742	7	10	35	35	94	6	24	69	18	10	15	20	17	29	10	68	38	33	7	29	41	7	3	25	0.217648	0.283826	0.992047	0.929344	2.11499	0.193043	0.607018	1.92536	0.47235	0.279844	0.412629	0.528636	0.449694	0.818846	0.286955	1.87352	1.03461	0.892887	0.199191	0.822307	1.15515	0.195205	0.0828256	0.723317	17.9608
evm.TU.Contig969.46	12	18	11	59	38	16	28	33	28	14	18	26	17	29	23	26	27	28	10	14	37	16	33	24	1.03674	1.41957	0.866344	4.35305	2.37573	1.43039	1.9678	2.55865	2.04165	1.08862	1.37586	1.90956	1.24954	2.27528	1.8339	1.99047	2.04264	2.10511	0.790686	1.10306	2.8966	1.23978	2.53157	1.92945	22.3604
evm.TU.Contig383.204	8	6	0	2	8	4	7	11	8	5	2	8	1	0	0	6	7	5	8	9	3	1	7	0	0.704931	0.482617	0	0.1505	0.510116	0.364722	0.50175	0.869873	0.59495	0.396539	0.155919	0.599261	0.0749666	0	0	0.46849	0.540123	0.3834	0.645149	0.723233	0.239538	0.07903	0.547697	0	0.305956
[truncated: 28 more columns]
