# Supplementary material for: Physiological and Transcriptomic Responses of Growth in Neolamarckia cadamba Stimulated by Exogenous Gibberellins
Source: Int J Mol Sci. 2022 Oct 6;23(19):11842. doi: 10.3390/ijms231911842 (PMC9569647; doi:10.3390/ijms231911842)
Supplement: Supplementary file 1 [file ijms-23-11842-s001.zip › Supplemental Table S9.xlsx]

## Sheet: Sheet1
Supplemental Table S9. RNA-Seq data of phytohormone
gene_id	CK14d_1_count	CK14d_2_count	CK14d_3_count	CK1d_1_count	CK1d_2_count	CK1d_3_count	CK3d_1_count	CK3d_2_count	CK3d_3_count	CK7d_1_count	CK7d_2_count	CK7d_3_count	GA14d_1_count	GA14d_2_count	GA14d_3_count	GA1d_1_count	GA1d_2_count	GA1d_3_count	GA3d_1_count	GA3d_2_count	GA3d_3_count	GA7d_1_count	GA7d_2_count	GA7d_3_count	CK14d_1_fpkm	CK14d_2_fpkm	CK14d_3_fpkm	CK1d_1_fpkm	CK1d_2_fpkm	CK1d_3_fpkm	CK3d_1_fpkm	CK3d_2_fpkm	CK3d_3_fpkm	CK7d_1_fpkm	CK7d_2_fpkm	CK7d_3_fpkm	GA14d_1_fpkm	GA14d_2_fpkm	GA14d_3_fpkm	GA1d_1_fpkm	GA1d_2_fpkm	GA1d_3_fpkm	GA3d_1_fpkm	GA3d_2_fpkm	GA3d_3_fpkm	GA7d_1_fpkm	GA7d_2_fpkm	GA7d_3_fpkm	GA14dvsCK14d_GA14d
evm.TU.Contig154.374	499	562	572	585	363	904	397	599	429	604	563	445	834	1239	925	346	399	369	650	414	660	493	388	557	24.3095	24.9923	25.4026	24.3378	12.7969	45.5709	15.7325	26.1883	17.6387	26.4832	24.2658	18.4291	34.5662	54.8142	41.5885	14.9363	17.021	15.6432	28.9802	18.3931	29.135	21.5405	16.7839	25.25	968.766
evm.TU.Contig154.373	983	1169	1263	1692	1795	2114	1244	1317	968	1223	1551	1203	1735	2360	1816	1272	1090	1085	1279	1350	1283	1368	1282	1486	32.2092	34.9652	37.7257	47.3454	42.5612	71.6765	33.1574	38.7275	26.7692	36.0672	44.9624	33.509	48.3657	70.224	54.916	36.9323	31.2745	30.9373	38.354	40.3403	38.0934	40.202	37.2993	45.3082	1908.38
evm.TU.Contig184.641	1672	1674	1843	1437	1621	1169	1393	1480	1388	1579	1378	1619	1912	1661	1720	1489	1694	1661	1428	1347	1376	1726	1598	1741	74.1082	67.7298	74.4667	54.3923	51.9919	53.6154	50.2243	58.8706	51.9222	62.9899	54.0369	61.0023	72.0989	66.8569	70.3582	58.4813	65.7477	64.0656	57.9257	54.4473	55.2643	68.6129	62.8916	71.8058	1704.07
evm.TU.Contig139.110	2583	2357	2594	1030	1523	730	1335	1365	2498	2211	1801	2117	972	333	726	1074	1938	1734	575	999	794	1375	1101	978	43.1921	35.9778	39.5419	14.7085	18.429	12.6313	18.1591	20.4842	35.2538	33.2758	26.6443	30.0933	13.8279	5.05675	11.204	15.9139	28.3773	25.2322	8.79957	15.2344	12.0309	20.6214	16.3476	15.2177	650.746
evm.TU.Contig826.19	10726	9870	11464	5186	6194	3496	4660	5876	6890	9678	7010	7927	4431	2469	3956	4781	8919	7679	1840	2798	2238	5967	4515	3959	159.179	133.708	155.092	65.725	66.5182	53.6863	56.2556	78.2592	86.2979	129.268	92.0399	100.006	55.9448	33.2748	54.1826	62.8721	115.905	99.1692	24.9907	37.8681	30.0956	79.4215	59.4964	54.6718	3492.72
evm.TU.Contig21.241	0	0	0	0	0	0	1	0	0	0	0	0	0	0	0	0	0	0	0	0	0	0	0	0	0	0	0	0	0	0	0.0984927	0	0	0	0	0	0	0	0	0	0	0	0	0	0	0	0	0	NA
evm.TU.Contig45.353	0	0	0	0	0	0	0	0	0	0	0	0	0	0	0	0	0	0	0	0	0	0	0	0	0	0	0	0	0	0	0	0	0	0	0	0	0	0	0	0	0	0	0	0	0	0	0	0	NA
evm.TU.Contig368.29	0	0	0	0	0	0	0	0	0	0	0	0	0	0	0	0	0	0	0	0	0	0	0	0	0	0	0	0	0	0	0	0	0	0	0	0	0	0	0	0	0	0	0	0	0	0	0	0	NA
evm.TU.Contig55.18	59	68	39	495	641	535	123	131	78	132	210	147	184	568	279	160	63	34	1115	317	725	695	594	1220	11.651	12.2579	7.02076	83.4774	91.5995	109.323	19.7583	23.2162	12.9999	23.4609	36.6896	24.6774	30.913	101.861	50.8479	27.9979	10.8941	5.84274	201.512	57.0888	129.732	123.093	104.156	224.183	334.344
evm.TU.Contig54.62	0	0	0	0	0	0	0	0	0	1	1	0	0	1	2	0	0	0	0	0	0	0	3	0	0	0	0	0	0	0	0	0	0	0.0709249	0.0697189	0	0	0.0715627	0.145454	0	0	0	0	0	0	0	0.209917	0	1.00015
evm.TU.Contig421.431	379	274	225	247	342	196	331	241	295	272	220	282	239	192	152	346	304	265	201	280	247	198	233	195	19.8166	13.0778	10.7246	11.0291	12.9401	10.6045	14.0783	11.3087	13.018	12.8002	10.1771	12.5345	10.6316	9.11671	7.33483	16.0309	13.9188	12.0576	9.61833	13.3514	11.7026	9.28518	10.8176	9.48759	186.636
evm.TU.Contig602.28	52	69	46	19	29	1	74	37	82	68	22	22	76	112	42	12	16	22	33	13	51	6	35	16	2.36645	2.86641	1.90835	0.738412	0.955025	0.0470911	2.73942	1.51113	3.1495	2.78524	0.885784	0.851111	2.94251	4.6287	1.76401	0.483914	0.637605	0.871249	1.37443	0.539531	2.1031	0.244895	1.41432	0.677556	73.6746
evm.TU.Contig16.743	700	615	768	701	1096	458	872	557	639	780	604	575	705	511	696	637	559	817	566	570	580	733	601	827	31.596	25.3399	31.6011	27.0211	35.7987	21.3917	32.0172	22.563	24.3427	31.6875	24.1203	22.0633	27.0729	20.9461	28.9935	25.4781	22.0945	32.0909	23.3811	23.4632	23.7224	29.6738	24.0877	34.7353	616.447
evm.TU.Contig447.152	273	244	325	183	516	44	299	139	186	198	275	223	220	172	101	270	182	247	157	222	189	128	92	101	58.0577	47.3676	63.0068	33.2353	79.4089	9.68266	51.7251	26.5289	33.3844	37.8985	51.7417	40.3154	39.8044	33.2179	19.8233	50.8807	33.8927	45.7109	30.557	43.0555	36.4213	24.4142	17.3728	19.9871	157.097
evm.TU.Contig447.153	347	339	533	251	564	56	298	272	227	276	288	227	384	247	178	358	227	301	213	322	229	126	80	154	85.2742	76.047	119.405	52.676	100.297	14.2404	59.5713	59.9879	47.0812	61.0459	62.6169	47.4223	80.2842	55.1229	40.3705	77.9585	48.8485	64.3694	47.905	72.1643	50.9941	27.7711	17.4568	35.216	257.579
evm.TU.Contig341.499	1050	937	732	430	730	372	461	398	417	763	620	553	606	498	377	494	675	554	358	329	379	685	515	401	163.543	133.222	103.935	57.1955	82.2787	59.9556	58.4085	55.6329	54.8166	106.961	85.4368	73.2211	80.3019	70.4398	54.1926	68.1807	92.0626	75.0891	51.0315	46.7323	53.4906	95.6903	71.2255	58.1189	473.994
evm.TU.Contig166.53	477	560	628	516	397	215	570	541	1038	657	425	430	375	118	264	291	568	472	422	331	415	483	779	901	30.2868	32.4577	36.3498	27.9793	18.241	14.126	29.4404	30.8276	55.6246	37.5457	23.8746	23.2099	20.2571	6.804	15.4702	16.3727	31.5807	26.0797	24.5223	19.1665	23.877	27.5054	43.9196	53.2343	242.228
evm.TU.Contig184.134	1035	1340	1483	1683	2168	1118	2640	1297	1820	1218	1075	915	1064	1823	1331	1041	971	1305	1593	1360	839	1178	1364	1133	35.399	41.8359	46.2379	49.157	53.6577	39.5673	73.4491	39.8104	52.5358	37.4935	32.5289	26.6036	30.9601	56.6218	42.0131	31.5496	29.0808	38.8406	49.8631	42.4197	26.0021	36.1352	41.4238	36.0588	1365.34
evm.TU.Contig154.430_evm.TU.Contig154.431	1013	1091	1191	959	1951	814	1194	925	1045	1085	1168	951	1122	1219	1253	899	746	1028	927	993	715	973	1025	910	29.0468	28.5567	31.132	23.4832	40.4826	24.1523	27.85	23.8033	25.2894	28.0012	29.6307	23.1813	27.3711	31.7423	33.1586	22.8423	18.7312	25.6511	24.3266	25.9667	18.5777	25.0228	26.0975	24.2807	1161.42
evm.TU.Contig1.27	967	1150	1336	838	1271	991	1095	1076	956	921	1028	953	1435	1365	1336	1040	1126	1374	1035	1012	907	916	958	1062	22.0944	23.9854	27.8271	16.3512	21.0147	23.4301	20.3518	22.0635	18.4352	18.9397	20.7807	18.5105	27.8945	28.3227	28.172	21.0562	22.5284	27.3191	21.6426	21.087	18.7784	18.7709	19.436	22.5793	1332.48
evm.TU.Contig540.23	0	0	0	0	0	0	0	0	0	0	0	0	0	0	0	0	0	0	0	0	0	0	0	0	0	0	0	0	0	0	0	0	0	0	0	0	0	0	0	0	0	0	0	0	0	0	0	0	NA
evm.TU.Contig60.38	276	278	445	463	550	327	428	477	292	401	375	322	261	203	222	217	233	311	315	434	519	237	214	188	6.74266	6.19957	9.91035	9.65949	9.72315	8.26637	8.50547	10.458	6.02058	8.8171	8.10521	6.68724	5.42467	4.50365	5.00531	4.69758	4.98443	6.61162	7.04281	9.6692	11.4891	5.19285	4.64218	4.27377	220.613
evm.TU.Contig394.15	855	963	936	1008	736	880	935	870	535	1086	760	1052	864	1276	1060	676	844	759	583	626	832	524	502	523	21.7026	22.3135	21.6585	21.8503	13.5191	23.1139	19.3059	19.8186	11.4613	24.8105	17.0675	22.7003	18.6582	29.4133	24.8318	15.205	18.7597	16.7654	13.5434	14.491	19.1367	11.9292	11.3145	12.3532	1035.6
evm.TU.Contig52.55	260	391	361	289	361	281	367	411	346	310	322	285	427	455	445	297	280	351	371	368	367	277	298	298	6.68142	9.17206	8.45687	6.34227	6.71313	7.47217	7.67175	9.47859	7.50422	7.16995	7.32086	6.22601	9.33543	10.6183	10.5539	6.76308	6.30073	7.84925	8.72535	8.62427	8.5459	6.38426	6.79982	7.12595	428.34
evm.TU.Contig28.278	63	101	52	39	66	49	43	14	49	62	53	63	26	45	63	67	32	83	23	18	18	35	56	16	1.435	2.10004	1.07975	0.758625	1.08787	1.15492	0.796732	0.286184	0.941979	1.27105	1.06807	1.21989	0.503843	0.930831	1.32437	1.35232	0.638262	1.64518	0.47946	0.373906	0.371518	0.715014	1.13262	0.339127	43.8239
evm.TU.Contig45.115	0	0	0	0	0	0	0	0	0	0	0	0	0	0	0	0	0	0	0	0	0	0	0	0	0	0	0	0	0	0	0	0	0	0	0	0	0	0	0	0	0	0	0	0	0	0	0	0	NA
evm.TU.Contig45.114	0	0	0	0	0	0	0	0	0	0	0	0	0	0	0	0	0	0	0	0	1	0	1	0	0	0	0	0	0	0	0	0	0	0	0	0	0	0	0	0	0	0	0	0	0.133609	0	0.130926	0	NA
evm.TU.Contig180.433	558	545	514	600	688	475	661	558	624	630	619	700	604	540	480	699	717	633	433	563	455	521	601	491	18.7559	16.7223	15.7498	17.2229	16.7346	16.5213	18.0734	16.8324	17.702	19.0592	18.408	20.0019	17.2724	16.4833	14.8903	20.8197	21.1038	18.5154	13.3201	17.2581	13.8584	15.7064	17.9376	15.3574	521.819
evm.TU.Contig100.12	274	244	500	282	754	239	502	651	233	369	424	232	181	144	65	195	225	359	123	307	231	254	121	248	6.03397	4.90498	10.0376	5.30338	12.0156	5.44622	8.99268	12.8659	4.33054	7.31372	8.26094	4.3432	3.39111	2.8798	1.32106	3.80522	4.33883	6.87974	2.47897	6.16552	4.60958	5.01674	2.36605	5.08201	123.929
evm.TU.Contig60.171	396	388	343	260	204	127	123	179	147	293	233	286	29	27	65	141	217	209	41	122	47	63	87	42	14.8448	13.2771	11.7214	8.32344	5.5339	4.92637	3.75073	6.02196	4.65082	9.88565	7.72761	9.1141	0.924884	0.919156	2.24879	4.68371	7.12321	6.81789	1.40662	4.17078	1.59651	2.11814	2.8959	1.46507	39.5996
evm.TU.Contig184.317	1012	1157	1493	496	704	752	268	434	435	956	786	1093	74	45	86	473	949	853	27	205	142	258	239	120	63.4069	66.1734	85.2752	26.5392	31.9191	48.7549	13.6591	24.4035	23.0027	53.9104	43.5702	58.2164	3.94456	2.56044	4.97291	26.2609	52.0666	46.5083	1.54822	11.7135	8.06196	14.4981	13.2966	6.9963	66.2938
evm.TU.Contig81.307	172	226	320	409	412	295	244	334	344	288	174	287	149	155	112	284	348	376	94	240	158	137	195	99	16.7584	20.1005	28.4225	34.0313	29.0485	29.7421	19.3387	29.205	28.2876	25.2555	14.9991	23.7715	12.351	13.7146	10.0712	24.5197	29.6908	31.88	8.38197	21.3253	13.9495	11.9718	16.8704	8.97575	133.601
evm.TU.Contig22.28	0	0	0	0	0	0	0	0	0	1	0	0	0	0	3	0	0	3	0	0	0	0	0	0	0	0	0	0	0	0	0	0	0	0.0779619	0	0	0	0	0.239828	0	0	0.226136	0	0	0	0	0	0	1.0153
evm.TU.Contig296.61	10	21	11	22	39	9	17	18	18	28	24	23	12	6	12	37	26	53	6	14	5	17	19	13	1.3165	2.52368	1.32014	2.4734	3.71542	1.22605	1.82055	2.12667	1.99999	3.31771	2.7954	2.57406	1.34404	0.717331	1.458	4.31634	2.99731	6.07187	0.722913	1.68085	0.596469	2.00727	2.22106	1.59256	9.67238
evm.TU.Contig888.1	0	0	0	2	0	0	0	0	0	2	0	0	0	0	0	1	1	0	0	0	0	0	0	0	0	0	0	0.323791	0	0	0	0	0	0.34125	0	0	0	0	0	0.167987	0.166005	0	0	0	0	0	0	0	NA
evm.TU.Contig20.65	0	0	0	0	0	0	0	0	0	2	0	2	0	0	0	0	0	0	0	0	0	0	0	0	0	0	0	0	0	0	0	0	0	0.219959	0	0.207755	0	0	0	0	0	0	0	0	0	0	0	0	NA
evm.TU.Contig366.14	921	935	1798	1331	1103	1177	797	820	1205	1461	770	1183	125	161	115	1156	1753	1505	176	771	569	341	346	276	42.2906	39.1913	75.2629	52.1931	36.6507	55.9249	29.7697	33.7912	46.6987	60.38	31.2814	46.1783	4.8832	6.71362	4.87347	47.0364	70.4861	60.1375	7.39622	32.2862	23.6751	14.0434	14.1074	11.793	129.213
evm.TU.Contig421.315	2825	3103	3344	4480	3250	3829	2359	1327	1487	2960	2348	3146	2360	3224	1946	3380	3221	3167	2108	2691	2306	2656	2698	1720	83.9049	84.1289	90.5403	113.631	69.8513	117.679	56.994	35.3709	37.2746	79.126	61.6989	79.4322	59.6337	86.9582	53.3418	88.9565	83.7716	81.8544	57.2997	72.8889	62.0618	70.7509	71.1535	47.5366	2422.91
evm.TU.Contig78.8	338	437	524	445	350	308	279	264	300	569	180	371	286	683	402	532	579	427	763	313	581	369	484	399	15.3714	18.1415	21.7238	17.2825	11.5183	14.4941	10.3213	10.7747	11.5147	23.2899	7.24236	14.343	11.0656	28.2075	16.8725	21.4388	23.0575	16.8986	31.7566	12.9813	23.9425	15.0507	19.5446	16.885	444.356
evm.TU.Contig21.168	212	233	402	147	197	591	172	98	90	288	242	177	235	685	212	306	459	311	243	226	331	114	338	260	6.38518	6.40601	11.0375	3.78099	4.29364	18.4192	4.21404	2.64893	2.28778	7.80709	6.44857	4.53189	6.02166	18.7359	5.89291	8.16679	12.1056	8.15123	6.69818	6.20761	9.03362	3.07948	9.0394	7.28688	365.096
evm.TU.Contig481.58	57	34	43	5	26	5	47	20	39	36	26	28	2	4	10	8	20	25	2	2	1	24	25	10	3.77073	2.05317	2.59314	0.28247	1.24465	0.342268	2.52919	1.18737	2.17745	2.14345	1.52172	1.57463	0.112562	0.240302	0.61053	0.468957	1.15856	1.43918	0.121086	0.120659	0.0599442	1.42396	1.46851	0.615576	5.28939
evm.TU.Contig555.567	4685	5731	4875	2566	4304	1483	3841	2890	4166	4997	3680	4571	6041	3170	5277	4607	6336	5462	4378	3193	3210	5846	5663	6376	102.289	114.221	97.0293	47.8441	68.0011	33.5048	68.2179	56.6272	76.7669	98.195	71.0853	84.8402	112.212	62.8532	106.332	89.1316	121.136	103.776	87.4803	63.5768	63.5071	114.476	109.788	129.539	4659.01
evm.TU.Contig612.14	758	689	770	492	697	267	732	629	659	577	509	496	331	232	196	489	751	688	425	491	253	577	379	297	52.0648	43.2005	48.2139	28.8596	34.6442	18.9771	40.8995	38.7732	38.2027	35.6705	30.9317	28.9618	19.3425	14.4714	12.4247	29.7629	45.1702	41.1233	26.7163	30.7564	15.7468	35.5456	23.1153	18.9829	242.606
evm.TU.Contig421.203	228	213	195	187	227	142	141	133	120	188	160	92	434	535	184	238	203	167	257	90	144	143	154	169	7.14267	6.09116	5.56888	5.00286	5.14605	4.60319	3.59317	3.73924	3.17279	5.30082	4.43462	2.45009	11.5672	15.2204	5.31986	6.60686	5.56877	4.55268	7.36839	2.57127	4.08775	4.01788	4.28383	4.92656	368.013
evm.TU.Contig81.1257	1748	1783	1543	719	1212	542	1609	1073	1831	1154	773	949	1301	768	772	1209	2202	1613	1308	1188	795	1337	1012	983	81.7355	76.1054	65.7722	28.7111	41.0104	26.2249	61.2009	45.0273	72.2589	48.5662	31.9786	37.7229	51.7556	32.612	33.3152	50.0943	90.1621	65.634	55.9745	50.6599	33.6847	56.0707	42.018	42.7714	907.601
evm.TU.Contig341.256	690	662	685	323	654	438	461	411	389	573	474	422	728	740	480	625	597	538	660	399	542	563	555	522	32.7487	28.6812	29.6375	13.0918	22.4618	21.5111	17.7983	17.5062	15.5822	24.477	19.9037	17.0265	29.3959	31.895	21.0253	26.2856	24.8117	22.2204	28.6683	17.2702	23.3099	23.9656	23.3896	23.054	624.414
evm.TU.Contig421.314	407	523	565	420	605	495	468	339	397	398	347	636	377	695	370	583	578	474	431	574	335	485	458	420	14.4412	16.9397	18.2753	12.7265	15.5342	18.1744	13.5079	10.7948	11.8887	12.7102	10.8931	19.1839	11.3805	22.3945	12.1163	18.3304	17.9587	14.6357	13.9959	18.5738	10.7709	15.4343	14.4298	13.8673	465.248
evm.TU.Contig81.96	3447	4199	3450	3179	4866	2891	4748	4124	5038	4451	3240	4178	7062	4511	7372	3827	5191	5218	6798	6549	6563	4679	5825	4454	315.033	350.312	287.436	248.117	321.818	273.406	352.987	338.252	388.604	366.127	261.982	324.603	549.103	374.399	621.809	309.932	415.436	414.997	568.604	545.845	543.518	383.533	472.712	378.788	6113.93
evm.TU.Contig46.89	1	4	0	6	2	0	6	0	5	4	1	3	6	0	27	12	35	24	35	4	16	7	12	6	0.0833564	0.304364	0	0.427111	0.12064	0	0.406839	0	0.351757	0.300094	0.0737479	0.212583	0.425501	0	2.07711	0.886365	2.55473	1.74091	2.67005	0.304073	1.20852	0.523325	0.88819	0.465394	10.9735
evm.TU.Contig21.167	0	11	0	1	0	3	4	0	3	11	0	5	17	0	95	8	29	9	4	1	3	4	37	8	0	0.569934	0	0.0484717	0	0.176199	0.184684	0	0.143712	0.561939	0	0.241255	0.820913	0	4.97642	0.402365	1.44136	0.444534	0.207783	0.0517626	0.154296	0.203626	1.86477	0.422531	37.3525
evm.TU.Contig967.229	2052	2532	2662	5545	4625	4773	4699	3763	4250	3441	2744	2473	1340	3921	2226	4245	1743	3007	5046	3732	3045	3159	2382	2578	42.2051	47.5385	49.9117	97.3957	68.837	101.584	78.6186	69.4589	73.7751	63.6988	49.9324	43.2395	23.4479	73.2371	42.2541	77.3673	31.3922	53.8203	94.9835	70.0016	56.7507	58.2736	43.5026	49.3403	2430.93
evm.TU.Contig55.251	1558	1655	1286	791	1556	2983	991	856	1466	1426	1315	1773	2279	2079	1869	2289	2156	1052	1445	1497	1347	1957	2267	2334	120.065	116.424	90.3434	52.0566	86.7722	237.874	62.1234	59.201	95.349	98.9071	89.6572	116.152	149.418	145.496	132.927	156.31	145.491	70.5488	101.913	105.208	94.0617	135.262	155.126	167.371	2001.91
evm.TU.Contig447.342	2710	3704	2155	1907	2162	1691	2169	1317	2916	3419	2898	3510	3683	2161	4194	2501	4158	2570	2838	2764	2106	3497	5300	3492	126.008	157.215	91.3444	75.7233	72.7455	81.361	82.0389	54.9566	114.432	143.082	119.217	138.741	145.694	91.2493	179.975	103.047	169.297	103.989	120.768	117.205	88.7325	145.834	218.821	151.089	3244.84
evm.TU.Contig78.7	689	1124	788	538	618	339	458	309	801	1115	564	1162	1202	681	1853	659	1301	811	1110	642	801	1239	1733	1860	55.4137	82.5199	57.7738	36.9514	35.9674	28.2126	29.9637	22.303	54.3706	80.7108	40.1317	79.4462	82.2457	49.7384	137.54	46.9651	91.6247	56.7602	81.7023	47.0882	58.375	89.3726	123.761	139.201	1215.03
evm.TU.Contig341.354	427	391	339	581	981	566	581	381	449	543	717	672	500	432	682	483	503	645	623	439	503	589	605	619	29.1483	24.3645	21.0956	33.8698	48.4593	39.9804	32.2622	23.3409	25.8682	33.3614	43.3028	38.9963	29.038	26.7803	42.9661	29.2163	30.0671	38.3151	38.9213	27.3293	31.1136	36.0608	36.6713	39.3194	523.448
evm.TU.Contig96.99	36	40	34	71	71	80	25	101	23	23	30	16	7	41	24	55	69	97	113	208	27	20	155	25	2.05919	2.08857	1.77288	3.46819	2.93883	4.73509	1.16323	5.18468	1.11034	1.18408	1.51819	0.778006	0.340645	2.12973	1.26696	2.78772	3.45605	4.82826	5.91542	10.8502	1.39944	1.02603	7.87248	1.33065	23.5187
evm.TU.Contig180.201	12632	12408	11328	9350	12360	6095	12357	8183	12436	11355	11541	12017	12402	8817	9789	8432	10228	8870	9835	10158	7993	9741	10970	8228	409.055	366.78	334.403	258.567	289.635	204.234	325.503	237.809	339.879	330.945	330.647	330.807	341.674	259.285	292.553	241.954	290.027	249.953	291.473	299.983	234.54	282.91	315.429	247.933	9957.78
evm.TU.Contig21.98	2553	3081	3629	3119	4232	2323	2823	3077	2770	2245	2456	2300	2223	1759	1272	2555	2543	3171	2260	3001	2396	1573	1516	1138	104.436	115.05	135.33	108.96	125.276	98.332	93.9387	112.963	95.6345	82.6564	88.8874	79.983	77.3662	65.3452	48.0225	92.6156	91.093	112.881	84.6102	111.956	88.8146	57.7118	55.0663	43.3186	1679.28
evm.TU.Contig553.95	10175	11879	11250	8512	10952	6677	9540	7642	9619	9034	7764	9560	3416	3830	2532	8342	8910	9573	7674	9194	6413	7946	5353	5201	360.068	383.729	362.919	257.237	280.457	244.499	274.62	242.697	287.286	287.733	243.079	287.592	102.844	123.082	82.6934	261.585	276.1	294.798	248.534	296.711	205.64	252.194	168.203	171.265	3140.23
evm.TU.Contig437.88	6	10	16	46	32	9	18	23	5	11	23	11	14	16	13	28	14	14	23	55	34	5	9	2	0.178685	0.271851	0.434374	1.16989	0.689619	0.277347	0.436056	0.614711	0.125673	0.294841	0.606004	0.278483	0.354712	0.432716	0.357303	0.738902	0.365092	0.362819	0.626871	1.49375	0.917512	0.133549	0.237993	0.055424	13.8556
evm.TU.Contig906.305	63	50	36	30	44	3	10	18	26	20	21	25	9	0	7	26	54	45	26	9	14	4	13	6	3.31758	2.40351	1.72819	1.34913	1.6767	0.163473	0.428365	0.850668	1.15555	0.947917	0.978389	1.11916	0.403213	0	0.340201	1.21324	2.49008	2.06214	1.25305	0.432218	0.668045	0.188919	0.60787	0.294011	5.12265
evm.TU.Contig180.399	39	12	19	66	46	7	21	9	7	10	6	20	17	27	5	28	83	39	21	22	25	16	11	9	1.52938	0.429563	0.679223	2.21028	1.30536	0.28405	0.66989	0.316738	0.231677	0.352948	0.208168	0.666731	0.567167	0.961528	0.180958	0.972976	2.85015	1.33089	0.753675	0.786779	0.888358	0.562738	0.383027	0.328417	15.6221
evm.TU.Contig447.341	150	248	211	335	389	406	401	469	463	319	165	305	271	410	364	696	684	407	893	618	776	338	502	311	14.6796	22.1548	18.824	27.9974	27.5483	41.1143	31.9227	41.1909	38.2417	28.0978	14.2862	25.3741	22.5633	36.4379	32.8761	60.3565	58.6159	34.6611	79.981	55.1556	68.8145	29.667	43.6226	28.3213	338.65
evm.TU.Contig341.355	372	502	432	438	164	235	353	175	342	445	179	545	449	179	532	337	685	422	442	259	477	346	555	402	19.3439	23.8286	20.4782	19.4503	6.17117	12.6449	14.9317	8.16668	15.0093	20.8267	8.23503	24.0917	19.8636	8.45281	25.5311	15.5283	31.191	19.0958	21.0347	12.2823	22.4758	16.1366	25.6259	19.4517	375.289
evm.TU.Contig12.386	4318	5067	4482	4211	6869	2541	4938	4081	5368	4075	3381	4359	7315	6044	5504	6371	7714	6516	5519	4726	4413	5618	4892	6364	155.964	167.066	147.578	129.891	179.539	94.9713	145.086	132.287	163.64	132.474	108.044	133.844	224.785	198.25	183.475	203.912	243.983	204.809	182.438	155.674	144.435	181.995	156.897	213.897	6054.73
evm.TU.Contig66.959	2149	2439	2329	2780	4193	3186	3027	2375	3291	2420	2324	2330	2654	2408	2055	3072	3183	3043	3309	2963	2028	2613	2329	2844	74.4983	77.182	73.6015	82.3011	105.186	114.288	85.3601	73.889	96.2878	75.5065	71.2782	68.6649	78.2747	75.8077	65.7473	94.3677	96.6238	91.7988	104.983	93.6743	63.7051	81.2427	71.6911	91.7425	2285.95
evm.TU.Contig66.765	3056	3860	4277	3885	2608	1651	4019	2716	3187	4111	3593	3039	1068	1056	1053	1402	2610	3874	2326	2273	1493	2324	2363	1458	143.2	165.109	182.698	155.464	88.4339	80.0535	153.193	114.215	126.039	173.378	148.956	121.057	42.5766	44.9365	45.5379	58.2142	107.094	157.97	99.7497	97.133	63.3935	97.6697	98.3191	63.5736	1024.52
evm.TU.Contig14.214	193	189	335	386	297	195	599	623	610	212	231	190	174	122	230	314	299	352	265	271	252	128	151	133	3.65987	3.27163	5.79108	6.25095	4.07556	3.82637	9.2399	10.6024	9.76273	3.61829	3.87553	3.06288	2.80716	2.10094	4.02524	5.27631	4.96497	5.80866	4.59904	4.68658	4.33017	2.17697	2.54256	2.34688	170.517
evm.TU.Contig555.175	124	113	183	140	158	65	220	260	148	118	136	101	73	72	40	105	91	126	60	61	67	56	38	72	2.58486	2.15025	3.47755	2.49226	2.38339	1.40208	3.73053	4.86402	2.60382	2.21389	2.50822	1.7898	1.29464	1.363	0.769541	1.93953	1.66109	2.28566	1.14467	1.15964	1.26557	1.04698	0.703371	1.39662	59.1485
evm.TU.Contig16.348	2669	2967	3281	3985	3842	3447	3184	3160	3132	3278	3797	3380	4092	5143	3585	3738	3171	3548	4149	3156	3766	3132	3669	3672	33.0891	33.5775	37.0808	42.1905	34.468	44.2203	32.1101	35.1584	32.7711	36.5766	41.6473	35.6223	43.1601	57.9027	41.0186	41.0646	34.4246	38.2776	47.0752	35.6822	42.307	34.8251	40.3896	42.3613	4127.9
evm.TU.Contig259.62	0	0	0	0	0	0	0	0	0	0	0	0	0	0	0	0	0	0	2	0	0	0	0	0	0	0	0	0	0	0	0	0	0	0	0	0	0	0	0	0	0	0	0.203433	0	0	0	0	0	NA
evm.TU.Contig694.19	1286	1360	1466	1811	1729	1216	1620	1241	1598	1313	1530	1407	1335	1586	1528	1404	1314	1526	1530	1199	1146	1228	1557	974	26.3034	25.3924	27.3346	31.633	25.5911	25.7365	26.9537	22.7798	27.5855	24.171	27.6868	24.4644	23.2307	29.4592	28.8437	25.4466	23.5344	27.1613	28.6402	22.365	21.2399	22.5271	28.2778	18.5379	1438.31
evm.TU.Contig481.18_evm.TU.Contig481.19	490	595	589	492	749	272	735	849	515	490	565	378	418	325	281	316	287	354	432	465	484	406	315	286	9.70227	10.7545	10.6316	8.31943	10.732	5.57303	11.8385	15.0866	8.60634	8.73238	9.89776	6.36265	7.04149	5.84396	5.135	5.54443	4.97619	6.09966	7.82843	8.39671	8.68399	7.21005	5.53826	5.26956	328.057
evm.TU.Contig565.34	197	236	331	238	311	167	406	310	191	228	241	149	318	275	133	176	152	244	303	203	228	153	138	114	4.69852	5.13808	7.19664	4.84755	5.36757	4.12151	7.87687	6.63533	3.84469	4.89428	5.08537	3.021	6.45257	5.95627	2.92754	3.71963	3.1745	5.06419	6.61379	4.41539	4.92749	3.27281	2.92253	2.53006	231.209
evm.TU.Contig259.97	0	0	0	0	0	0	0	0	0	0	0	0	0	0	0	0	0	0	0	0	0	0	0	0	0	0	0	0	0	0	0	0	0	0	0	0	0	0	0	0	0	0	0	0	0	0	0	0	NA
evm.TU.Contig139.286	60	39	56	65	16	8	27	48	48	48	50	43	26	20	43	6	17	13	34	30	36	40	22	33	4.8788	2.89482	4.15104	4.51363	0.941465	0.673126	1.7859	3.50275	3.2941	3.51287	3.59702	2.97234	1.79865	1.47686	3.22691	0.43232	1.21045	0.919878	2.53019	2.22465	2.65253	2.91714	1.58844	2.49693	28.9732
evm.TU.Contig421.315	2825	3103	3344	4480	3250	3829	2359	1327	1487	2960	2348	3146	2360	3224	1946	3380	3221	3167	2108	2691	2306	2656	2698	1720	83.9049	84.1289	90.5403	113.631	69.8513	117.679	56.994	35.3709	37.2746	79.126	61.6989	79.4322	59.6337	86.9582	53.3418	88.9565	83.7716	81.8544	57.2997	72.8889	62.0618	70.7509	71.1535	47.5366	2422.91
evm.TU.Contig78.8	338	437	524	445	350	308	279	264	300	569	180	371	286	683	402	532	579	427	763	313	581	369	484	399	15.3714	18.1415	21.7238	17.2825	11.5183	14.4941	10.3213	10.7747	11.5147	23.2899	7.24236	14.343	11.0656	28.2075	16.8725	21.4388	23.0575	16.8986	31.7566	12.9813	23.9425	15.0507	19.5446	16.885	444.356
evm.TU.Contig21.168	212	233	402	147	197	591	172	98	90	288	242	177	235	685	212	306	459	311	243	226	331	114	338	260	6.38518	6.40601	11.0375	3.78099	4.29364	18.4192	4.21404	2.64893	2.28778	7.80709	6.44857	4.53189	6.02166	18.7359	5.89291	8.16679	12.1056	8.15123	6.69818	6.20761	9.03362	3.07948	9.0394	7.28688	365.096
evm.TU.Contig481.58	57	34	43	5	26	5	47	20	39	36	26	28	2	4	10	8	20	25	2	2	1	24	25	10	3.77073	2.05317	2.59314	0.28247	1.24465	0.342268	2.52919	1.18737	2.17745	2.14345	1.52172	1.57463	0.112562	0.240302	0.61053	0.468957	1.15856	1.43918	0.121086	0.120659	0.0599442	1.42396	1.46851	0.615576	5.28939
evm.TU.Contig555.567	4685	5731	4875	2566	4304	1483	3841	2890	4166	4997	3680	4571	6041	3170	5277	4607	6336	5462	4378	3193	3210	5846	5663	6376	102.289	114.221	97.0293	47.8441	68.0011	33.5048	68.2179	56.6272	76.7669	98.195	71.0853	84.8402	112.212	62.8532	106.332	89.1316	121.136	103.776	87.4803	63.5768	63.5071	114.476	109.788	129.539	4659.01
evm.TU.Contig612.14	758	689	770	492	697	267	732	629	659	577	509	496	331	232	196	489	751	688	425	491	253	577	379	297	52.0648	43.2005	48.2139	28.8596	34.6442	18.9771	40.8995	38.7732	38.2027	35.6705	30.9317	28.9618	19.3425	14.4714	12.4247	29.7629	45.1702	41.1233	26.7163	30.7564	15.7468	35.5456	23.1153	18.9829	242.606
evm.TU.Contig421.203	228	213	195	187	227	142	141	133	120	188	160	92	434	535	184	238	203	167	257	90	144	143	154	169	7.14267	6.09116	5.56888	5.00286	5.14605	4.60319	3.59317	3.73924	3.17279	5.30082	4.43462	2.45009	11.5672	15.2204	5.31986	6.60686	5.56877	4.55268	7.36839	2.57127	4.08775	4.01788	4.28383	4.92656	368.013
evm.TU.Contig81.1257	1748	1783	1543	719	1212	542	1609	1073	1831	1154	773	949	1301	768	772	1209	2202	1613	1308	1188	795	1337	1012	983	81.7355	76.1054	65.7722	28.7111	41.0104	26.2249	61.2009	45.0273	72.2589	48.5662	31.9786	37.7229	51.7556	32.612	33.3152	50.0943	90.1621	65.634	55.9745	50.6599	33.6847	56.0707	42.018	42.7714	907.601
evm.TU.Contig341.256	690	662	685	323	654	438	461	411	389	573	474	422	728	740	480	625	597	538	660	399	542	563	555	522	32.7487	28.6812	29.6375	13.0918	22.4618	21.5111	17.7983	17.5062	15.5822	24.477	19.9037	17.0265	29.3959	31.895	21.0253	26.2856	24.8117	22.2204	28.6683	17.2702	23.3099	23.9656	23.3896	23.054	624.414
evm.TU.Contig421.314	407	523	565	420	605	495	468	339	397	398	347	636	377	695	370	583	578	474	431	574	335	485	458	420	14.4412	16.9397	18.2753	12.7265	15.5342	18.1744	13.5079	10.7948	11.8887	12.7102	10.8931	19.1839	11.3805	22.3945	12.1163	18.3304	17.9587	14.6357	13.9959	18.5738	10.7709	15.4343	14.4298	13.8673	465.248
evm.TU.Contig81.96	3447	4199	3450	3179	4866	2891	4748	4124	5038	4451	3240	4178	7062	4511	7372	3827	5191	5218	6798	6549	6563	4679	5825	4454	315.033	350.312	287.436	248.117	321.818	273.406	352.987	338.252	388.604	366.127	261.982	324.603	549.103	374.399	621.809	309.932	415.436	414.997	568.604	545.845	543.518	383.533	472.712	378.788	6113.93
evm.TU.Contig46.89	1	4	0	6	2	0	6	0	5	4	1	3	6	0	27	12	35	24	35	4	16	7	12	6	0.0833564	0.304364	0	0.427111	0.12064	0	0.406839	0	0.351757	0.300094	0.0737479	0.212583	0.425501	0	2.07711	0.886365	2.55473	1.74091	2.67005	0.304073	1.20852	0.523325	0.88819	0.465394	10.9735
evm.TU.Contig21.167	0	11	0	1	0	3	4	0	3	11	0	5	17	0	95	8	29	9	4	1	3	4	37	8	0	0.569934	0	0.0484717	0	0.176199	0.184684	0	0.143712	0.561939	0	0.241255	0.820913	0	4.97642	0.402365	1.44136	0.444534	0.207783	0.0517626	0.154296	0.203626	1.86477	0.422531	37.3525
evm.TU.Contig967.229	2052	2532	2662	5545	4625	4773	4699	3763	4250	3441	2744	2473	1340	3921	2226	4245	1743	3007	5046	3732	3045	3159	2382	2578	42.2051	47.5385	49.9117	97.3957	68.837	101.584	78.6186	69.4589	73.7751	63.6988	49.9324	43.2395	23.4479	73.2371	42.2541	77.3673	31.3922	53.8203	94.9835	70.0016	56.7507	58.2736	43.5026	49.3403	2430.93
evm.TU.Contig55.25	221	187	162	1185	922	2846	988	569	534	435	376	510	365	1113	478	1917	663	580	1157	1508	1086	338	234	538	6.86825	5.30506	4.58961	31.4502	20.7352	91.5237	24.9772	15.8698	14.0065	12.1675	10.3384	13.4739	9.65067	31.412	13.71	52.792	18.0428	15.6858	32.9079	42.74	30.583	9.42119	6.45737	15.5585	633.259
evm.TU.Contig447.342	2710	3704	2155	1907	2162	1691	2169	1317	2916	3419	2898	3510	3683	2161	4194	2501	4158	2570	2838	2764	2106	3497	5300	3492	126.008	157.215	91.3444	75.7233	72.7455	81.361	82.0389	54.9566	114.432	143.082	119.217	138.741	145.694	91.2493	179.975	103.047	169.297	103.989	120.768	117.205	88.7325	145.834	218.821	151.089	3244.84
evm.TU.Contig78.7	689	1124	788	538	618	339	458	309	801	1115	564	1162	1202	681	1853	659	1301	811	1110	642	801	1239	1733	1860	55.4137	82.5199	57.7738	36.9514	35.9674	28.2126	29.9637	22.303	54.3706	80.7108	40.1317	79.4462	82.2457	49.7384	137.54	46.9651	91.6247	56.7602	81.7023	47.0882	58.375	89.3726	123.761	139.201	1215.03
evm.TU.Contig341.354	427	391	339	581	981	566	581	381	449	543	717	672	500	432	682	483	503	645	623	439	503	589	605	619	29.1483	24.3645	21.0956	33.8698	48.4593	39.9804	32.2622	23.3409	25.8682	33.3614	43.3028	38.9963	29.038	26.7803	42.9661	29.2163	30.0671	38.3151	38.9213	27.3293	31.1136	36.0608	36.6713	39.3194	523.448
evm.TU.Contig96.99	36	40	34	71	71	80	25	101	23	23	30	16	7	41	24	55	69	97	113	208	27	20	155	25	2.05919	2.08857	1.77288	3.46819	2.93883	4.73509	1.16323	5.18468	1.11034	1.18408	1.51819	0.778006	0.340645	2.12973	1.26696	2.78772	3.45605	4.82826	5.91542	10.8502	1.39944	1.02603	7.87248	1.33065	23.5187
evm.TU.Contig180.201	12632	12408	11328	9350	12360	6095	12357	8183	12436	11355	11541	12017	12402	8817	9789	8432	10228	8870	9835	10158	7993	9741	10970	8228	409.055	366.78	334.403	258.567	289.635	204.234	325.503	237.809	339.879	330.945	330.647	330.807	341.674	259.285	292.553	241.954	290.027	249.953	291.473	299.983	234.54	282.91	315.429	247.933	9957.78
evm.TU.Contig21.98	2553	3081	3629	3119	4232	2323	2823	3077	2770	2245	2456	2300	2223	1759	1272	2555	2543	3171	2260	3001	2396	1573	1516	1138	104.436	115.05	135.33	108.96	125.276	98.332	93.9387	112.963	95.6345	82.6564	88.8874	79.983	77.3662	65.3452	48.0225	92.6156	91.093	112.881	84.6102	111.956	88.8146	57.7118	55.0663	43.3186	1679.28
evm.TU.Contig553.95	10175	11879	11250	8512	10952	6677	9540	7642	9619	9034	7764	9560	3416	3830	2532	8342	8910	9573	7674	9194	6413	7946	5353	5201	360.068	383.729	362.919	257.237	280.457	244.499	274.62	242.697	287.286	287.733	243.079	287.592	102.844	123.082	82.6934	261.585	276.1	294.798	248.534	296.711	205.64	252.194	168.203	171.265	3140.23
evm.TU.Contig437.88	6	10	16	46	32	9	18	23	5	11	23	11	14	16	13	28	14	14	23	55	34	5	9	2	0.178685	0.271851	0.434374	1.16989	0.689619	0.277347	0.436056	0.614711	0.125673	0.294841	0.606004	0.278483	0.354712	0.432716	0.357303	0.738902	0.365092	0.362819	0.626871	1.49375	0.917512	0.133549	0.237993	0.055424	13.8556
evm.TU.Contig906.305	63	50	36	30	44	3	10	18	26	20	21	25	9	0	7	26	54	45	26	9	14	4	13	6	3.31758	2.40351	1.72819	1.34913	1.6767	0.163473	0.428365	0.850668	1.15555	0.947917	0.978389	1.11916	0.403213	0	0.340201	1.21324	2.49008	2.06214	1.25305	0.432218	0.668045	0.188919	0.60787	0.294011	5.12265
evm.TU.Contig180.399	39	12	19	66	46	7	21	9	7	10	6	20	17	27	5	28	83	39	21	22	25	16	11	9	1.52938	0.429563	0.679223	2.21028	1.30536	0.28405	0.66989	0.316738	0.231677	0.352948	0.208168	0.666731	0.567167	0.961528	0.180958	0.972976	2.85015	1.33089	0.753675	0.786779	0.888358	0.562738	0.383027	0.328417	15.6221
evm.TU.Contig447.341	150	248	211	335	389	406	401	469	463	319	165	305	271	410	364	696	684	407	893	618	776	338	502	311	14.6796	22.1548	18.824	27.9974	27.5483	41.1143	31.9227	41.1909	38.2417	28.0978	14.2862	25.3741	22.5633	36.4379	32.8761	60.3565	58.6159	34.6611	79.981	55.1556	68.8145	29.667	43.6226	28.3213	338.65
evm.TU.Contig341.355	372	502	432	438	164	235	353	175	342	445	179	545	449	179	532	337	685	422	442	259	477	346	555	402	19.3439	23.8286	20.4782	19.4503	6.17117	12.6449	14.9317	8.16668	15.0093	20.8267	8.23503	24.0917	19.8636	8.45281	25.5311	15.5283	31.191	19.0958	21.0347	12.2823	22.4758	16.1366	25.6259	19.4517	375.289
evm.TU.Contig12.386	4318	5067	4482	4211	6869	2541	4938	4081	5368	4075	3381	4359	7315	6044	5504	6371	7714	6516	5519	4726	4413	5618	4892	6364	155.964	167.066	147.578	129.891	179.539	94.9713	145.086	132.287	163.64	132.474	108.044	133.844	224.785	198.25	183.475	203.912	243.983	204.809	182.438	155.674	144.435	181.995	156.897	213.897	6054.73
evm.TU.Contig66.959	2149	2439	2329	2780	4193	3186	3027	2375	3291	2420	2324	2330	2654	2408	2055	3072	3183	3043	3309	2963	2028	2613	2329	2844	74.4983	77.182	73.6015	82.3011	105.186	114.288	85.3601	73.889	96.2878	75.5065	71.2782	68.6649	78.2747	75.8077	65.7473	94.3677	96.6238	91.7988	104.983	93.6743	63.7051	81.2427	71.6911	91.7425	2285.95
evm.TU.Contig66.765	3056	3860	4277	3885	2608	1651	4019	2716	3187	4111	3593	3039	1068	1056	1053	1402	2610	3874	2326	2273	1493	2324	2363	1458	143.2	165.109	182.698	155.464	88.4339	80.0535	153.193	114.215	126.039	173.378	148.956	121.057	42.5766	44.9365	45.5379	58.2142	107.094	157.97	99.7497	97.133	63.3935	97.6697	98.3191	63.5736	1024.52
evm.TU.Contig251.43	17	7	3	5	8	6	18	12	19	7	11	6	5	6	10	8	15	9	12	9	10	8	3	9	0.83554	0.314059	0.134415	0.209865	0.284532	0.305151	0.719653	0.529305	0.788144	0.309653	0.478323	0.250691	0.209073	0.267803	0.453601	0.348418	0.645575	0.384934	0.539775	0.403403	0.445363	0.352649	0.130926	0.411615	6.85382
evm.TU.Contig101.17	449	575	643	214	543	65	723	438	853	439	349	716	970	389	1113	516	683	694	667	776	418	809	1160	1115	14.5255	16.9804	18.9629	5.91222	12.7118	2.17593	19.0264	12.7165	23.29	12.7823	9.98901	19.691	26.6974	11.4283	33.2306	14.792	19.3484	19.5376	19.7481	22.8943	12.2535	23.4731	33.3219	33.5654	799.212
evm.TU.Contig964.2	283	337	473	101	203	24	340	300	502	282	203	308	568	192	529	204	211	223	357	341	210	306	479	477	9.00169	9.78503	13.7153	2.74353	4.67257	0.789939	8.79729	8.56377	13.4764	8.0732	5.71274	8.32832	15.3708	5.54607	15.5292	5.7499	5.87702	6.17259	10.3925	9.89169	6.05276	8.72959	13.5288	14.1184	414.885
evm.TU.Contig964.3	4	3	29	0	5	0	17	1	8	4	20	13	7	4	3	7	13	2	4	28	3	2	3	2	0.136737	0.0936143	0.903715	0	0.123685	0	0.472724	0.0306784	0.230808	0.123068	0.604877	0.37778	0.20358	0.124175	0.0946464	0.212039	0.389141	0.0594951	0.125141	0.872897	0.0929274	0.0613185	0.0910612	0.0636191	4.45013
evm.TU.Contig699.53_evm.TU.Contig699.54	1076	1936	1629	450	926	585	631	783	1330	1204	758	1553	1047	335	1155	620	1122	548	537	701	587	817	1000	839	30.5235	50.1327	42.1259	10.9015	19.0088	17.1721	14.5607	19.9338	31.8425	30.7402	19.024	37.4509	25.2685	8.63005	30.2385	15.585	27.871	13.5278	13.9415	18.135	15.0888	20.7864	25.1888	22.147	819.527
evm.TU.Contig341.493	14	10	7	18	11	14	14	22	12	17	4	13	22	82	20	18	25	19	11	16	57	19	17	36	0.416932	0.271851	0.190039	0.457783	0.237056	0.431429	0.339154	0.587984	0.301614	0.455664	0.105392	0.329116	0.557404	2.21767	0.549696	0.475009	0.65195	0.492397	0.299808	0.434546	1.53818	0.507487	0.449543	0.997631	40.0089
evm.TU.Contig101.66	804	948	1490	742	920	555	1822	1906	1864	1559	1384	1497	192	161	276	1164	1930	1730	688	834	1168	1446	937	1478	23.3874	25.1727	39.5112	18.4324	19.3659	16.7057	43.1129	49.7572	45.7621	40.8161	35.6183	37.0184	4.75159	4.25304	7.40955	30.0035	49.1611	43.7923	18.3159	22.1244	30.7869	37.7251	24.202	40.0066	204.2
evm.TU.Contig101.67	110	100	108	159	198	122	185	206	167	160	123	157	122	76	171	169	153	129	192	180	183	132	180	114	3.24098	2.68954	2.90078	4.00066	4.22154	3.71953	4.43392	5.447	4.15273	4.2429	3.20627	3.93235	3.05812	2.0335	4.64982	4.41227	3.94741	3.30749	5.17724	4.83654	4.88575	3.48813	4.70914	3.1255	119.768
evm.TU.Contig66.653	2	2	0	0	0	0	1	1	0	1	0	0	4	0	3	1	0	0	2	0	0	0	1	0	0.0736014	0.0671863	0	0	0	0	0.0299357	0.0330265	0	0.0331219	0	0	0.125235	0	0.10189	0.0326098	0	0	0.0673596	0	0	0	0.032677	0	2.23913
evm.TU.Contig66.1067	0	2	3	13	7	44	9	32	8	4	19	6	3	0	6	6	32	14	54	41	10	22	4	12	0	0.0579602	0.0868228	0.352452	0.160815	1.44545	0.232424	0.911721	0.214353	0.114294	0.533667	0.161929	0.0810285	0	0.175798	0.168791	0.889596	0.386775	1.56896	1.18705	0.287675	0.626417	0.112759	0.354501	2.94847
evm.TU.Contig54.258	434	411	1117	259	187	144	411	957	271	190	119	155	19	38	62	194	211	310	209	246	218	152	45	104	13.2887	11.4876	31.1783	6.77242	4.1434	4.56247	10.2369	26.2973	7.00319	5.23607	3.22367	4.03454	0.494945	1.05663	1.75203	5.26365	5.65735	8.26	5.85669	6.86921	6.04847	4.17418	1.22346	2.96317	39.0808
evm.TU.Contig477.706	24	14	18	2	14	42	1	3	0	2	0	4	2	0	14	3	12	51	0	0	3	3	4	2	0.785227	0.418125	0.536863	0.0558811	0.331462	1.42193	0.0266144	0.0880869	0	0.0588943	0	0.111253	0.0556704	0	0.422735	0.0869756	0.343797	1.45204	0	0	0.0889409	0.0880319	0.116206	0.0608898	5.34999
evm.TU.Contig421.495	307	106	109	148	334	307	921	319	418	617	280	131	14	3	23	55	51	223	42	41	80	217	111	46	11.279	3.55496	3.65063	4.64351	8.8798	11.6712	27.5249	10.518	12.9612	20.4023	9.10129	4.09142	0.437596	0.100093	0.779863	1.79056	1.64075	7.12958	1.4122	1.37372	2.6633	7.15037	3.62112	1.57262	13.0372
evm.TU.Contig341.542	107	57	90	16	76	5	104	136	46	41	52	9	13	6	7	27	31	28	27	46	12	19	7	8	3.75046	1.82377	2.87575	0.47893	1.92769	0.181349	2.96529	4.27806	1.3608	1.29343	1.61256	0.268172	0.387664	0.190985	0.226441	0.838605	0.951481	0.854052	0.866121	1.47041	0.381135	0.597296	0.217864	0.260929	8.28617
evm.TU.Contig180.146	112	99	102	105	156	247	94	77	84	178	124	182	128	43	124	105	187	159	15	98	39	74	120	43	3.27663	2.64386	2.72029	2.62331	3.3026	7.4774	2.23702	2.02165	2.07406	4.68692	3.20953	4.52636	3.18588	1.14242	3.34801	2.72201	4.79058	4.04791	0.401618	2.61465	1.03388	1.94167	3.11728	1.1706	95.0294
evm.TU.Contig188.103	70	70	50	42	36	34	74	38	49	178	57	110	56	19	93	13	66	64	10	20	29	35	72	8	1.95728	1.78668	1.27447	1.00289	0.728415	0.983734	1.68313	0.953551	1.15634	4.47954	1.41007	2.61466	1.33215	0.482452	2.3999	0.322099	1.61598	1.55725	0.255898	0.509991	0.734765	0.877722	1.78761	0.208149	54.7503
evm.TU.Contig425.14	0	0	0	0	0	0	0	0	0	0	0	0	0	0	0	0	0	0	0	0	0	0	0	0	0	0	0	0	0	0	0	0	0	0	0	0	0	0	0	0	0	0	0	0	0	0	0	0	NA
evm.TU.Contig480.350	411	391	566	136	258	74	178	155	153	452	217	100	43	131	404	120	156	256	758	161	186	93	103	93	11.945	10.3733	14.9958	3.37548	5.4261	2.22547	4.20822	4.04282	3.75293	11.8234	5.57977	2.47067	1.06322	3.45751	10.8364	3.09043	3.97016	6.47457	20.1618	4.26727	4.89841	2.42417	2.65809	2.51513	192.234
evm.TU.Contig383.286	253	217	189	141	992	37	278	455	107	439	303	142	147	62	91	76	136	218	314	203	264	379	268	84	7.34017	5.74698	4.99867	3.49346	20.8267	1.11079	6.5609	11.8469	2.62001	11.4633	7.77749	3.50222	3.62839	1.63352	2.4366	1.95385	3.45511	5.50386	8.33736	5.37107	6.94042	9.86188	6.90409	2.26775	95.8166
evm.TU.Contig251.43	17	7	3	5	8	6	18	12	19	7	11	6	5	6	10	8	15	9	12	9	10	8	3	9	0.83554	0.314059	0.134415	0.209865	0.284532	0.305151	0.719653	0.529305	0.788144	0.309653	0.478323	0.250691	0.209073	0.267803	0.453601	0.348418	0.645575	0.384934	0.539775	0.403403	0.445363	0.352649	0.130926	0.411615	6.85382
evm.TU.Contig101.17	449	575	643	214	543	65	723	438	853	439	349	716	970	389	1113	516	683	694	667	776	418	809	1160	1115	14.5255	16.9804	18.9629	5.91222	12.7118	2.17593	19.0264	12.7165	23.29	12.7823	9.98901	19.691	26.6974	11.4283	33.2306	14.792	19.3484	19.5376	19.7481	22.8943	12.2535	23.4731	33.3219	33.5654	799.212
evm.TU.Contig964.2	283	337	473	101	203	24	340	300	502	282	203	308	568	192	529	204	211	223	357	341	210	306	479	477	9.00169	9.78503	13.7153	2.74353	4.67257	0.789939	8.79729	8.56377	13.4764	8.0732	5.71274	8.32832	15.3708	5.54607	15.5292	5.7499	5.87702	6.17259	10.3925	9.89169	6.05276	8.72959	13.5288	14.1184	414.885
evm.TU.Contig964.3	4	3	29	0	5	0	17	1	8	4	20	13	7	4	3	7	13	2	4	28	3	2	3	2	0.136737	0.0936143	0.903715	0	0.123685	0	0.472724	0.0306784	0.230808	0.123068	0.604877	0.37778	0.20358	0.124175	0.0946464	0.212039	0.389141	0.0594951	0.125141	0.872897	0.0929274	0.0613185	0.0910612	0.0636191	4.45013
evm.TU.Contig699.53_evm.TU.Contig699.54	1076	1936	1629	450	926	585	631	783	1330	1204	758	1553	1047	335	1155	620	1122	548	537	701	587	817	1000	839	30.5235	50.1327	42.1259	10.9015	19.0088	17.1721	14.5607	19.9338	31.8425	30.7402	19.024	37.4509	25.2685	8.63005	30.2385	15.585	27.871	13.5278	13.9415	18.135	15.0888	20.7864	25.1888	22.147	819.527
evm.TU.Contig341.493	14	10	7	18	11	14	14	22	12	17	4	13	22	82	20	18	25	19	11	16	57	19	17	36	0.416932	0.271851	0.190039	0.457783	0.237056	0.431429	0.339154	0.587984	0.301614	0.455664	0.105392	0.329116	0.557404	2.21767	0.549696	0.475009	0.65195	0.492397	0.299808	0.434546	1.53818	0.507487	0.449543	0.997631	40.0089
evm.TU.Contig101.66	804	948	1490	742	920	555	1822	1906	1864	1559	1384	1497	192	161	276	1164	1930	1730	688	834	1168	1446	937	1478	23.3874	25.1727	39.5112	18.4324	19.3659	16.7057	43.1129	49.7572	45.7621	40.8161	35.6183	37.0184	4.75159	4.25304	7.40955	30.0035	49.1611	43.7923	18.3159	22.1244	30.7869	37.7251	24.202	40.0066	204.2
evm.TU.Contig101.67	110	100	108	159	198	122	185	206	167	160	123	157	122	76	171	169	153	129	192	180	183	132	180	114	3.24098	2.68954	2.90078	4.00066	4.22154	3.71953	4.43392	5.447	4.15273	4.2429	3.20627	3.93235	3.05812	2.0335	4.64982	4.41227	3.94741	3.30749	5.17724	4.83654	4.88575	3.48813	4.70914	3.1255	119.768
evm.TU.Contig66.653	2	2	0	0	0	0	1	1	0	1	0	0	4	0	3	1	0	0	2	0	0	0	1	0	0.0736014	0.0671863	0	0	0	0	0.0299357	0.0330265	0	0.0331219	0	0	0.125235	0	0.10189	0.0326098	0	0	0.0673596	0	0	0	0.032677	0	2.23913
evm.TU.Contig66.1067	0	2	3	13	7	44	9	32	8	4	19	6	3	0	6	6	32	14	54	41	10	22	4	12	0	0.0579602	0.0868228	0.352452	0.160815	1.44545	0.232424	0.911721	0.214353	0.114294	0.533667	0.161929	0.0810285	0	0.175798	0.168791	0.889596	0.386775	1.56896	1.18705	0.287675	0.626417	0.112759	0.354501	2.94847
evm.TU.Contig54.258	434	411	1117	259	187	144	411	957	271	190	119	155	19	38	62	194	211	310	209	246	218	152	45	104	13.2887	11.4876	31.1783	6.77242	4.1434	4.56247	10.2369	26.2973	7.00319	5.23607	3.22367	4.03454	0.494945	1.05663	1.75203	5.26365	5.65735	8.26	5.85669	6.86921	6.04847	4.17418	1.22346	2.96317	39.0808
evm.TU.Contig477.706	24	14	18	2	14	42	1	3	0	2	0	4	2	0	14	3	12	51	0	0	3	3	4	2	0.785227	0.418125	0.536863	0.0558811	0.331462	1.42193	0.0266144	0.0880869	0	0.0588943	0	0.111253	0.0556704	0	0.422735	0.0869756	0.343797	1.45204	0	0	0.0889409	0.0880319	0.116206	0.0608898	5.34999
evm.TU.Contig421.495	307	106	109	148	334	307	921	319	418	617	280	131	14	3	23	55	51	223	42	41	80	217	111	46	11.279	3.55496	3.65063	4.64351	8.8798	11.6712	27.5249	10.518	12.9612	20.4023	9.10129	4.09142	0.437596	0.100093	0.779863	1.79056	1.64075	7.12958	1.4122	1.37372	2.6633	7.15037	3.62112	1.57262	13.0372
evm.TU.Contig341.542	107	57	90	16	76	5	104	136	46	41	52	9	13	6	7	27	31	28	27	46	12	19	7	8	3.75046	1.82377	2.87575	0.47893	1.92769	0.181349	2.96529	4.27806	1.3608	1.29343	1.61256	0.268172	0.387664	0.190985	0.226441	0.838605	0.951481	0.854052	0.866121	1.47041	0.381135	0.597296	0.217864	0.260929	8.28617
evm.TU.Contig180.146	112	99	102	105	156	247	94	77	84	178	124	182	128	43	124	105	187	159	15	98	39	74	120	43	3.27663	2.64386	2.72029	2.62331	3.3026	7.4774	2.23702	2.02165	2.07406	4.68692	3.20953	4.52636	3.18588	1.14242	3.34801	2.72201	4.79058	4.04791	0.401618	2.61465	1.03388	1.94167	3.11728	1.1706	95.0294
evm.TU.Contig188.103	70	70	50	42	36	34	74	38	49	178	57	110	56	19	93	13	66	64	10	20	29	35	72	8	1.95728	1.78668	1.27447	1.00289	0.728415	0.983734	1.68313	0.953551	1.15634	4.47954	1.41007	2.61466	1.33215	0.482452	2.3999	0.322099	1.61598	1.55725	0.255898	0.509991	0.734765	0.877722	1.78761	0.208149	54.7503
evm.TU.Contig425.14	0	0	0	0	0	0	0	0	0	0	0	0	0	0	0	0	0	0	0	0	0	0	0	0	0	0	0	0	0	0	0	0	0	0	0	0	0	0	0	0	0	0	0	0	0	0	0	0	NA
evm.TU.Contig480.350	411	391	566	136	258	74	178	155	153	452	217	100	43	131	404	120	156	256	758	161	186	93	103	93	11.945	10.3733	14.9958	3.37548	5.4261	2.22547	4.20822	4.04282	3.75293	11.8234	5.57977	2.47067	1.06322	3.45751	10.8364	3.09043	3.97016	6.47457	20.1618	4.26727	4.89841	2.42417	2.65809	2.51513	192.234
evm.TU.Contig383.286	253	217	189	141	992	37	278	455	107	439	303	142	147	62	91	76	136	218	314	203	264	379	268	84	7.34017	5.74698	4.99867	3.49346	20.8267	1.11079	6.5609	11.8469	2.62001	11.4633	7.77749	3.50222	3.62839	1.63352	2.4366	1.95385	3.45511	5.50386	8.33736	5.37107	6.94042	9.86188	6.90409	2.26775	95.8166
evm.TU.Contig54.483	66	88	77	22	72	11	90	80	95	81	65	60	25	11	14	40	92	87	27	33	23	46	54	30	5.24456	6.38326	5.5778	1.49293	4.14019	0.904488	5.81756	5.70508	6.37122	5.79308	4.56972	4.05308	1.69011	0.793789	1.02671	2.81655	6.40163	6.01603	1.96355	2.39143	1.65611	3.27837	3.81017	2.21829	15.9431
evm.TU.Contig210.3	0	0	0	0	0	0	0	0	0	0	0	0	0	0	0	0	0	0	0	0	0	0	0	0	0	0	0	0	0	0	0	0	0	0	0	0	0	0	0	0	0	0	0	0	0	0	0	0	NA
evm.TU.Contig14.217	19	39	41	16	49	3	47	41	72	98	19	93	51	10	42	73	91	52	130	52	72	144	130	103	1.45744	2.73083	2.86699	1.04811	2.71991	0.238123	2.93269	2.82245	4.66124	6.76583	1.28944	6.0644	3.32826	0.696598	2.97332	4.96193	6.11244	3.47108	9.12625	3.63762	5.00455	9.9068	8.85452	7.35197	33.0508
evm.TU.Contig555.171	0	2	0	0	3	0	5	2	0	0	0	3	0	0	1	3	4	3	6	5	2	0	0	0	0	0.242274	0	0	0.288088	0	0.53974	0.238187	0	0	0	0.338433	0	0	0.122472	0.352773	0.464814	0.34644	0.728696	0.605105	0.240496	0	0	0	0.338434
evm.TU.Contig16.176	0	0	0	0	0	0	0	0	0	0	0	0	0	0	0	0	0	0	0	0	0	0	0	0	0	0	0	0	0	0	0	0	0	0	0	0	0	0	0	0	0	0	0	0	0	0	0	0	NA
evm.TU.Contig14.215	11	24	15	6	21	11	17	27	49	9	8	20	25	14	33	51	33	15	60	57	38	27	37	42	0.744764	1.48331	0.925815	0.346919	1.02889	0.770661	0.936283	1.64057	2.79998	0.548438	0.479211	1.15113	1.44005	0.860797	2.06203	3.05977	1.95649	0.883776	3.71784	3.51949	2.33134	1.63955	2.2244	2.6461	23.3432
evm.TU.Contig555.173	13	30	16	13	37	3	40	33	27	34	13	21	27	9	6	26	24	22	34	28	30	35	20	16	0.803888	1.69343	0.901943	0.686509	1.65568	0.191963	2.01208	1.83135	1.40913	1.8923	0.711224	1.10393	1.42045	0.505407	0.34242	1.42468	1.29957	1.18386	1.92417	1.57902	1.68101	1.94113	1.09817	0.920668	13.201
evm.TU.Contig477.437	4	19	7	11	3	3	4	3	15	13	9	4	7	4	9	9	5	11	12	4	4	4	9	12	1.14895	4.98182	1.83293	2.69826	0.623568	0.891674	0.934614	0.773335	3.63634	3.3608	2.28714	0.976717	1.7106	1.04339	2.38583	2.29073	1.25761	2.74953	3.15453	1.0478	1.04111	1.03047	2.29545	3.20739	6.48073
evm.TU.Contig180.139	0	0	0	0	0	0	0	1	0	0	0	0	0	1	0	0	0	0	0	0	0	0	0	0	0	0	0	0	0	0	0	0.208936	0	0	0	0	0	0.211424	0	0	0	0	0	0	0	0	0	0	NA
evm.TU.Contig207.43	0	0	0	1	0	0	0	0	3	0	0	1	2	0	1	0	0	1	1	0	2	0	0	0	0	0	0	0.0754506	0	0	0	0	0.2237	0	0	0.0751071	0.150332	0	0.0815395	0	0	0.0768842	0.0808584	0	0.160117	0	0	0	0.950347
evm.TU.Contig906.96	0	0	0	0	0	0	0	0	0	0	0	0	0	0	0	0	0	0	0	0	0	0	0	0	0	0	0	0	0	0	0	0	0	0	0	0	0	0	0	0	0	0	0	0	0	0	0	0	NA
evm.TU.Contig180.608	9	44	30	31	54	33	20	11	52	22	14	38	17	10	43	56	14	64	34	84	125	20	14	40	0.595379	2.65704	1.80917	1.75131	2.58504	2.25897	1.07625	0.653055	2.90327	1.30988	0.819388	2.137	0.956777	0.600755	2.62528	3.2827	0.810992	3.68431	2.05846	5.06768	7.49303	1.18663	0.822365	2.46231	22.9868
evm.TU.Contig766.90	0	0	0	0	0	0	0	0	0	0	0	0	1	0	0	0	0	0	0	0	0	0	0	0	0	0	0	0	0	0	0	0	0	0	0	0	0.180929	0	0	0	0	0	0	0	0	0	0	0	NA
evm.TU.Contig81.389	0	0	0	0	0	0	0	0	0	0	0	0	0	0	0	0	0	0	0	0	0	0	0	0	0	0	0	0	0	0	0	0	0	0	0	0	0	0	0	0	0	0	0	0	0	0	0	0	NA
evm.TU.Contig63.478	0	1	0	0	1	0	2	1	0	0	0	2	3	0	7	0	0	2	0	0	2	0	4	5	0	0.154118	0	0	0.122175	0	0.274677	0.151519	0	0	0	0.287051	0.430915	0	1.09072	0	0	0.293842	0	0	0.305975	0	0.59966	0.785525	3.28691
evm.TU.Contig96.703	302	391	349	899	507	1035	522	297	513	457	477	735	585	419	1070	689	736	697	503	411	545	697	867	665	16.4517	19.4436	17.3315	41.823	19.9864	58.3431	23.1317	14.52	23.5861	22.4068	22.9897	34.0378	27.1126	20.7284	53.7953	33.2595	35.1091	33.0417	25.0776	20.4186	26.9028	34.0543	41.9382	33.7099	676.565
evm.TU.Contig63.460	35	32	0	18	5	23	8	7	17	12	1	19	9	2	19	13	38	12	7	16	8	21	8	8	2.04249	1.70465	0	0.897046	0.211146	1.38888	0.379764	0.366603	0.837286	0.630277	0.05163	0.942571	0.446832	0.105991	1.0233	0.672244	1.94184	0.609393	0.373855	0.851511	0.423036	1.09912	0.414541	0.434423	9.83042
evm.TU.Contig471.318	316	334	344	343	464	317	291	170	245	333	252	251	212	234	308	318	289	268	320	203	179	304	294	252	17.9206	17.2905	17.7841	16.6116	19.0417	18.6024	13.4243	8.6521	11.7264	16.9969	12.6438	12.1007	10.2285	12.0512	16.1203	15.9803	14.3516	13.2259	16.6085	10.4988	9.19847	15.4623	14.8047	13.2983	244.749
evm.TU.Contig154.199	0	4	4	11	4	8	1	4	4	2	4	4	3	8	2	6	6	8	3	8	1	0	5	2	0	0.545662	0.544924	1.40382	0.432565	1.2371	0.121563	0.536457	0.504502	0.269004	0.528859	0.508157	0.381418	1.08569	0.275839	0.794534	0.785159	1.04036	0.410302	1.09028	0.135415	0	0.663475	0.278118	4.181
evm.TU.Contig583.12	1	0	0	0	1	2	3	0	0	1	0	0	0	0	2	0	4	5	0	0	4	0	0	0	0.0537696	0	0	0	0.0389098	0.111279	0.131217	0	0	0.0483945	0	0	0	0	0.0992483	0	0.188336	0.233955	0	0	0.194892	0	0	0	0.676869
evm.TU.Contig766.107	2	5	2	2	5	2	5	2	1	0	2	3	3	13	5	0	5	0	6	5	2	8	5	3	0.330108	0.753339	0.300928	0.281908	0.597198	0.341586	0.671318	0.296253	0.139303	0	0.292056	0.420936	0.421267	1.94857	0.761644	0	0.722659	0	0.906338	0.752618	0.299125	1.18427	0.732793	0.460763	6.81271
evm.TU.Contig480.49	108	94	50	62	198	130	65	79	53	46	85	62	98	125	32	99	38	73	24	106	106	67	44	36	7.61528	6.05041	3.21395	3.7334	10.103	9.48528	3.72828	4.99914	3.15407	2.9193	5.30264	3.7164	5.87894	8.00422	2.08242	6.18571	2.3463	4.4793	1.54877	6.81627	6.77274	4.23713	2.75487	2.36209	81.2239
evm.TU.Contig333.38	69	81	41	45	100	37	33	36	31	62	61	39	25	38	33	55	50	92	14	64	45	13	35	18	4.55549	4.88164	2.46761	2.53717	4.77758	2.52774	1.77228	2.13302	1.72735	3.68414	3.56309	2.18887	1.40422	2.27833	2.01074	3.21767	2.89063	5.28565	0.845916	3.8534	2.69212	0.769776	2.05182	1.10583	31.102
evm.TU.Contig600.185	0	0	0	0	2	0	0	0	0	0	1	1	1	4	0	0	0	2	2	0	0	0	1	1	0	0	0	0	0.0704544	0	0	0	0	0	0.0430692	0.0413833	0.0414159	0.176833	0	0	0	0.0847249	0.0891044	0	0	0	0.0432257	0.0452988	1.59909
evm.TU.Contig16.438	3	8	8	3	29	1	5	7	2	7	8	2	19	24	3	8	4	5	10	6	3	3	1	7	0.248508	0.604928	0.60411	0.212223	1.73836	0.0857164	0.336916	0.520384	0.139824	0.521887	0.5863	0.140838	1.33901	1.80542	0.229349	0.587221	0.290146	0.360425	0.758111	0.453262	0.225184	0.222882	0.0735538	0.539571	14.5873
evm.TU.Contig383.463	167	298	294	220	206	389	98	23	32	190	264	242	132	272	75	182	187	138	49	63	29	112	72	170	8.30639	13.5303	13.3306	9.34479	7.41456	20.0212	3.96511	1.02667	1.34332	8.50567	11.6175	10.2325	5.58574	12.286	3.44281	8.02158	8.1447	5.97311	2.23052	2.85769	1.30704	4.99631	3.17991	7.86821	153.702
evm.TU.Contig133.30	45	50	65	130	193	383	196	50	67	47	123	105	56	72	62	274	57	157	60	131	90	77	81	40	2.08362	2.11334	2.74363	5.14044	6.46674	18.3506	7.38235	2.0777	2.61827	1.95868	5.03874	4.13299	2.20599	3.02751	2.64944	11.2421	2.3111	6.32602	2.54255	5.53166	3.77611	3.19765	3.33025	1.72344	61.3928
evm.TU.Contig256.89	209	256	355	512	434	618	168	177	97	214	226	216	108	205	128	332	222	342	103	165	144	104	213	209	14.3705	16.0679	22.2515	30.0639	21.5942	43.9701	9.39651	10.9221	5.62898	13.2433	13.7481	12.6255	6.3177	12.8004	8.12252	20.2281	13.3664	20.4633	6.48149	10.3464	8.97188	6.41347	13.0044	13.3722	142.636
evm.TU.Contig797.202	617	621	711	1257	1711	864	979	485	517	476	712	622	690	758	339	999	533	821	393	598	462	344	334	378	36.9152	33.9161	38.779	64.2254	74.0786	53.4908	47.647	26.0416	26.1063	25.6322	37.6887	31.6359	35.1221	41.1847	18.7187	52.9637	27.9245	42.7453	21.5192	32.6287	25.0472	18.4592	17.744	21.0447	570.887
evm.TU.Contig360.64	0	0	0	0	0	0	0	0	0	0	0	0	0	0	0	0	0	0	0	0	0	0	0	0	0	0	0	0	0	0	0	0	0	0	0	0	0	0	0	0	0	0	0	0	0	0	0	0	NA
evm.TU.Contig694.191	0	0	1	0	0	0	0	1	0	0	0	0	0	0	0	0	0	0	0	1	0	0	0	0	0	0	0.113059	0	0	0	0	0.111302	0	0	0	0	0	0	0	0	0	0	0	0.113104	0	0	0	0	NA
evm.TU.Contig55.288	0	0	0	0	0	0	0	0	0	0	0	0	0	0	0	0	0	0	0	0	0	0	0	0	0	0	0	0	0	0	0	0	0	0	0	0	0	0	0	0	0	0	0	0	0	0	0	0	NA
evm.TU.Contig477.435	29	89	24	26	51	6	35	29	19	48	21	53	39	0	64	17	85	143	51	15	29	13	76	20	2.36098	6.61422	1.7812	1.80767	3.0046	0.505464	2.3179	2.11884	1.30551	3.51718	1.5126	3.66808	2.70128	0	4.80873	1.22641	6.05969	10.1311	3.79995	1.11369	2.13938	0.949232	5.49406	1.51515	33.5921
evm.TU.Contig45.508	68	85	64	74	126	27	43	26	65	29	91	76	47	21	28	38	66	109	36	79	36	24	31	45	13.7979	15.7441	11.8383	12.8229	18.5011	5.66908	7.0975	4.73461	11.1314	5.29616	16.3364	13.1095	8.11358	3.86964	5.24347	6.83251	11.727	19.2467	6.68529	14.6187	6.61916	4.36768	5.58536	8.49665	30.645
evm.TU.Contig54.484	628	825	638	363	649	223	807	506	681	834	522	940	308	27	261	516	783	1019	308	486	397	548	758	395	54.0452	64.8106	50.0524	26.6781	40.417	19.8585	56.4942	39.08	49.4627	64.5985	39.7447	68.7693	22.5506	2.11012	20.7298	39.3495	59.0061	76.3127	24.2584	38.1428	30.9588	42.2973	57.9232	31.6319	191.295
evm.TU.Contig54.489	27	42	32	66	100	97	56	47	166	51	24	66	34	2	212	190	94	167	202	94	116	221	290	145	2.4474	3.47524	2.64422	5.109	6.55939	9.09824	4.12916	3.82336	12.6994	4.16073	1.9247	5.08574	2.62199	0.164633	17.7351	15.2611	7.46115	13.1729	16.7574	7.77047	9.52785	17.9667	23.3413	12.2304	82.7972
evm.TU.Contig477.430	10	17	3	4	5	3	10	13	49	17	3	37	57	7	73	60	43	55	94	20	32	56	95	64	2.21172	3.43221	0.604866	0.755512	0.800245	0.686589	1.79913	2.58036	9.14661	3.38406	0.587033	6.95667	10.7255	1.40597	14.9008	11.7591	8.32792	10.5857	19.0271	4.03403	6.41323	11.1085	18.6569	13.1717	44.4082
evm.TU.Contig394.336	0	0	0	1	0	0	0	1	0	0	0	0	0	0	0	0	0	0	0	0	3	0	0	0	0	0	0	0.0620629	0	0	0	0.065221	0	0	0	0	0	0	0	0	0	0	0	0	0.19756	0	0	0	NA
evm.TU.Contig54.488	20	54	13	96	151	56	79	50	104	86	20	149	78	1	177	175	73	165	235	147	142	215	230	149	1.85859	4.58081	1.1013	7.61861	10.1544	5.38501	5.97191	4.16994	8.15682	7.19302	1.64435	11.7709	6.16679	0.0843918	15.1804	14.4107	5.94038	13.3433	19.9864	12.458	11.9574	17.9195	18.9787	12.8846	84.0907
evm.TU.Contig54.490	0	0	0	0	1	0	0	0	0	0	0	0	0	0	0	0	0	0	0	0	0	0	0	0	0	0	0	0	0.163315	0	0	0	0	0	0	0	0	0	0	0	0	0	0	0	0	0	0	0	NA
evm.TU.Contig54.491	23	38	27	237	174	101	115	62	47	55	43	152	65	16	161	192	118	141	91	151	101	103	126	88	3.74041	5.64118	4.00279	32.9148	20.4769	16.9964	15.2133	9.04877	6.45094	8.05033	6.18687	21.0138	8.99323	2.36297	24.1643	27.6685	16.8039	19.9543	13.544	22.3948	14.8836	15.0232	18.1948	13.317	79.5476
evm.TU.Contig477.432	35	48	18	22	25	2	32	9	49	48	21	59	66	18	103	54	23	57	77	48	44	49	75	38	4.09578	5.12749	1.92021	2.19858	2.11705	0.242183	3.04615	0.945187	4.83948	5.05556	2.1742	5.86935	6.57088	1.91288	11.124	5.59957	2.35686	5.80455	8.24656	5.12258	4.66571	5.1428	7.7932	4.13793	60.8709
evm.TU.Contig477.433	13	16	22	13	52	11	24	14	12	14	26	13	34	39	31	29	18	20	70	31	44	8	27	20	0.72485	0.814366	1.11824	0.619012	2.09812	0.634662	1.08855	0.70055	0.564703	0.702574	1.28259	0.616194	1.61285	1.97477	1.59523	1.43283	0.87885	0.970421	3.57204	1.57632	2.22307	0.400064	1.33676	1.03769	33.502
evm.TU.Contig477.431	0	0	0	0	1	2	0	0	0	1	1	1	3	2	7	2	3	2	4	0	2	1	5	2	0	0	0	0	0.061795	0.176728	0	0	0	0.0768581	0.0755513	0.0725939	0.217953	0.155098	0.551677	0.15134	0.224331	0.148623	0.312611	0	0.154759	0.0765889	0.379129	0.158925	3.93347
novel.1616	14	20	19	16	19	0	29	33	43	26	18	41	48	5	83	55	44	64	151	51	102	54	63	78	0.544185	0.709648	0.673254	0.531116	0.534434	0	0.916957	1.15117	1.41065	0.909601	0.619016	1.35479	1.58734	0.176496	2.97751	1.89441	1.49764	2.16483	5.37166	1.80787	3.59265	1.88255	2.17443	2.82127	44.3924
evm.TU.Contig54.487	55	58	31	6	35	5	15	14	60	59	13	73	54	0	122	100	55	89	100	34	49	71	144	69	4.07293	3.92072	2.09273	0.379443	1.87557	0.383141	0.903582	0.930418	3.74998	3.93237	0.851722	4.59553	3.40211	0	8.33796	6.562	3.56651	5.73534	6.77731	2.29616	3.28803	4.7156	9.46874	4.75471	57.8106
evm.TU.Contig477.429	0	0	0	0	0	0	0	0	0	0	0	0	0	0	0	0	0	0	0	0	0	0	0	0	0	0	0	0	0	0	0	0	0	0	0	0	0	0	0	0	0	0	0	0	0	0	0	0	NA
evm.TU.Contig477.428	0	0	0	0	0	0	0	0	0	0	0	0	0	0	0	0	0	0	0	0	0	0	0	0	0	0	0	0	0	0	0	0	0	0	0	0	0	0	0	0	0	0	0	0	0	0	0	0	NA
evm.TU.Contig477.427	127	93	82	176	107	40	96	48	110	129	53	202	164	42	256	234	171	195	254	159	166	227	328	203	14.7836	9.88222	8.70157	17.4961	9.01329	4.81817	9.09036	5.01447	10.807	13.5153	5.45838	19.9893	16.2417	4.4399	27.5026	24.1371	17.4305	19.7532	27.0598	16.8792	17.5098	23.6994	33.9029	21.9889	150.394
evm.TU.Contig54.486	21	38	23	3	24	2	35	13	45	35	15	71	26	3	56	79	107	100	71	28	59	91	100	87	2.47493	4.0881	2.47103	0.301937	2.04681	0.243904	3.3554	1.37497	4.476	3.71254	1.56403	7.1133	2.60692	0.321079	6.09099	8.25017	11.0424	10.2558	7.658	3.0094	6.30074	9.61878	10.4648	9.541	27.877
evm.TU.Contig188.99	0	0	0	0	0	0	0	0	0	0	0	0	0	0	0	0	0	0	0	0	0	0	0	0	0	0	0	0	0	0	0	0	0	0	0	0	0	0	0	0	0	0	0	0	0	0	0	0	NA
evm.TU.Contig154.345	0	1	3	6	18	1	6	4	0	2	2	1	1	5	0	6	4	0	0	1	0	0	0	0	0	0.0577943	0.173149	0.324409	0.82468	0.0655142	0.309011	0.227278	0	0.113967	0.112029	0.053822	0.0538643	0.28748	0	0.336616	0.221762	0	0	0.057739	0	0	0	0	1.92237
evm.TU.Contig117.16	3	1	6	0	24	0	1	4	5	0	9	0	4	0	0	2	2	1	0	0	1	2	0	0	0.190119	0.0578495	0.346628	0	1.10062	0	0.0515511	0.227495	0.267429	0	0.504613	0	0.215663	0	0	0.112312	0.110987	0.0551481	0	0	0.0574251	0.113676	0	0	1.22382
evm.TU.Contig117.12	0	0	0	0	0	0	0	0	0	0	4	0	0	0	0	0	0	0	0	0	0	0	0	0	0	0	0	0	0	0	0	0	0	0	0.287409	0	0	0	0	0	0	0	0	0	0	0	0	0	NA
evm.TU.Contig184.42	9	20	25	103	276	51	74	121	17	29	51	23	42	26	15	50	28	42	60	123	78	45	38	29	0.782654	1.58764	1.98187	7.64919	17.3684	4.58926	5.2347	9.4432	1.2477	2.26978	3.92381	1.70029	3.10733	2.05328	1.20386	3.85292	2.13217	3.17835	4.7752	9.75464	6.14636	3.50974	2.93425	2.34669	26.332
evm.TU.Contig154.257	149	186	230	391	466	311	269	231	171	198	252	134	139	130	173	182	145	252	127	341	187	180	238	147	8.68752	9.89959	12.2249	19.4687	19.6616	18.7635	12.7584	12.0873	8.41471	10.3904	12.9993	6.64176	6.89501	6.88335	9.30919	9.40315	7.40312	12.786	6.77683	18.1319	9.87979	9.41276	12.3217	7.9755	143.104
evm.TU.Contig477.207	1647	1793	2212	1783	3063	2124	1834	1826	2242	2013	2516	2219	1609	1116	1754	1489	1649	2150	1526	1475	1138	2151	2703	2295	87.425	86.8794	107.037	80.8247	117.655	116.665	79.1906	86.9859	100.441	96.1711	118.158	100.131	72.6622	53.7963	85.9266	70.0372	76.6478	99.3129	74.1327	71.4024	54.7369	102.404	127.401	113.359	1446.68
evm.TU.Contig477.207	1647	1793	2212	1783	3063	2124	1834	1826	2242	2013	2516	2219	1609	1116	1754	1489	1649	2150	1526	1475	1138	2151	2703	2295	87.425	86.8794	107.037	80.8247	117.655	116.665	79.1906	86.9859	100.441	96.1711	118.158	100.131	72.6622	53.7963	85.9266	70.0372	76.6478	99.3129	74.1327	71.4024	54.7369	102.404	127.401	113.359	1446.68
evm.TU.Contig5.277	0	0	0	0	0	0	0	0	0	0	0	0	0	0	0	0	0	0	0	1	0	0	0	0	0	0	0	0	0	0	0	0	0	0	0	0	0	0	0	0	0	0	0	0.0659156	0	0	0	0	NA
evm.TU.Contig54.6	7	12	7	0	6	0	8	7	11	18	7	12	9	1	6	0	5	6	1	0	2	8	21	2	0.823514	1.28869	0.75072	0	0.510795	0	0.765588	0.739056	1.09219	1.90592	0.728587	1.20012	0.900795	0.106836	0.651449	0	0.515086	0.614256	0.107668	0	0.213206	0.844107	2.1937	0.218944	5.10749
evm.TU.Contig462.238	97	49	59	348	355	16	1314	833	1021	272	50	127	40	63	69	84	61	164	353	353	698	66	28	13	4.05042	1.86775	2.24588	12.4096	10.727	0.691342	44.633	31.2161	35.9822	10.2225	1.84718	4.50817	1.42102	2.389	2.65909	3.10813	2.23046	5.95932	13.4901	13.4425	26.4107	2.47176	1.03818	0.505129	55.957
evm.TU.Contig84.258	78	52	23	141	131	6	271	249	300	70	27	80	43	8	77	68	54	107	147	140	287	22	34	21	3.55455	2.16316	0.955488	5.48732	4.32	0.282935	10.046	10.1835	11.5384	2.8711	1.08859	3.0992	1.66713	0.331076	3.23845	2.74594	2.15487	4.24326	6.13086	5.81832	11.8514	0.899183	1.3758	0.890514	41.8018
evm.TU.Contig63.142	195	239	202	232	167	127	254	130	215	204	67	120	132	311	160	123	121	183	126	115	170	79	47	51	13.4637	15.0633	12.7141	13.6794	8.34387	9.07354	14.2658	8.05523	12.5285	12.677	4.09274	7.04334	7.75377	19.5	10.1954	7.52534	7.31562	10.9952	7.96182	7.24111	10.6359	4.89205	2.88146	3.27665	195.077
evm.TU.Contig96.283	26	46	20	197	142	23	297	184	249	37	27	67	23	14	28	49	44	119	167	181	235	34	2	2	1.04491	1.68755	0.732726	6.76117	4.12967	0.956483	9.70943	6.63635	8.44574	1.33834	0.960018	2.28902	0.7864	0.510951	1.03853	1.74499	1.54844	4.16176	6.14235	6.6338	8.55794	1.22552	0.0713708	0.0747938	21.0391
evm.TU.Contig300.35	0	4	5	0	1	3	57	17	41	17	2	4	0	2	3	0	6	5	0	1	5	3	1	2	0	0.373879	0.466717	0	0.0740968	0.317865	4.74771	1.56218	3.54319	1.5667	0.181183	0.348182	0	0.185975	0.283501	0	0.537979	0.445525	0	0.0933804	0.46392	0.275507	0.0909207	0.190563	1.66187
evm.TU.Contig300.33	0	0	0	0	0	0	0	0	0	0	0	0	0	0	0	0	0	0	0	0	0	0	0	0	0	0	0	0	0	0	0	0	0	0	0	0	0	0	0	0	0	0	0	0	0	0	0	0	NA
evm.TU.Contig184.714	397	447	361	289	348	156	392	413	471	360	193	290	210	150	259	348	381	476	407	378	496	307	263	281	31.8906	32.7774	26.4354	19.8253	20.229	12.9671	25.6148	29.7734	31.932	26.0276	13.7164	19.8034	14.3517	10.9423	19.2012	24.771	26.8	33.2739	29.9212	27.6912	36.1035	22.118	18.7592	21.0043	200.398
evm.TU.Contig969.9	735	1080	782	327	793	150	685	596	957	544	622	639	192	82	78	382	326	541	540	448	548	327	163	208	40.0727	53.7501	38.8665	15.2251	31.2865	8.46247	30.3798	29.1618	44.0359	26.6943	30.0029	29.6163	8.90581	4.05996	3.92475	18.4551	15.5638	25.6675	26.9444	22.275	27.0731	15.9898	7.89105	10.5525	111.651
evm.TU.Contig294.91	507	489	555	444	1105	346	682	441	677	443	702	539	610	489	452	552	417	492	695	673	563	525	520	490	35.2254	31.0136	35.1519	26.344	55.5563	24.8754	38.5448	27.4975	39.6982	27.702	43.1516	31.8351	36.057	30.8535	28.983	33.9844	25.3701	29.7467	44.1923	42.6425	35.4449	32.7147	32.0802	31.6793	497.691
evm.TU.Contig471.242	174	211	143	281	268	233	317	187	288	186	260	281	331	285	258	314	199	185	294	319	277	218	309	223	9.4944	10.5098	7.11314	13.0941	10.5822	13.1559	14.0705	9.15728	13.2631	9.13462	12.5517	13.0345	15.3659	14.1224	12.9925	15.1824	9.50843	8.78446	14.6818	15.874	13.696	10.6687	14.9714	11.3228	280.723
evm.TU.Contig264.248	665	655	635	604	1065	705	840	563	1135	594	769	761	809	716	849	790	530	640	944	931	933	798	949	889	37.6163	33.8213	32.7442	29.1771	43.5939	41.2656	38.6514	28.5804	54.1855	30.2412	38.485	36.5938	38.9326	36.7802	44.3218	39.598	26.2523	31.5035	48.8696	48.0266	47.8225	40.4848	47.6657	46.7936	766.32
evm.TU.Contig96.630	129	144	172	103	186	62	171	171	162	165	183	156	90	109	70	93	97	90	117	83	80	73	88	147	7.39151	7.53183	8.98419	5.04001	7.71221	3.67604	7.97025	8.79318	7.83415	8.50915	9.27695	7.59866	4.38729	5.67174	3.70167	4.72192	4.8669	4.48757	6.13539	4.33711	4.15365	3.75147	4.47725	7.83775	86.4643
evm.TU.Contig471.250	65	96	159	49	45	353	57	59	60	22	121	52	54	246	133	218	83	99	91	70	91	30	127	75	1.52614	2.05753	3.40317	0.982487	0.764565	8.57628	1.08865	1.24319	1.18895	0.464902	2.51348	1.03789	1.07866	5.24519	2.88196	4.53554	1.70646	2.02274	1.95539	1.49884	1.93605	0.631736	2.6477	1.6386	141.061
evm.TU.Contig264.252	0	0	0	0	0	0	0	0	0	0	0	0	0	0	0	0	0	0	0	0	0	0	0	0	0	0	0	0	0	0	0	0	0	0	0	0	0	0	0	0	0	0	0	0	0	0	0	0	NA
evm.TU.Contig600.278	681	734	872	784	842	1071	363	232	310	614	911	805	1583	2833	1735	928	592	689	480	323	381	821	1373	1337	12.8077	12.6013	14.9502	12.5919	11.4593	20.8429	5.55345	3.91577	4.92061	10.3932	15.1584	12.8703	25.3288	48.3857	30.1147	15.4655	9.7495	11.2763	8.26186	5.53993	6.49299	13.8485	22.9287	23.3984	1987.37
evm.TU.Contig8.18	42	65	33	31	51	43	60	29	66	28	51	54	49	54	35	96	59	54	46	30	30	63	66	37	3.06575	4.33108	2.19588	1.93242	2.69389	3.24789	3.56264	1.89973	4.06598	1.83952	3.29359	3.35082	3.04295	3.57955	2.35783	6.20943	3.77118	3.4301	3.07298	1.99705	1.98429	4.12443	4.27777	2.51316	44.2943
evm.TU.Contig967.155	805	1114	997	661	1025	728	696	688	686	888	1247	794	1313	1239	1198	719	739	782	790	577	718	934	1061	1062	20.05	25.3278	22.637	14.0595	18.4741	18.7626	14.1013	15.3784	14.4203	19.9063	27.4786	16.8115	27.8223	28.0244	27.5379	15.8686	16.1176	16.9492	18.0077	13.1061	16.2046	20.8641	23.4649	24.6135	1207.71
evm.TU.Contig16.525	1723	1494	1917	278	1759	646	445	258	646	899	1838	1097	2166	2335	1312	1103	1129	1174	677	400	307	1073	1329	1775	46.9117	37.1314	47.5801	6.46386	34.6565	18.2001	9.85573	6.30409	14.8444	22.03	44.2744	25.3905	50.1725	57.7338	32.9675	26.6112	26.9171	27.8157	16.8693	9.93196	7.5741	26.2018	32.1297	44.9703	1861.59
evm.TU.Contig55.131	0	0	0	0	0	0	0	0	0	0	0	0	0	0	0	0	0	0	0	0	0	0	0	0	0	0	0	0	0	0	0	0	0	0	0	0	0	0	0	0	0	0	0	0	0	0	0	0	NA
evm.TU.Contig55.128	877	1044	952	824	1230	1191	830	755	760	821	1493	1090	1650	1808	1528	905	962	823	1133	728	967	1008	1323	1657	19.3452	21.0218	19.1433	15.5222	19.6337	27.1851	14.8931	14.9461	14.1489	16.2996	29.137	20.4395	30.9648	36.2176	31.1067	17.6895	18.5817	15.7979	22.8727	14.6448	19.3284	19.942	25.9131	34.0116	1606.45
evm.TU.Contig5.235	1546	1586	1564	995	1783	1097	1211	1105	1299	1253	1600	1345	2024	1701	1518	1117	1176	1082	1080	955	1044	1144	1257	1187	40.9336	38.3326	37.7498	22.498	34.1621	30.0554	26.0824	26.2567	29.0278	29.8594	37.4802	30.2735	45.5924	40.8999	37.0936	26.2069	27.2656	24.9301	26.1703	23.0597	25.0477	27.1664	29.5523	29.2451	1682.9
evm.TU.Contig437.176	576	453	503	229	348	345	392	309	373	368	398	351	508	474	425	380	355	231	321	216	309	450	391	362	12.3286	8.85081	9.81443	4.18578	5.39004	7.64107	6.8251	5.93547	6.73803	7.0892	7.53675	6.38655	9.25049	9.2133	8.39528	7.20719	6.65359	4.30256	6.28794	4.21621	5.99301	8.63849	7.43109	7.20991	452.496
evm.TU.Contig296.245	524	585	631	595	655	2144	328	81	235	511	1257	811	531	1288	482	855	477	559	93	258	145	590	915	966	29.3403	29.9009	32.2085	28.4513	26.5398	124.223	14.9396	4.07029	11.1054	25.7521	62.2701	38.6032	25.2952	65.4932	24.9079	42.4221	23.3878	27.2377	4.76573	13.1744	7.35695	29.6292	45.4926	50.3317	741.976
evm.TU.Contig22.225	0	2	2	5	6	71	5	2	4	6	9	3	3	74	10	62	3	3	4	4	1	4	21	16	0	0.0756633	0.075561	0.176963	0.179943	3.04483	0.168563	0.074387	0.139912	0.223806	0.33	0.105694	0.105777	2.78509	0.382487	2.2769	0.108873	0.108195	0.151717	0.151182	0.0375541	0.148681	0.772797	0.617037	28.2251
evm.TU.Contig84.115	93	113	150	118	247	629	70	37	34	74	808	154	678	889	513	370	114	163	113	60	97	97	664	1430	3.70168	4.10572	5.4427	4.01097	7.11436	25.9067	2.26645	1.32167	1.14216	2.65098	28.4537	5.21082	22.9592	32.134	18.8447	13.05	3.97337	5.64585	4.11631	2.17794	3.49852	3.46276	23.4677	52.9643	668.453
evm.TU.Contig96.165	1638	1834	1657	379	1134	698	635	436	523	1090	1861	1153	1438	1460	765	830	1271	1297	303	594	315	1167	1373	1514	99.5275	101.724	91.7822	19.6662	49.8614	43.8863	31.386	23.7751	26.8204	59.6094	100.043	59.5563	74.3359	80.5617	42.899	44.6889	67.6258	68.5795	16.8494	32.915	17.3435	63.5968	74.0774	85.6024	1170.86
evm.TU.Contig264.253	0	0	0	0	0	0	1	0	0	0	0	0	0	0	0	0	0	0	0	0	0	0	0	0	0	0	0	0	0	0	0.0860829	0	0	0	0	0	0	0	0	0	0	0	0	0	0	0	0	0	NA
evm.TU.Contig96.639	24	26	13	16	32	92	7	4	8	25	25	13	82	183	71	45	12	22	15	22	17	20	37	79	0.771531	0.762975	0.380971	0.439251	0.744414	3.06038	0.183051	0.115401	0.217053	0.723338	0.711038	0.355267	2.24268	5.34244	2.10648	1.28188	0.337801	0.615446	0.441313	0.644976	0.495208	0.576643	1.05616	2.3632	108.278
evm.TU.Contig16.280	652	727	645	550	508	940	781	751	1077	912	751	957	973	979	853	847	1026	1000	979	977	1042	800	779	1000	60.59	61.6712	54.6412	43.6483	34.1617	90.3912	59.0388	62.6325	84.4701	76.2794	61.7454	75.6022	76.9267	82.6196	73.1575	69.7476	83.4908	80.8684	83.2625	82.7994	87.7441	66.6774	64.2801	86.4738	902.873
evm.TU.Contig694.86	1663	1797	1552	1502	2228	1518	2403	1558	2312	1651	1755	2066	2001	1826	1785	2035	1962	1872	2187	2174	1846	2094	2054	1748	48.7811	48.1174	41.5009	37.6253	47.293	46.0761	57.3384	41.0141	57.2375	43.5878	45.5457	51.518	49.9364	48.6415	48.323	52.8952	50.396	47.7849	58.7113	58.1564	49.0668	55.0898	53.499	47.7124	1806.64
evm.TU.Contig16.279	835	917	923	1163	1287	1259	1409	993	1548	1243	1152	1384	1093	1221	1056	1646	1457	1419	1252	1294	1329	1349	1291	1285	129.146	129.467	130.138	153.612	144.044	201.495	177.271	137.832	202.069	173.031	157.637	181.97	143.822	171.497	150.735	225.588	197.329	190.986	177.22	182.519	186.258	187.129	177.299	184.939	1086.52
evm.TU.Contig21.20	4	6	2	0	0	0	3	2	2	3	0	27	66	7	150	1	8	7	0	0	8	21	40	24	0.168941	0.231324	0.0770039	0	0	0	0.103069	0.0758075	0.0712918	0.11404	0	0.969412	2.37154	0.268485	5.84687	0.0374255	0.295871	0.257276	0	0	0.30617	0.795481	1.5001	0.943231	73.2212
evm.TU.Contig12.267	91	54	138	182	311	40	204	76	43	160	206	91	19	20	12	48	23	45	32	32	28	19	14	17	2.43272	1.31777	3.36307	4.15501	6.01635	1.10651	4.43622	1.82335	0.97018	3.84972	4.87223	2.06805	0.43213	0.485542	0.296065	1.13706	0.538413	1.04686	0.782913	0.780151	0.678273	0.455553	0.332326	0.422892	16.34
evm.TU.Contig280.74	80	72	105	165	194	89	57	126	43	95	85	85	96	150	138	106	58	85	30	56	61	82	64	45	3.91744	3.2184	4.68715	6.89997	6.87443	4.5097	2.27049	5.53719	1.77711	4.18693	3.6825	3.53835	3.9994	6.67038	6.2366	4.5995	2.48701	3.62207	1.34446	2.5008	2.70669	3.60132	2.78278	2.05048	124.568
evm.TU.Contig294.21	506	367	469	50	957	144	266	255	151	371	684	295	336	324	72	213	260	535	61	132	122	303	208	225	21.4393	14.1945	18.1151	1.80918	29.3423	6.31346	9.168	9.69631	5.39971	14.1479	25.6405	10.6255	12.1118	12.4667	2.81546	7.99709	9.64652	19.726	2.36539	5.1005	4.68399	11.5143	7.82545	8.87102	231.912
evm.TU.Contig294.24	6	7	4	5	7	2	6	1	9	2	3	5	3	4	1	2	4	2	6	3	1	4	1	3	0.753996	0.802991	0.458231	0.536585	0.636559	0.260071	0.613341	0.112778	0.95454	0.226207	0.333542	0.534142	0.320738	0.456483	0.115978	0.22271	0.440165	0.218712	0.690053	0.34381	0.113871	0.45083	0.111584	0.350809	2.54943
evm.TU.Contig157.3	1	0	1	0	1	0	3	1	1	0	2	1	1	1	0	0	0	2	0	0	0	2	1	0	0.144557	0	0.131779	0	0.104607	0	0.352771	0.129732	0.122004	0	0.255788	0.122888	0.122984	0.131276	0	0	0	0.251591	0	0	0	0.259301	0.128359	0	0.629239
evm.TU.Contig66.558	704	792	871	1236	1506	1274	1405	1268	1200	1009	1169	893	944	1123	589	1072	746	963	1153	1444	1146	1031	952	945	23.4026	24.0332	26.3947	35.0882	36.2275	43.8233	37.9927	37.8283	33.6671	30.1885	34.3809	25.2355	26.6977	33.9014	18.0702	31.5776	21.7154	27.8575	35.0779	43.7761	34.5201	30.7387	28.1005	29.2317	851.207
evm.TU.Contig54.335	2093	2003	1803	1911	2525	1990	1492	1558	1484	1891	2120	1943	2263	2185	1937	1660	1800	1741	1493	1524	1472	1863	1805	1622	67.0242	58.5514	52.6338	52.2605	58.5121	65.9417	38.8654	44.775	40.1079	54.502	60.0633	52.8937	61.6535	63.5419	57.2464	47.1045	50.4745	48.5161	43.7558	44.5067	42.7136	53.5069	51.3245	48.333	2054.3
evm.TU.Contig81.278	28	80	31	37	25	48	29	26	57	45	62	173	38	48	30	24	47	24	35	42	67	21	39	20	1.14399	2.98367	1.15461	1.29098	0.739143	2.02933	0.963821	0.953335	1.96551	1.65477	2.24114	6.00871	1.32087	1.78096	1.13121	0.868899	1.68152	0.853301	1.30872	1.56493	2.48049	0.76952	1.41487	0.760373	37.2969
evm.TU.Contig774.4	30	29	207	213	164	142	205	194	218	138	233	201	194	418	32	21	21	18	180	204	28	81	33	115	1.14795	1.01297	7.22071	6.96039	4.54118	5.62258	6.38101	6.6621	7.04033	4.75271	7.88805	6.53835	6.31561	14.5253	1.13008	0.712056	0.703654	0.599377	6.3036	7.11888	0.970861	2.77986	1.12125	4.09479	205.317
evm.TU.Contig40.76	108	158	135	41	99	97	110	109	126	173	105	141	119	37	73	42	71	64	60	119	91	88	120	102	4.48434	5.98862	5.10994	1.45382	2.97463	4.16765	3.71536	4.0617	4.41549	6.46517	3.85723	4.97695	4.20371	1.39516	2.7974	1.54531	2.58149	2.31249	2.28003	4.5061	3.42384	3.27712	4.42427	3.941	73.0759
evm.TU.Contig630.21	1149	1485	1595	677	836	422	649	472	595	1301	850	886	510	157	352	396	864	548	203	295	300	750	589	474	40.1676	47.3889	50.8304	20.2113	21.1487	15.2656	18.4558	14.8083	17.5552	40.9347	26.2897	26.3305	15.1683	4.98428	11.3568	12.2671	26.4489	16.671	6.49479	9.40495	9.50327	23.5154	18.2834	15.4193	325.922
evm.TU.Contig16.218	157	139	141	241	307	203	220	197	212	141	214	198	144	141	108	191	150	241	207	288	221	149	176	99	6.46229	5.22271	5.2907	8.47139	9.14424	8.64625	7.36618	7.27712	7.36472	5.22354	7.79312	6.92821	5.04266	5.27051	4.10267	6.96647	5.40649	8.63235	7.79777	10.8108	8.24281	5.50057	6.43258	3.79187	126.191
evm.TU.Contig188.144	236	237	230	327	371	376	465	293	335	235	343	341	312	273	209	330	322	373	312	349	349	326	342	338	10.7622	9.86579	9.56145	12.7347	12.2429	17.7428	17.2494	11.9912	12.8934	9.6453	13.8387	13.2194	12.1047	11.3057	8.79613	13.3351	12.8583	14.8021	13.0214	14.5142	14.4215	13.3334	13.8484	14.3429	254.447
evm.TU.Contig694.140	64	63	44	124	156	103	254	113	203	61	80	96	364	242	192	186	98	94	451	254	347	105	141	308	2.56587	2.30563	1.6081	4.24548	4.52586	4.27303	8.28362	4.06573	6.86884	2.20112	2.83762	3.27186	12.4156	8.81081	7.10414	6.60783	3.44047	3.27949	16.5479	9.2868	12.6061	3.77553	5.01948	11.4904	254.582
evm.TU.Contig172.22	40	66	49	11	23	6	23	27	39	39	32	34	39	19	49	23	33	56	56	27	35	59	74	63	1.2197	1.83709	1.36206	0.286442	0.507508	0.189317	0.570497	0.738862	1.00367	1.07033	0.863284	0.881335	1.01174	0.52613	1.37894	0.62146	0.881139	1.48596	1.56277	0.750819	0.967069	1.61354	2.0036	1.78758	34.6579
evm.TU.Contig14.38	333	283	291	378	477	853	187	105	147	273	507	276	456	650	430	283	177	174	202	139	158	313	563	398	14.1363	10.9666	11.2614	13.7036	14.6532	37.4703	6.45754	4.00026	5.26676	10.4307	19.042	9.96027	16.469	25.0584	16.8468	10.6456	6.57966	6.42787	7.84797	5.38129	6.0778	11.9171	21.222	15.722	495.176
evm.TU.Contig139.283	187	209	292	323	358	265	450	292	402	357	392	307	213	229	370	348	218	431	347	270	253	306	316	307	3.92402	4.00342	5.58573	5.7882	5.4362	5.75414	7.68131	5.49894	7.1195	6.74244	7.27758	5.47643	3.8026	4.36387	7.16553	6.47085	4.00575	7.87032	6.66397	5.16693	4.81068	5.75899	5.88793	5.99459	264.421
evm.TU.Contig555.371	321	356	304	203	436	841	198	98	197	203	582	247	605	704	391	294	213	186	249	218	153	269	514	657	7.99508	8.09398	6.90237	4.31782	7.85826	21.675	4.01158	2.19053	4.14112	4.55064	12.8248	5.22978	12.8199	15.9234	8.98774	6.48869	4.64552	4.0314	5.67584	4.95168	3.45307	6.00904	11.3675	15.227	545.022
evm.TU.Contig180.631	0	0	0	0	0	1	0	0	0	0	0	0	0	0	0	0	0	0	0	0	0	1	0	0	0	0	0	0	0	0.0429118	0	0	0	0	0	0	0	0	0	0	0	0	0	0	0	0.0371935	0	0	NA
evm.TU.Contig906.67	25	15	17	94	115	26	26	69	32	28	77	49	229	190	188	186	36	75	145	165	93	64	154	118	0.77768	0.425938	0.482078	2.49712	2.5887	0.836911	0.657911	1.92627	0.840126	0.783931	2.11915	1.29576	6.06048	5.36737	5.39728	5.12704	0.98062	2.03024	4.12803	4.68084	2.62144	1.78557	4.25371	3.41565	195.113
evm.TU.Contig180.629	0	0	0	0	0	0	0	8	0	0	3	0	0	0	0	0	0	0	2	0	0	0	0	0	0	0	0	0	0	0	0	0.297734	0	0	0.110069	0	0	0	0	0	0	0	0.0759058	0	0	0	0	0	NA
evm.TU.Contig12.186	721	507	563	1214	1408	664	853	339	451	608	812	657	638	633	605	766	689	644	814	755	455	816	671	553	30.7255	19.7227	21.8715	44.1807	43.4198	29.2803	29.5696	12.9649	16.2208	23.3199	30.6147	23.8011	23.131	24.497	23.7944	28.9257	25.7111	23.8822	31.7469	29.3419	17.57	31.1881	25.3905	21.929	604.591
evm.TU.Contig477.648	701	798	710	525	957	1053	618	294	485	764	911	601	786	785	663	642	702	944	432	441	449	667	743	728	32.0334	33.2876	29.5768	20.4878	31.6461	49.7919	22.9724	12.057	18.7051	31.4223	36.8311	23.3469	30.5576	32.5763	27.9612	25.9964	28.0905	37.539	18.0668	18.3782	18.5921	27.3367	30.1481	30.9562	718.64
evm.TU.Contig54.306	1057	1108	1483	462	1606	1118	1102	401	547	1077	2436	1033	1749	1522	958	839	924	988	821	504	586	939	1030	1452	35.2431	33.7235	45.0762	13.155	38.7496	38.5732	29.8891	11.9991	15.3929	32.3202	71.86	29.2798	49.6134	46.0851	29.4795	24.7887	26.9779	28.6669	25.0527	15.3253	17.7049	28.0801	30.4945	45.0502	1351.37
evm.TU.Contig39.62	116	131	131	150	256	106	207	128	176	155	161	131	214	189	186	161	111	130	142	188	145	133	151	147	5.36736	5.5331	5.52562	5.92714	8.57166	5.0752	7.79122	5.31519	6.87304	6.45496	6.59082	5.1528	8.42417	7.94166	7.94277	6.60117	4.49742	5.23445	6.01318	7.93303	6.07949	5.51937	6.20391	6.32923	189.524
evm.TU.Contig301.66	303	351	329	353	422	414	588	437	653	291	269	316	394	389	341	546	485	350	516	504	510	338	351	348	10.6655	11.2783	10.5571	10.6112	10.7492	15.0795	16.8364	13.8047	19.3994	9.21919	8.37729	9.45576	11.7991	12.4347	11.0777	17.0304	14.9493	10.721	16.6228	16.1789	16.267	10.6707	10.9707	11.3986	361.71
evm.TU.Contig625.111	1691	1932	2082	2070	2547	1947	2045	2658	2131	1749	1864	1997	3294	2498	3594	2238	2170	2220	3203	1752	2504	3099	3032	3188	40.3309	42.0626	45.2671	42.1615	43.9588	48.0513	39.6753	56.8926	42.8955	37.5443	39.3325	40.4894	66.8389	54.1046	79.1096	47.2985	45.3202	46.0758	69.9141	38.1072	54.116	66.2905	64.211	70.7529	3031.71
evm.TU.Contig188.32	1157	1245	1205	1805	1548	1375	1476	2567	1789	1051	1343	1526	2190	2029	2001	2068	1714	1772	2494	1580	2181	1997	1804	1933	27.0123	26.5333	25.6461	35.9879	26.153	33.2181	28.0315	53.7849	35.251	22.0846	27.7405	30.2867	43.4993	43.0186	43.1153	42.7829	35.041	36.0012	53.289	33.6406	46.1402	41.8158	37.3981	41.9943	2003.19
evm.TU.Contig421.540	2	7	10	25	59	22	17	9	4	7	23	10	30	154	8	19	9	24	25	15	21	3	23	10	0.0679485	0.217091	0.309711	0.725338	1.45052	0.773423	0.46982	0.274409	0.114695	0.214046	0.691335	0.288814	0.867125	4.75135	0.250839	0.571999	0.26775	0.709555	0.777326	0.46475	0.646495	0.0914126	0.693846	0.316141	61.6717
evm.TU.Contig81.1074	824	931	1359	625	1299	591	753	1013	1053	978	1452	1319	2450	1485	1893	1334	1007	1471	1489	688	1015	1467	1536	1674	15.8659	16.3637	23.8541	10.277	18.0996	11.7752	11.7941	17.5046	17.1119	16.9486	24.7351	21.5899	40.1341	25.9663	33.639	22.7607	16.9787	24.6476	26.2388	12.081	17.7092	25.3339	26.2611	29.9932	1870.32
evm.TU.Contig81.564	523	493	601	735	643	428	592	749	686	411	507	500	730	635	801	613	556	761	922	554	537	592	756	825	15.042	12.9433	15.7574	18.0527	13.3825	12.7378	13.8503	19.3327	16.6518	10.6391	12.901	12.2248	17.8623	16.5854	21.2615	15.6227	14.0029	19.0465	24.2688	14.5309	13.9951	15.2708	19.3069	22.0795	699.718
evm.TU.Contig411.50	460	516	789	1710	992	880	252	1624	670	557	1116	1140	2739	3213	2662	1445	655	1039	2841	614	1070	1604	2469	2801	8.32563	8.52518	13.018	26.4306	12.9925	16.4811	3.71016	26.3786	10.2345	9.07348	17.8704	17.5402	42.1757	52.8101	44.4656	23.175	10.381	16.3644	47.0591	10.1346	17.5485	26.0375	39.6795	47.1741	2777.63
evm.TU.Contig81.1154	278	312	695	983	805	576	581	1669	494	514	770	706	522	1032	737	1056	837	963	1265	978	879	626	881	914	4.02834	4.12696	9.18064	12.1643	8.44111	8.63671	6.84841	21.7042	6.04146	6.70353	9.87149	8.69671	6.43521	13.5802	9.8561	13.5593	10.6205	12.1432	16.7759	12.9241	11.5416	8.13562	11.3356	12.3242	742.763
evm.TU.Contig63.485	2805	2636	3220	4157	4708	3127	3350	2519	2472	2981	3621	3039	7720	7097	6321	3050	2698	2939	3408	2108	2161	3147	3038	5523	44.2713	37.9777	46.3289	56.0299	53.771	51.0695	43.0097	35.6799	32.9284	42.3458	50.5625	40.7745	103.661	101.721	92.0728	42.6561	37.2879	40.3658	49.2269	30.3416	30.9058	44.5472	42.5758	81.1139	6795.56
evm.TU.Contig766.84	1861	2184	2493	2609	3255	3154	2169	2566	2201	1998	2576	2035	2715	2992	2497	2618	2252	2315	3310	2686	2535	2563	2528	2847	26.7853	28.6945	32.71	32.0683	33.9019	46.974	25.3947	33.1447	26.7365	25.8825	32.8026	24.8991	33.2454	39.1074	33.1685	33.3897	28.3829	28.9953	43.6006	35.2562	33.0617	33.0853	32.3083	38.1302	2643
evm.TU.Contig96.92	2193	3046	4190	4320	2730	2200	3201	3680	2885	3076	3524	2850	4213	3374	3461	3587	2004	4029	3853	1735	2795	3088	3535	3085	48.2458	61.1709	84.0314	81.1625	43.4616	50.0827	57.2847	72.6565	53.5673	60.9068	68.591	53.3009	78.8538	67.4081	70.2714	69.9269	38.6061	77.1335	77.577	34.8096	55.7184	60.9302	69.0551	63.1548	3551.07
evm.TU.Contig906.324	784	891	876	2343	1638	1451	850	2141	1210	938	1137	878	2248	1348	2251	2153	964	1716	3362	1785	1413	1717	2766	1584	18.1697	18.8496	18.5072	46.3718	27.4705	34.7971	16.0244	44.5301	23.6673	19.5656	23.3132	17.2979	44.3239	28.3705	48.1462	44.2147	19.5634	34.6077	71.3085	37.7266	29.6735	35.6891	56.9205	34.1599	1885.39
evm.TU.Contig180.370	44	79	77	150	162	61	115	179	149	45	127	113	233	86	152	130	103	112	225	101	109	115	163	197	0.739669	1.21229	1.18	2.15341	1.97071	1.06111	1.57259	2.7005	2.114	0.680858	1.88886	1.61485	3.33236	1.31289	2.35822	1.93651	1.51621	1.63843	3.46163	1.54841	1.66038	1.73387	2.43309	3.08164	150.532
evm.TU.Contig437.101	1940	2555	2785	1738	1499	1114	2414	2040	1687	2307	2231	1531	2898	2913	1986	1306	1183	1785	1905	886	1549	1792	1826	1528	51.1005	61.434	66.8738	39.0953	28.5725	30.3636	51.7242	48.2237	37.5036	54.6928	51.9917	34.2821	64.9431	69.6804	48.2791	30.4831	27.2864	40.9154	45.9232	21.2832	36.9719	42.3347	42.7081	37.4523	2500.51
evm.TU.Contig81.1175	5	40	98	49	36	22	8	337	9	5	64	41	1	51	10	62	31	23	21	101	11	18	11	13	0.471918	3.44628	8.43198	3.94951	2.45879	2.14864	0.614213	28.5452	0.716923	0.424742	5.34426	3.28965	0.0802985	4.37133	0.87107	5.18538	2.5621	1.88908	1.81397	8.69354	0.940775	1.52372	0.921881	1.14175	20.1777
evm.TU.Contig421.260	15	36	91	205	59	33	33	784	387	126	67	197	18	32	146	293	74	194	873	510	292	410	308	441	0.718092	1.57321	3.97134	8.38095	2.04392	1.63473	1.28509	33.683	15.6363	5.42898	2.83775	8.01722	0.733115	1.39119	6.45057	12.4294	3.10211	8.08194	38.2487	22.2658	12.6668	17.6038	13.0926	19.6453	65.2637
evm.TU.Contig44.244	5	1	3	13	9	1	29	23	36	10	6	9	0	1	0	6	7	7	13	12	14	2	4	1	0.55018	0.100445	0.300928	1.2216	0.716637	0.113862	2.59576	2.27127	3.34326	0.990361	0.584113	0.841872	0	0.0999266	0	0.58503	0.674481	0.670282	1.30916	1.20419	1.39591	0.197378	0.390823	0.102392	0.323283
evm.TU.Contig565.23	4	4	5	16	21	27	8	81	0	12	9	7	0	17	3	30	11	18	6	58	17	4	4	10	0.322487	0.294379	0.367476	1.1016	1.22516	2.25248	0.524656	5.86062	0	0.870748	0.641956	0.479755	0	1.24465	0.223218	2.14321	0.776573	1.26284	0.442707	4.26441	1.24193	0.289232	0.28635	0.75021	6.51111
evm.TU.Contig81.1077	0	0	9	6	0	1	0	36	1	0	1	5	0	1	1	9	0	1	11	106	9	1	0	5	0	0	0.762436	0.476163	0	0.0961609	0	3.00236	0.0784309	0	0.0822175	0.394996	0	0.0843918	0.085765	0.74112	0	0.0808684	0.935534	8.98335	0.757866	0.0833467	0	0.432369	0.661717
evm.TU.Contig411.22	8	19	18	25	12	10	0	424	2	2	19	24	14	60	38	75	34	15	75	134	19	24	26	29	0.499824	1.08362	1.0252	1.33388	0.542539	0.646505	0	23.7739	0.105461	0.112465	1.05025	1.2747	0.74416	3.40428	2.19113	4.15223	1.86013	0.815537	4.28847	7.63503	1.07567	1.34485	1.4424	1.686	36.5408
evm.TU.Contig81.569	21	22	16	4	4	0	8	12	6	1	8	1	0	3	0	0	0	0	6	11	1	1	0	3	1.44243	1.37941	1.00185	0.234631	0.198819	0	0.44699	0.739711	0.347824	0.0618207	0.486156	0.0583907	0	0.18713	0	0	0	0	0.377172	0.689043	0.0622402	0.0616041	0	0.191746	0.969848
evm.TU.Contig63.244	11	6	13	0	2	0	1	22	0	5	3	8	2	2	0	5	4	0	0	0	2	8	3	0	1.23497	0.614908	1.3305	0	0.162486	0	0.0913265	2.21663	0	0.505235	0.297986	0.763525	0.191032	0.203911	0	0.497424	0.393244	0	0	0	0.203465	0.805544	0.299069	0	1.25848
evm.TU.Contig63.243	3	2	1	36	59	8	45	21	15	16	2	5	0	3	2	5	3	6	7	10	16	1	5	0	0.155148	0.0944169	0.0471446	1.58993	2.208	0.428115	1.89309	0.974655	0.654712	0.744739	0.0915095	0.219819	0	0.140894	0.0954578	0.229133	0.135858	0.270024	0.331312	0.471633	0.749793	0.0463831	0.229605	0	1.64672
evm.TU.Contig63.241	0	0	0	1	8	0	4	46	5	0	0	0	0	2	0	5	0	0	4	3	6	0	1	0	0	0	0	0.095393	0.646663	0	0.363461	4.61137	0.471378	0	0	0	0	0.202881	0	0.494912	0	0	0.40892	0.305608	0.607314	0	0.0991862	0	0.646565
evm.TU.Contig341.320	61	111	196	208	124	17	78	526	483	192	83	200	17	32	169	135	118	301	967	337	249	709	274	615	4.90006	8.13934	14.3527	14.2688	7.20802	1.41308	5.09682	37.9196	32.7456	13.8814	5.89876	13.6575	1.1618	2.33436	12.529	9.60944	8.30025	21.0409	71.0905	24.6877	18.1246	51.0803	19.5438	45.9704	72.7417
evm.TU.Contig298.98	0	0	0	0	3	0	1	4	2	1	0	0	5	3	2	3	1	0	1	2	8	0	9	10	0	0	0	0	0.167884	0	0.0629067	0.277607	0.130535	0.0696023	0	0	0.328962	0.210684	0.142742	0.205579	0.0677177	0	0.0707747	0.14105	0.560597	0	0.618006	0.719607	3.1765
evm.TU.Contig298.92	0	1	0	2	5	0	1	13	2	0	5	0	10	1	0	0	0	0	0	2	5	0	0	1	0	0.15773	0	0.295122	0.625191	0	0.140557	2.01591	0.291665	0	0.764366	0	1.47005	0.156916	0	0	0	0	0	0.315159	0.782865	0	0	0.160787	3.38284
evm.TU.Contig298.93	0	0	0	33	17	4	3	59	5	0	27	7	0	5	0	3	0	3	0	4	77	0	0	3	0	0	0	3.18009	1.38818	0.467067	0.275377	5.97493	0.476188	0	2.69556	0.671493	0	0.512379	0	0.299977	0	0.294592	0	0.411636	7.87339	0	0	0.315012	1.61641
evm.TU.Contig298.94	0	0	0	2	0	1	6	11	0	4	3	1	0	6	1	0	0	7	2	5	7	2	3	3	0	0	0	0.239086	0	0.14485	0.683215	1.38189	0	0.503956	0.37154	0.118999	0	0.762731	0.12919	0	0	0.852701	0.256222	0.638296	0.887908	0.251095	0.37289	0.390774	2.27813
evm.TU.Contig298.95	0	0	0	0	0	0	2	1	0	1	0	0	1	0	0	0	1	0	0	1	0	0	0	1	0	0	0	0	0	0	0.24478	0.135027	0	0.135417	0	0	0.128004	0	0	0	0.13175	0	0	0.137212	0	0	0	0.140005	NA
evm.TU.Contig298.96	1	10	8	24	41	10	35	102	64	14	24	33	90	89	50	40	36	39	39	50	140	7	20	46	0.0714227	0.651975	0.520874	1.46386	2.11906	0.739062	2.03347	6.53797	3.85789	0.89996	1.51656	2.00364	5.46877	5.77262	3.29581	2.53156	2.25152	2.42396	2.54926	3.25675	9.06067	0.448404	1.26839	3.05721	73.2299
evm.TU.Contig298.97	0	0	0	0	0	0	0	4	0	0	0	0	0	0	0	0	0	0	0	0	0	0	0	0	0	0	0	0	0	0	0	0.393048	0	0	0	0	0	0	0	0	0	0	0	0	0	0	0	0	NA
evm.TU.Contig298.101	13	23	8	78	52	11	27	76	44	46	82	41	43	36	39	25	36	22	46	17	27	9	33	26	0.809167	1.30682	0.453933	4.1461	2.34218	0.708487	1.36707	4.24536	2.31143	2.57698	4.51564	2.16944	2.27706	2.0349	2.24035	1.37888	1.96216	1.19163	2.62039	0.964989	1.52284	0.502426	1.82387	1.50591	37.9932
evm.TU.Contig298.100	4	17	2	18	59	31	35	108	66	58	66	24	58	71	39	31	7	23	53	39	130	19	40	56	0.344237	1.33549	0.156904	1.32288	3.67428	2.7606	2.45018	8.34118	4.79375	4.49246	5.02519	1.75581	4.24655	5.54884	3.09755	2.36402	0.527513	1.72247	4.17433	3.06084	10.1376	1.46651	3.05663	4.48453	53.8975
evm.TU.Contig481.34	0	0	0	169	77	52	1	227	3	5	22	10	7	22	1	48	7	41	13	147	99	4	14	4	0	0	0	10.22	3.94571	3.81031	0.057603	14.426	0.179295	0.31867	1.37831	0.601979	0.421717	1.41476	0.0653535	3.01194	0.434058	2.52651	0.842498	9.49311	6.35249	0.254043	0.880291	0.263574	9.59234
evm.TU.Contig14.24	128	94	165	42	26	41	43	79	113	107	22	64	129	127	208	65	43	43	107	81	54	68	138	92	4.93493	3.30821	5.79912	1.38284	0.725382	1.63568	1.34857	2.73341	3.67691	3.7129	0.75042	2.09759	4.23128	4.44653	7.401	2.22063	1.4517	1.44266	3.77544	2.84797	1.88652	2.35134	4.72428	3.30058	150.92
evm.TU.Contig555.392	37	29	51	36	48	12	103	71	72	44	52	58	121	51	117	32	45	22	113	120	64	50	74	86	1.37845	0.986235	1.73207	1.14536	1.29405	0.462609	3.12146	2.37385	2.26388	1.47537	1.71397	1.8369	3.83516	1.72546	4.02282	1.0564	1.46804	0.71324	3.85283	4.07707	2.16055	1.67068	2.44797	2.98138	93.1049
evm.TU.Contig45.360	1608	1621	1744	3074	2987	1567	2991	2351	2722	1725	1461	1750	1750	1904	1596	2222	2619	2507	3212	3637	2703	1787	1422	1462	61.5303	56.6214	60.8354	100.452	82.7105	62.0464	93.1005	80.735	87.9072	59.4088	49.4611	56.9259	56.9707	66.1632	56.3627	75.3424	87.7558	83.48	112.484	126.918	93.7228	61.3285	48.3157	52.0572	1691.09
evm.TU.Contig394.192	2030	2480	1928	1966	1857	1229	3753	3035	4131	2871	1498	2012	967	670	991	1668	3555	2958	2420	3269	2221	1999	1488	1301	57.5615	64.1922	49.8368	47.607	38.104	36.0606	86.566	77.2327	98.861	73.2703	37.5802	48.499	23.3278	17.2527	25.9338	41.9107	88.27	72.9893	62.8007	84.5337	57.0665	50.8375	37.4649	34.3277	847.847
evm.TU.Contig555.304	605	718	605	716	718	655	769	528	693	724	633	931	675	571	752	666	875	774	636	610	602	872	683	684	20.9952	22.7448	19.1393	21.2191	18.0306	23.5207	21.7082	16.4439	20.297	22.6132	19.4347	27.4652	19.9287	17.9948	24.0845	20.48	26.5895	23.3738	20.1992	19.3051	18.9303	27.1403	21.046	22.0877	645.617
evm.TU.Contig14.98	681	759	732	562	799	601	628	616	789	644	607	781	911	847	1168	808	866	949	1055	970	788	937	926	777	25.5141	25.9579	25.0007	17.9813	21.6622	23.2998	19.1393	20.7119	24.9485	21.7159	20.1202	24.8744	29.0377	28.818	40.3861	26.8248	28.4111	30.9403	36.1742	33.1424	26.752	31.4853	30.8056	27.0885	947.838
novel.593	4229	6051	8096	4662	3589	4777	5566	4891	3077	8870	5434	5920	2697	4657	6413	5366	6449	6360	3665	4462	2843	4996	1542	2316	231.328	302.143	403.709	217.778	142.065	270.39	247.666	240.102	142.054	436.69	262.979	275.285	125.511	231.336	323.749	260.096	308.902	302.742	183.476	222.587	140.917	245.103	74.8964	117.886	4501.07
evm.TU.Contig600.107_evm.TU.Contig600.108	2381	2009	2733	920	230	53	171	599	35	1852	925	628	1548	1958	1924	143	265	192	81	596	206	133	146	35	166.825	128.492	174.562	55.0479	11.6614	3.84258	9.74609	37.6647	2.06968	116.789	57.3396	37.4051	92.2749	124.584	124.412	8.87831	16.2587	11.7065	5.19398	38.0826	13.0787	8.35773	9.08323	2.28192	1757.76
evm.TU.Contig600.110	45	39	47	73	54	13	82	67	51	50	29	7	47	39	77	17	22	40	56	87	42	18	20	38	2.40598	1.90344	2.29079	3.33314	2.08928	0.719231	3.56637	3.21485	2.30136	2.40607	1.37179	0.318161	2.13791	1.89361	3.79951	0.805418	1.03001	1.86108	2.74019	4.24207	2.03482	0.863153	0.949502	1.89058	53.0474
evm.TU.Contig625.37	162	215	213	44	97	55	31	38	35	128	47	47	98	189	107	64	41	44	26	26	30	37	33	57	5.45356	6.60691	6.5366	1.26494	2.36298	1.9159	0.848906	1.14804	0.994413	3.87824	1.39983	1.34503	2.80674	5.77795	3.32434	1.90914	1.20861	1.28897	0.801036	0.79821	0.91513	1.11713	0.986427	1.78555	127.297
novel.589	12	4	5	35	12	48	5	0	0	4	1	0	8	100	5	22	3	4	0	5	0	1	18	1	0.672483	0.204623	0.255433	1.67502	0.486636	2.78347	0.227931	0	0	0.201753	0.0495805	0	0.381418	5.08917	0.258599	1.09248	0.147217	0.195068	0	0.255534	0	0.0502615	0.895691	0.0521472	36.4681
evm.TU.Contig600.109	0	0	3	0	0	0	0	0	0	0	0	0	0	0	1	0	0	0	0	0	0	0	0	0	0	0	0.117678	0	0	0	0	0	0	0	0	0	0	0	0.0397122	0	0	0	0	0	0	0	0	0	0.338434
evm.TU.Contig12.510	117	111	109	123	160	70	177	164	187	224	135	171	65	52	100	184	144	167	110	126	114	194	116	85	6.82774	5.91301	5.79862	6.12982	6.75669	4.22702	8.40228	8.58898	9.21015	11.7652	6.97005	8.48314	3.22712	2.75576	5.38577	9.51484	7.35853	8.48073	5.87486	6.70565	6.02827	10.1538	6.01084	4.61574	70.5413
evm.TU.Contig477.674	11	10	5	23	42	2	30	20	26	14	18	20	39	47	27	14	19	8	20	36	8	5	15	5	0.408432	0.338939	0.16924	0.7293	1.12849	0.0768426	0.906111	0.666444	0.814769	0.467858	0.591304	0.631286	1.23198	1.58479	0.925225	0.460625	0.617758	0.258489	0.679627	1.21901	0.269162	0.166507	0.494543	0.172754	36.2643
evm.TU.Contig555.437	185	220	172	194	273	56	158	131	181	257	227	254	152	109	228	157	163	221	125	193	130	161	127	121	9.06577	9.84125	7.68367	8.11869	9.68096	2.83966	6.29829	5.76117	7.48592	11.3351	9.8417	10.5812	6.33706	4.85072	10.3116	6.8175	6.99452	9.42433	5.60604	8.6252	5.77262	7.0761	5.52615	5.51759	158.906
evm.TU.Contig555.501	0	0	0	0	0	0	0	1	0	0	0	0	0	0	0	0	0	0	0	0	0	0	0	0	0	0	0	0	0	0	0	0.0520969	0	0	0	0	0	0	0	0	0	0	0	0	0	0	0	0	NA
evm.TU.Contig54.286	549	596	568	473	983	191	438	407	476	706	526	554	582	342	457	524	485	612	307	234	193	527	343	381	22.1038	21.9046	20.8473	16.2632	28.6398	7.95743	14.345	14.706	16.1747	25.5834	18.7366	18.9615	19.9356	12.5045	16.9812	18.6947	17.0991	21.4423	11.3122	8.5919	7.04123	19.0301	12.2624	14.2742	443.294
evm.TU.Contig66.1083	121	208	171	96	383	55	233	185	223	125	196	265	376	96	263	194	252	228	322	235	267	331	360	290	4.26824	6.69763	5.49878	2.89191	9.77652	2.00757	6.68577	5.85654	6.63898	3.96855	6.11688	7.94654	11.284	3.07525	8.562	6.06397	7.78397	6.99879	10.3952	7.55979	8.53435	10.4719	11.2759	9.51902	235.083
evm.TU.Contig66.631	41	83	68	81	233	27	126	98	72	78	67	59	38	26	35	85	73	100	67	65	60	41	28	35	6.29727	11.637	9.52103	10.6244	25.8968	4.29118	15.7424	13.5083	9.33328	10.7826	9.10445	7.70352	4.96549	3.6265	4.96127	11.5686	9.81812	13.3657	9.41795	9.10459	8.35056	5.6479	3.81867	5.00227	31.8769
evm.TU.Contig66.630	74	87	75	75	147	13	87	107	82	91	102	92	87	42	31	72	100	108	89	90	81	75	57	50	7.83098	8.40423	7.23523	6.77792	11.257	1.42355	7.48921	10.1619	7.32372	8.66732	9.54982	8.27639	7.83275	4.03627	3.02763	6.75164	9.26663	9.94565	8.61961	8.68571	7.76722	7.11837	5.35605	4.92363	50.6875
evm.TU.Contig154.270	1321	1526	1657	581	892	673	824	932	1483	862	783	766	1498	1444	1989	949	605	782	1062	1048	1000	1774	1491	1842	51.7112	54.5295	59.1305	19.4227	25.2679	27.261	26.2387	32.7419	48.9956	30.3703	27.1178	25.4906	49.889	51.3329	71.8577	32.9186	20.7384	26.6388	38.047	37.413	35.4714	62.2832	51.8257	67.0969	1598.29
evm.TU.Contig477.194	1507	1657	1981	1163	1387	1053	931	1315	868	1584	1296	1130	1267	1298	1634	1093	939	863	1042	1059	865	1207	896	1233	47.2106	47.3852	56.5741	31.114	31.4431	34.1349	23.7251	36.9707	22.9498	44.6622	35.9205	30.0935	33.7686	36.9273	47.2427	30.3416	25.759	23.5267	29.8749	30.2552	24.5549	33.9132	24.9241	35.9435	1360.27
evm.TU.Contig16.458	3214	4745	7032	3393	2281	4300	4989	2282	2753	6450	6063	4490	1171	4974	3271	2160	3909	2984	2588	1849	2369	2791	1408	1392	209.69	282.593	418.231	189.045	107.691	290.298	264.775	133.614	151.59	378.747	349.969	249.027	64.9978	294.702	196.955	124.875	223.323	169.416	154.528	110.014	140.053	163.315	81.5679	84.5086	3073.3
evm.TU.Contig55.187	241	638	1253	1998	747	1270	2752	1730	970	1394	2056	1705	101	788	342	1946	1775	1224	795	1176	1747	751	344	647	10.6392	25.7104	50.4256	75.325	23.8636	58.0151	98.8266	68.5402	36.1408	55.3879	80.3021	63.9862	3.79337	31.5912	13.934	76.1251	68.6165	47.0218	32.1198	47.3455	69.8847	29.735	13.4846	26.5784	401.393
evm.TU.Contig600.200	1570	2915	6330	2748	1703	2026	5953	1714	2091	7444	5783	4436	481	2863	2187	2000	3859	3308	1789	872	1865	3328	896	1399	56.9558	96.532	209.338	85.1345	44.707	76.0541	175.674	55.8027	64.0215	243.054	185.61	136.804	14.8455	94.3205	73.2223	64.2925	122.589	104.431	59.3966	28.8492	61.3075	108.282	28.8624	47.2266	1812.88
evm.TU.Contig967.100	5135	5851	10544	8257	6688	4044	15753	5053	7701	13866	10781	9566	1070	3672	3526	6833	11249	9229	4679	3407	5971	8892	2329	4085	287.039	298.556	537.296	394.162	270.533	233.914	716.303	253.488	363.314	697.608	533.177	454.57	50.8857	186.402	181.903	338.458	550.621	448.932	239.369	173.681	302.444	445.795	115.6	212.483	2707.79
evm.TU.Contig475.20	6045	7017	7596	6189	7401	10161	13557	7120	12258	11104	9895	9862	3297	5940	4334	9474	9428	11094	8031	11105	8597	10213	5024	7267	298.213	315.992	341.603	260.736	264.206	518.694	544.034	315.222	510.367	493.024	431.873	413.584	138.376	266.111	197.322	414.148	407.274	476.259	362.587	499.605	384.302	451.875	220.072	333.592	4395.81
evm.TU.Contig21.427	1396	1600	2119	3119	3828	6125	5508	3716	3740	3484	2428	1906	1051	3150	711	2549	1700	2857	2943	6786	3601	1842	779	1215	69.2279	72.4286	95.793	132.088	137.369	314.302	222.189	165.378	156.531	155.501	106.526	80.3503	44.3414	141.858	32.5403	112.01	73.8214	123.291	133.567	306.894	161.814	81.9257	34.302	56.0664	1580.53
evm.TU.Contig45.170	1260	2045	1805	1004	1583	1436	2538	1417	2698	2378	1443	1740	516	542	491	1135	2504	2761	1614	2303	1205	1399	1169	1160	51.7026	76.6002	67.519	35.1825	47.0051	60.9735	84.7161	52.1817	93.4367	87.8239	52.3865	60.696	18.0137	20.197	18.5943	41.2696	89.9733	98.5901	60.612	86.1816	44.8049	51.4866	42.5934	44.2926	499.264
evm.TU.Contig292.18	1449	1815	2379	1474	1707	1863	5439	2359	4394	3945	3037	3392	743	1550	1418	3868	3732	3758	3092	2491	3366	3415	1269	3524	29.8861	34.1721	44.7303	25.9627	25.4775	39.7611	91.2541	43.6652	76.4882	73.233	55.4187	59.4738	13.0377	29.0322	26.9919	70.6935	67.4031	67.4501	58.3652	46.8547	62.9088	63.1723	23.2406	67.6344	1208.31
evm.TU.Contig184.28	58	85	109	220	224	42	296	83	162	259	136	169	4	28	27	284	193	82	45	27	109	151	28	56	2.807	3.75515	4.80892	9.0926	7.84485	2.10334	11.653	3.60495	6.61703	11.2817	5.82323	6.95297	0.164697	1.23061	1.20596	12.1794	8.17917	3.45345	1.99315	1.19167	4.7801	6.5543	1.20326	2.52193	19.4135
evm.TU.Contig154.329	21	18	34	51	30	16	117	16	18	83	46	97	0	15	12	73	32	17	10	17	37	35	19	13	1.08773	0.851079	1.60542	2.25592	1.12447	0.857566	4.92971	0.743754	0.786881	3.86937	2.108	4.27114	0	0.705571	0.573641	3.35056	1.45141	0.766261	0.474041	0.803027	1.7366	1.62594	0.87386	0.626581	8.91045
evm.TU.Contig16.306	0	4	0	0	2	0	2	0	0	0	2	0	0	0	0	0	0	0	0	0	0	0	0	0	0	0.173798	0	0	0.0688877	0	0.0774376	0	0	0	0.0842229	0	0	0	0	0	0	0	0	0	0	0	0	0	0
evm.TU.Contig154.335	503	520	636	417	1352	907	884	497	699	537	858	998	1302	888	1043	1042	880	1052	893	989	684	891	837	913	22.4294	21.1664	25.8531	15.8795	43.6263	41.8505	32.0652	19.8889	26.3063	21.5517	33.8491	37.8311	49.3936	35.9591	42.9229	41.1727	34.3613	40.8216	36.443	40.2183	27.6377	35.6338	33.1406	37.8836	1038.42
evm.TU.Contig184.720	489	630	560	566	501	613	608	539	604	494	622	660	520	513	644	548	716	660	495	434	492	562	413	446	24.034	28.2653	25.0907	23.7567	17.8188	31.1762	24.3083	23.7746	25.0547	21.8526	27.047	27.576	21.7436	22.8972	29.2119	23.8666	30.8155	28.2285	22.2657	19.453	21.9119	24.7736	18.0241	20.3978	542.893
evm.TU.Contig184.722	6549	8299	9855	6216	6368	4273	11858	6051	11107	10829	10401	8727	2588	4851	3322	4474	6958	7133	6055	4038	4979	9790	3772	5025	206.039	238.339	282.643	167.008	144.978	139.108	303.473	170.848	294.921	306.636	289.508	233.405	69.2708	138.597	96.4564	124.728	191.689	195.287	174.342	115.856	141.943	276.244	105.374	147.11	3484.34
evm.TU.Contig184.719	26	20	34	14	29	28	78	62	61	22	32	61	17	1	19	22	42	20	49	33	36	76	91	25	1.37134	0.962932	1.63477	0.630594	1.10686	1.52818	3.34656	2.93474	2.71541	1.04437	1.49325	2.73508	0.762835	0.0478981	0.924871	1.02822	1.9398	0.917966	2.36527	1.58732	1.72056	3.59517	4.26185	1.22699	11.9548
evm.TU.Contig154.196	752	692	968	1129	1348	348	2782	1350	2792	1680	1908	1579	800	679	803	1200	1369	1159	1955	1299	1868	1767	1100	1486	21.7224	18.247	25.4902	27.8507	28.1775	10.402	65.3703	34.997	68.0675	43.6776	48.7618	38.7741	19.6604	17.8118	21.4073	30.716	34.6283	29.134	51.6834	34.2199	48.895	45.7786	28.2143	39.943	736.037
evm.TU.Contig969.42	355	471	415	533	635	462	473	482	414	389	520	505	409	412	378	535	524	479	408	517	402	399	400	404	13.1665	15.9462	14.0313	16.8818	17.0427	17.7308	14.2704	16.0433	12.9591	12.9852	17.063	15.9222	12.9055	13.8767	12.9387	17.5828	17.0181	15.4597	13.8489	17.4868	13.5103	13.2724	13.1731	13.9429	386.257
evm.TU.Contig67.31	2	0	4	14	18	6	7	5	2	6	9	3	1	0	0	6	0	4	0	3	1	2	3	2	0.167555	0	0.305488	1.00163	1.09124	0.520143	0.477043	0.375927	0.141413	0.452415	0.667083	0.213657	0.071275	0	0	0.445421	0	0.291616	0	0.229206	0.0759142	0.150277	0.223169	0.155915	0.305956
evm.TU.Contig67.30	5	65	23	40	49	17	22	8	12	12	48	23	10	6	6	25	22	10	12	27	15	9	6	8	0.28139	3.33923	1.17998	1.92242	1.99552	0.989992	1.00715	0.404049	0.569971	0.607825	2.38996	1.10036	0.478794	0.306645	0.311635	1.24672	1.08417	0.489737	0.618063	1.38574	0.764937	0.454272	0.29983	0.418947	7.02986
evm.TU.Contig363.10	6	1	1	4	36	3	1	2	0	1	6	5	1	2	2	2	0	7	0	4	1	4	0	0	0.160853	0.0244721	0.024439	0.0915772	0.698396	0.0832229	0.0218077	0.0481186	0	0.0241288	0.142311	0.11395	0.022808	0.0486915	0.0494838	0.0475115	0	0.163305	0	0.0977947	0.0242925	0.0961771	0	0	1.62939
evm.TU.Contig280.163	637	725	796	367	1370	251	823	578	660	558	688	563	2135	2394	1341	708	373	489	1417	927	950	899	700	1187	16.536	17.18	18.837	8.13594	25.7356	6.74232	17.3789	13.4656	14.46	13.0372	15.8012	12.4242	47.1519	56.4367	32.1274	16.2861	8.47886	11.0465	33.6647	21.9457	22.3466	20.9308	16.1352	28.673	1881
evm.TU.Contig164.25	6	6	8	4	6	12	3	8	4	1	5	5	22	36	4	34	6	6	26	33	20	2	12	7	0.211087	0.192689	0.256571	0.120177	0.152751	0.436854	0.0858547	0.252584	0.118769	0.0316643	0.155629	0.149537	0.658482	1.15016	0.129875	1.05994	0.184841	0.18369	0.837138	1.05877	0.637583	0.0631067	0.374867	0.22916	19.7229
evm.TU.Contig184.851	244	207	174	193	299	126	183	108	165	170	195	136	293	390	212	180	127	113	299	128	164	252	174	163	7.13836	5.52807	4.6405	4.82189	6.32998	3.81438	4.35504	2.83556	4.07405	4.47628	5.04724	3.38234	7.29268	10.3614	5.72402	4.66631	3.25349	2.87682	8.00559	3.41505	4.34759	6.61217	4.52006	4.43739	287.473
evm.TU.Contig249.30	0	0	0	0	1	0	0	0	0	0	2	1	0	0	0	2	1	4	0	0	0	0	0	3	0	0	0	0	0.022875	0	0	0	0	0	0.0559346	0.0268725	0	0	0	0.0560224	0.0276807	0.110033	0	0	0	0	0	0.0882453	NA
evm.TU.Contig44.177	1	2	0	3	0	0	2	2	0	0	1	7	0	0	0	1	1	1	0	0	0	0	0	0	0.0338702	0.0618361	0	0.086774	0	0	0.0551036	0.060793	0	0	0.029966	0.201551	0	0	0	0.030013	0.0296589	0.0294742	0	0	0	0	0	0	0
evm.TU.Contig577.15	452	472	435	444	784	319	447	353	444	487	495	436	548	453	458	417	371	481	402	435	348	475	436	402	14.2882	13.62	12.5353	11.986	17.934	10.4346	11.4942	10.0143	11.8456	13.8557	13.8438	11.7164	14.7377	13.0042	13.3617	11.6807	10.2695	13.2315	11.63	12.5403	9.96816	13.4669	12.238	11.8249	469.114
evm.TU.Contig171.111	49	52	53	55	119	91	89	47	56	36	75	90	61	41	19	114	111	83	48	40	53	68	62	50	7.632	7.39333	7.52532	7.3157	13.4126	14.6666	11.2763	6.56971	7.36146	5.04666	10.3351	11.9166	8.08319	5.79926	2.73119	15.734	15.1392	11.2498	6.84222	5.68173	7.48022	9.49918	8.57471	7.24675	38.3482
evm.TU.Contig39.234	754	829	799	771	1054	672	799	581	654	716	906	793	784	767	680	754	625	787	678	634	608	675	747	575	22.9702	23.0538	22.1895	20.0585	23.2358	21.184	19.8004	15.8846	16.8153	19.6321	24.4193	20.537	20.3199	21.2195	19.1187	20.3544	16.6729	20.8638	18.9033	17.6142	16.7839	18.443	20.2069	16.3002	717.963
evm.TU.Contig245.15	498	596	661	716	1056	433	751	761	605	430	654	513	859	922	630	844	441	603	816	870	823	458	510	707	23.7892	25.989	28.7845	29.2088	36.5036	21.4034	29.1825	32.6243	24.3915	18.4875	27.64	20.8322	34.9103	39.997	27.7745	35.726	18.447	25.0664	35.6741	37.9007	35.6243	19.6223	21.6324	31.4268	774.096
evm.TU.Contig464.54	1023	1204	1307	877	1814	620	1213	1121	1241	911	1149	908	1677	1644	1525	1075	796	785	1577	1658	1332	1519	1048	1381	31.4249	33.7613	36.6	23.0064	40.3235	19.7076	30.3104	30.9037	32.1739	25.1869	31.2269	23.7112	43.827	45.8613	43.2339	29.2617	21.4116	20.9842	44.3346	46.4474	37.0765	41.8496	28.5855	39.4751	1560.68
evm.TU.Contig12.185	313	378	387	247	268	140	502	361	581	354	301	221	151	200	143	149	231	355	285	408	183	318	227	179	11.3798	12.5451	12.8265	7.66897	7.05093	5.26698	14.8465	11.7788	17.8278	11.5838	9.68203	6.83047	4.67064	6.60337	4.79823	4.80029	7.35425	11.2316	9.48303	13.5278	6.02888	10.3693	7.32826	6.05582	159.252
[truncated: 28 more columns]
