# Supplementary material for: Physiological and Transcriptomic Responses of Growth in Neolamarckia cadamba Stimulated by Exogenous Gibberellins
Source: Int J Mol Sci. 2022 Oct 6;23(19):11842. doi: 10.3390/ijms231911842 (PMC9569647; doi:10.3390/ijms231911842)
Supplement: Supplementary file 1 [file ijms-23-11842-s001.zip › Supplemental Table S10.xlsx]

## Sheet: Sheet1
Supplemental Table S2. The data of qRT-PCR primers
GENE ID	Left Primer	Tm	Right Primer	Tm
evm.TU.Contig421.375	GTATTCGATCGCCTGGCAGA	60	GACGCCCTCTTCCACATGAA	60
evm.TU.Contig96.466	GGTGGTCCATCAGTCCCAAC	60.3	CGCTCTGTGCAAGCAACTTT	60
evm.TU.Contig184.687	GGCTCCATTGTACAGGGCTT	60	CCGGAGACGCTTCCTTTCTT	60
evm.TU.Contig180.295	TTACAGGCTCTTCTGGCACG	60	TCCTGGCGCCGTAAATATCC	60
evm.TU.Contig553.11	AACCCGGTCATTCGTCTTCC	60	CCTCCACCTGGTCCATTACG	59.8
evm.TU.Contig331.40	GGTTTGGTTCGGCTGGTTTC	60	CTGAGTTTCCAAGCGGAGGT	60
evm.TU.Contig210.8	TTCCTCATTCCCAGAACGGC	60	TAACGACAGTCGCGAACACA	60
evm.TU.Contig421.511	GCCTAGCATTTGGGACACCT	60	AACCCCTTTGGGTTGACTGG	60.1
evm.TU.Contig421.510	GTTCCCGGGTCAGGTCATTT	60	CGATCTGTCCGCTGACCATT	60.2
evm.TU.Contig383.196	GCAGAGCTTGAGGGAGTTGT	60	TCTGCAGCGTTCAAGGTCAT	60
evm.TU.Contig66.420	AGAAAACCTGCTGCCGAAGA	59.9	GCAACATAGCCATCAGGGGT	60.1
evm.TU.Contig154.647	TTTCACGGCCTGGGTAACTC	60	CTTGGCTGCTGAGAGGAACA	60
evm.TU.Contig101.17	TCCGGAGCTCAGGTACTTCA	60	GGCAGAGGGTCCCATGAAAA	60
evm.TU.Contig477.432	ATGGCTATTCGTCTGCCTCG	60	CCGCTAAACAGCCTCTTGGA	60
evm.TU.Contig477.431）	ACCTGAACCAGCCCTCATTT	59.2	TTCTGCTCAAGCGAGAGGTG	60
