# Supplementary material for: Physiological and Transcriptomic Responses of Growth in Neolamarckia cadamba Stimulated by Exogenous Gibberellins
Source: Int J Mol Sci. 2022 Oct 6;23(19):11842. doi: 10.3390/ijms231911842 (PMC9569647; doi:10.3390/ijms231911842)
Supplement: Supplementary file 1 [file ijms-23-11842-s001.zip › Supplemental Table S11.xlsx]

## Sheet: PIF
gene_id	CK14d_1_count	CK14d_2_count	CK14d_3_count	CK1d_1_count	CK1d_2_count	CK1d_3_count	CK3d_1_count	CK3d_2_count	CK3d_3_count	CK7d_1_count	CK7d_2_count	CK7d_3_count	GA14d_1_count	GA14d_2_count	GA14d_3_count	GA1d_1_count	GA1d_2_count	GA1d_3_count	GA3d_1_count	GA3d_2_count	GA3d_3_count	GA7d_1_count	GA7d_2_count	GA7d_3_count	CK14d_1_fpkm	CK14d_2_fpkm	CK14d_3_fpkm	CK1d_1_fpkm	CK1d_2_fpkm	CK1d_3_fpkm	CK3d_1_fpkm	CK3d_2_fpkm	CK3d_3_fpkm	CK7d_1_fpkm	CK7d_2_fpkm	CK7d_3_fpkm	GA14d_1_fpkm	GA14d_2_fpkm	GA14d_3_fpkm	GA1d_1_fpkm	GA1d_2_fpkm	GA1d_3_fpkm	GA3d_1_fpkm	GA3d_2_fpkm	GA3d_3_fpkm	GA7d_1_fpkm	GA7d_2_fpkm	GA7d_3_fpkm	GA14dvsCK14d_GA14d
evm.TU.Contig197.32	1103	1190	1358	2029	1859	1414	818	1037	881	1533	1333	1027	702	585	1044	436	522	586	591	1326	746	1304	1142	791	29.6299	29.1807	33.2554	46.5466	36.1374	39.3051	17.8748	25	19.974	37.0643	31.6808	23.4528	16.0436	14.2711	25.8828	10.3785	12.279	13.6986	14.5297	32.4846	18.1589	31.4172	27.24	19.7725	757.227
evm.TU.Contig562.2	775	888	1325	1334	1381	1222	562	749	721	1246	1212	1337	581	510	1396	679	858	1370	755	683	583	1441	1757	1232	20.301	21.2336	31.6402	29.8417	26.1778	33.1232	11.9753	17.6078	15.9399	29.3761	28.0886	29.7726	12.948	12.132	33.7488	15.7608	19.6807	31.2293	18.0999	16.3161	13.8383	33.8544	40.8671	30.0302	815.089
evm.TU.Contig437.229	639	729	874	1475	1197	801	1118	807	937	1426	812	828	746	959	1178	885	844	1287	957	1156	875	768	662	637	16.9731	17.6759	21.163	33.4582	23.0078	22.0159	24.1565	19.2371	21.0055	34.0909	19.0821	18.6964	16.8581	23.1326	28.8776	20.8303	19.6309	29.7484	23.264	28.0024	21.0603	18.296	15.6136	15.7445	936.947
evm.TU.Contig341.228	349	393	413	454	610	490	410	253	445	343	397	478	682	592	752	579	362	540	756	529	540	592	752	826	13.4009	13.7751	14.4566	14.8873	16.9496	19.4692	12.8063	8.71836	14.4212	11.8539	13.4868	15.6029	22.2794	20.6432	26.6491	19.7006	12.1718	18.0438	26.567	18.5243	18.7888	20.3875	25.6396	29.5134	654.548
evm.TU.Contig987.42	289	278	382	254	231	269	195	200	242	362	323	403	286	297	257	197	296	325	163	166	138	190	245	167	6.01872	5.285	7.25231	4.51742	3.48129	5.797	3.30349	3.73803	4.25358	6.78537	5.9514	7.13477	5.06737	5.61706	4.93964	3.6355	5.39803	5.88999	3.10676	3.15277	2.60424	3.54891	4.53062	3.23634	270.496
evm.TU.Contig421.169	179	173	207	253	193	50	185	122	137	151	155	102	82	74	85	71	80	53	84	69	61	55	69	63	7.4417	6.56538	7.84506	8.98236	5.80629	2.15097	6.25638	4.55182	4.80699	5.65008	5.70114	3.60486	2.9003	2.79381	3.26133	2.61559	2.91237	1.91743	3.19604	2.61605	2.29797	2.05077	2.54715	2.4372	77.7782
evm.TU.Contig147.26	59	186	63	162	175	102	98	34	117	191	45	171	7	2	142	33	121	174	66	90	52	76	188	40	2.1138	6.08301	2.05759	4.95652	4.53703	3.78143	2.85607	1.09319	3.53778	6.1589	1.42638	5.20806	0.213363	0.065071	4.69522	1.04765	3.79607	5.42482	2.16405	2.94057	1.68815	2.44208	5.98073	1.33353	50.8459
[truncated: 28 more columns]

## Sheet: TCP
gene_id	CK14d_1_count	CK14d_2_count	CK14d_3_count	CK1d_1_count	CK1d_2_count	CK1d_3_count	CK3d_1_count	CK3d_2_count	CK3d_3_count	CK7d_1_count	CK7d_2_count	CK7d_3_count	GA14d_1_count	GA14d_2_count	GA14d_3_count	GA1d_1_count	GA1d_2_count	GA1d_3_count	GA3d_1_count	GA3d_2_count	GA3d_3_count	GA7d_1_count	GA7d_2_count	GA7d_3_count	CK14d_1_fpkm	CK14d_2_fpkm	CK14d_3_fpkm	CK1d_1_fpkm	CK1d_2_fpkm	CK1d_3_fpkm	CK3d_1_fpkm	CK3d_2_fpkm	CK3d_3_fpkm	CK7d_1_fpkm	CK7d_2_fpkm	CK7d_3_fpkm	GA14d_1_fpkm	GA14d_2_fpkm	GA14d_3_fpkm	GA1d_1_fpkm	GA1d_2_fpkm	GA1d_3_fpkm	GA3d_1_fpkm	GA3d_2_fpkm	GA3d_3_fpkm	GA7d_1_fpkm	GA7d_2_fpkm	GA7d_3_fpkm	GA14dvsCK14d_GA14d
evm.TU.Contig16.294	971	1135	1562	1878	2095	1490	1883	1432	1384	1286	1373	1473	1133	1346	1043	1315	1162	1336	1236	1572	1318	1495	1154	1494	40.597	43.3177	59.5337	67.0535	63.3843	64.4623	64.041	53.7309	48.8365	48.3922	50.7874	52.3536	40.301	51.1054	40.2453	48.7184	42.5421	48.6079	47.2941	59.9385	49.9329	56.0597	42.8417	58.1241	1134.77
evm.TU.Contig28.28	916	1178	735	572	976	483	1150	649	1418	935	904	1350	1436	895	1437	742	898	793	1378	1162	995	965	1531	1111	34.8899	40.9585	25.521	18.6059	26.9015	19.0369	35.6315	22.1848	45.5841	32.0534	30.4637	43.7126	46.5338	30.958	50.5146	25.0438	29.9514	26.2846	48.0359	40.3635	34.3418	32.966	51.7803	39.3776	1215.02
evm.TU.Contig40.24	985	1156	852	534	1055	589	1126	668	1139	958	1081	1231	1258	764	1168	762	804	925	1037	946	758	1058	1285	968	42.6608	45.7031	33.6387	19.7508	33.065	26.3969	39.6702	25.9643	41.6342	37.3437	41.4219	45.3232	46.3537	30.0492	46.6866	29.2442	30.492	34.8626	41.1041	37.3648	29.7481	41.0973	49.4176	39.0121	1027.17
evm.TU.Contig60.239	830	776	727	1187	983	394	1002	653	752	1039	771	1053	844	735	1100	697	859	1099	616	953	794	943	1049	776	37.2611	31.8005	29.7522	45.5071	31.934	18.3028	36.5913	26.3086	28.4924	41.9809	30.6226	40.186	32.2352	29.9648	45.575	27.727	33.7682	42.9339	25.3088	39.0166	32.2994	37.9686	41.8156	32.4168	868.117
evm.TU.Contig61.87	441	688	469	415	492	258	610	453	690	672	399	713	525	291	1014	449	662	595	824	1478	559	792	1052	742	11.0964	15.8025	10.7578	8.91745	8.95837	6.71748	12.4855	10.2293	14.6529	15.2184	8.8823	15.2511	11.2386	6.64938	23.547	10.0111	14.586	13.0282	18.975	33.9152	12.7453	17.8732	23.5041	17.3731	597.875
evm.TU.Contig184.399	309	363	238	384	412	250	489	446	657	496	338	467	319	174	452	529	415	452	666	634	603	496	693	451	10.1599	10.8951	7.1337	10.7823	9.8028	8.50581	13.0789	13.1605	18.2318	14.6782	9.83237	13.0532	8.92344	5.19549	13.7159	15.4127	11.9486	12.9329	20.0409	19.0107	17.9657	14.6267	20.2325	13.7987	306.824
evm.TU.Contig694.70	403	433	423	604	665	255	487	400	363	670	448	447	469	302	492	311	429	386	498	397	404	411	436	400	12.6669	12.4236	12.1202	16.2126	15.1254	8.29371	12.4516	11.2831	9.6295	18.9539	12.4581	11.9437	12.5414	8.6202	14.272	8.66196	11.8075	10.5579	14.3254	11.3798	11.5064	11.5862	12.1685	11.6992	407.634
evm.TU.Contig184.45	322	240	269	338	481	178	260	204	263	216	389	339	499	522	382	321	210	221	456	400	246	289	342	210	9.64135	6.55976	7.34246	8.64271	10.422	5.51502	6.33269	5.48174	6.64617	5.82096	10.3049	8.62881	12.7114	14.1938	10.5561	8.51686	5.50603	5.75837	12.4957	10.9225	6.67442	7.76095	9.09272	5.85103	450.708
evm.TU.Contig130.69	227	291	308	241	330	159	282	397	345	406	216	354	277	98	449	179	332	381	304	496	264	360	431	283	21.8287	25.5441	26.9998	19.7911	22.9636	15.8214	22.0589	34.261	27.9998	35.1389	18.3767	28.9384	22.6617	8.55807	39.8479	15.2528	27.9562	31.8825	26.7541	43.4974	23.004	31.0485	36.8015	25.3233	268.389
evm.TU.Contig383.133	331	376	142	130	159	116	141	54	233	446	154	371	495	212	583	276	239	160	224	134	174	338	633	299	7.16321	7.42783	2.8014	2.40256	2.49	2.59766	2.48217	1.04877	4.25568	8.68708	2.94857	6.82531	9.11372	4.16641	11.6441	5.29275	4.52913	3.01318	4.43651	2.64462	3.41213	6.56042	12.1638	6.02118	417.291
evm.TU.Contig215.35	464	358	301	351	294	128	224	215	188	278	196	198	244	216	238	213	148	267	202	170	149	117	141	100	21.8039	15.3566	12.8941	14.0856	9.9974	6.22403	8.56245	9.06697	7.45605	11.7577	8.14862	7.90954	9.75479	9.2176	10.3217	8.8693	6.08999	10.9183	8.68724	7.28526	6.34453	4.93103	5.88331	4.37268	225.03
evm.TU.Contig130.70	161	211	142	167	310	77	231	179	186	216	186	332	153	48	231	223	221	376	181	311	118	333	386	166	25.0766	29.9999	20.1622	22.2131	34.9403	12.4102	29.2676	25.0208	24.4506	30.2799	25.631	43.9592	20.2742	6.78938	33.2055	30.7779	30.142	50.963	25.8009	44.1755	16.6541	46.518	53.3845	24.0592	140.507
evm.TU.Contig360.60	279	251	205	166	282	126	157	78	107	185	286	298	196	158	148	105	112	220	107	163	148	216	240	94	8.6183	7.0776	5.77269	4.37902	6.30361	4.02748	3.94503	2.16231	2.78956	5.14338	7.81618	7.82533	5.15092	4.43222	4.21925	2.87408	3.02951	5.91378	3.02493	4.59181	4.14263	5.9842	6.58286	2.70194	161.134
evm.TU.Contig154.352	109	142	203	125	202	95	128	75	108	73	163	190	240	285	147	122	88	115	176	145	122	113	206	218	2.48534	2.95557	4.21951	2.434	3.33298	2.24144	2.37411	1.53471	2.07834	1.4981	3.28819	3.68283	4.65566	5.90134	3.09337	2.46497	1.75703	2.28182	3.6727	3.01513	2.52066	2.31085	4.17073	4.62537	215.315
evm.TU.Contig66.43	120	142	89	162	213	193	131	76	136	133	156	184	131	123	142	170	116	121	176	153	150	148	202	89	13.7516	14.8544	9.29759	15.854	17.6634	22.8863	12.2117	7.81616	13.1536	13.7178	15.8164	17.925	12.7719	12.8004	15.0182	17.2629	11.6404	12.0666	18.4586	15.9898	15.5762	15.2114	20.5547	9.49061	127.902
evm.TU.Contig477.16	177	161	109	93	194	40	132	108	148	107	92	86	135	69	86	180	166	122	169	119	215	76	61	106	4.94911	4.10936	2.77835	2.22069	3.92535	1.15733	3.00235	2.71009	3.49261	2.69276	2.2759	2.04419	3.21143	1.75206	2.21926	4.45984	4.06443	2.96851	4.32468	3.03445	5.4474	1.90591	1.5145	2.75798	92.7159
evm.TU.Contig66.1267	53	52	51	154	162	151	86	68	49	68	199	113	68	121	198	83	66	58	68	113	73	54	97	62	1.4782	1.3239	1.29669	3.668	3.2696	4.35792	1.95114	1.70205	1.15342	1.70697	4.91045	2.6792	1.61353	3.06471	5.09658	2.05129	1.6119	1.4077	1.73572	2.87418	1.84492	1.35078	2.40223	1.60909	126.932
evm.TU.Contig66.42	54	51	77	154	158	96	103	75	107	68	96	91	55	96	34	149	64	102	86	137	121	76	73	93	15.5108	13.3723	20.1622	37.7756	32.8412	28.5336	24.0663	19.3334	25.9392	17.5796	24.3962	22.2203	13.4404	25.0414	9.01312	37.9244	16.0975	25.4956	22.6075	35.8872	31.4935	19.5789	18.6187	24.8573	59.3695
evm.TU.Contig480.487	105	97	72	64	109	26	142	63	164	69	78	89	63	32	87	98	84	83	85	65	72	80	95	57	5.07054	4.27594	3.1696	2.63934	3.80903	1.29922	5.5781	2.73031	6.68409	2.99898	3.3325	3.65363	2.58831	1.40334	3.8774	4.19357	3.55207	3.48793	3.75662	2.86258	3.15061	3.4649	4.07356	2.56136	59.0641
evm.TU.Contig256.175	71	47	98	51	95	2	105	158	131	51	32	34	46	29	32	33	37	43	232	107	208	33	51	46	1.72563	1.04275	2.17131	1.05855	1.67084	0.0502995	2.07592	3.4463	2.68716	1.11563	0.688098	0.702485	0.951169	0.64008	0.717787	0.710715	0.78746	0.909458	5.16049	2.37166	4.58088	0.719346	1.10064	1.04035	34.2791
evm.TU.Contig66.1617	102	54	60	102	122	133	93	41	49	133	114	85	52	74	43	62	46	78	27	79	34	50	74	44	7.0279	3.39636	3.76863	6.00173	6.08286	9.48248	5.21244	2.53522	2.84941	8.24776	6.9493	4.97867	3.04817	4.63025	2.73433	3.78538	2.77537	4.67676	1.70256	4.964	2.12276	3.0898	4.52734	2.82104	54.3853
evm.TU.Contig7.12	94	120	81	85	68	39	69	45	37	86	72	84	75	68	95	29	31	51	53	81	67	65	97	42	2.74156	3.19482	2.15359	2.11709	1.43516	1.17701	1.63701	1.17785	0.910764	2.2575	1.85786	2.08266	1.86098	1.80105	2.55712	0.749481	0.791716	1.29439	1.41468	2.15444	1.77069	1.70027	2.51205	1.13986	77.0812
evm.TU.Contig471.79	47	56	37	25	86	51	16	18	19	15	60	45	27	62	49	64	26	59	87	38	39	56	37	54	2.61183	2.84073	1.87437	1.18642	3.45835	2.93267	0.72327	0.89769	0.891117	0.750236	2.94992	2.12583	1.2765	3.12886	2.51304	3.15152	1.2652	2.85315	4.42466	1.92579	1.96385	2.79107	1.82572	2.79237	44.8876
evm.TU.Contig16.383	18	28	45	31	30	9	32	35	19	23	43	18	30	144	56	10	17	14	24	29	24	17	5	8	0.519952	0.738318	1.18498	0.764722	0.627097	0.269016	0.751923	0.90733	0.46321	0.597968	1.09893	0.44201	0.737264	3.77746	1.49292	0.255967	0.430009	0.35192	0.634476	0.763955	0.628201	0.440428	0.128247	0.215036	74.6837
evm.TU.Contig96.474	39	30	29	28	63	12	13	27	23	18	38	29	12	7	8	38	14	27	19	21	14	26	21	20	1.19415	0.838511	0.809465	0.732153	1.39591	0.380206	0.323794	0.74193	0.594367	0.496049	1.02941	0.754849	0.312597	0.194643	0.226068	1.03102	0.375369	0.719419	0.532427	0.586396	0.388434	0.714005	0.57095	0.569841	8.64193
evm.TU.Contig565.9	7	14	9	10	20	0	20	11	29	19	4	22	24	14	41	17	26	17	41	10	22	15	26	28	0.261521	0.477454	0.30652	0.319051	0.540706	0	0.607815	0.368814	0.914409	0.638883	0.132215	0.698716	0.762835	0.474989	1.41367	0.562795	0.850589	0.552692	1.40186	0.340712	0.74478	0.502615	0.862518	0.973415	25.7447
evm.TU.Contig180.15	19	26	26	11	41	3	10	20	11	14	16	13	44	30	24	12	3	9	11	30	13	11	23	19	0.587183	0.733479	0.732487	0.290311	0.916909	0.0959369	0.251393	0.554697	0.28691	0.38941	0.437472	0.341533	1.15687	0.841953	0.684522	0.32862	0.0811855	0.24204	0.311119	0.845512	0.364049	0.304893	0.631151	0.546392	31.283
evm.TU.Contig45.36	1	8	1	20	6	0	3	5	1	1	9	1	23	63	103	19	0	14	40	17	1	1	14	19	0.0477007	0.348345	0.0434842	0.814715	0.207109	0	0.116407	0.214043	0.0402586	0.0429323	0.37982	0.0405503	0.93339	2.72905	4.53438	0.803102	0	0.581136	1.74622	0.739524	0.0432236	0.0427819	0.592978	0.843353	62.2625
evm.TU.Contig21.549	3	0	3	20	62	2	7	9	0	0	20	1	14	9	11	5	1	14	7	40	2	0	8	4	0.110219	0	0.100476	0.627502	1.64835	0.0760342	0.209201	0.296745	0	0	0.650092	0.0312322	0.437596	0.300278	0.372978	0.162778	0.0321715	0.447597	0.235367	1.34021	0.0665826	0	0.260982	0.136749	10.9157
evm.TU.Contig66.401	14	5	2	9	26	7	0	1	0	2	14	6	4	6	1	2	1	3	1	10	0	0	5	2	0.804263	0.262201	0.104739	0.441533	1.08085	0.416114	0	0.0515556	0	0.103409	0.711555	0.293015	0.195497	0.313017	0.0530183	0.10181	0.0503046	0.149974	0.0525755	0.5239	0	0	0.25505	0.106913	3.50195
evm.TU.Contig131.1	5	0	1	8	11	0	0	1	2	1	0	0	2	0	1	1	0	0	0	0	2	0	2	1	0.187011	0	0.0340961	0.255528	0.297724	0	0	0.0335664	0.0631338	0.0336633	0	0	0.0636413	0	0.0345187	0.0331429	0	0	0	0	0.0677836	0	0.0664223	0.034804	0.950347
evm.TU.Contig63.469	2	3	0	0	0	0	1	4	1	0	0	2	0	0	0	3	0	0	1	1	7	0	0	0	0.126625	0.173383	0	0	0	0	0.0515019	0.227278	0.0534348	0	0	0.107644	0	0	0	0.168308	0	0	0.0579434	0.057739	0.401592	0	0	0	0
[truncated: 28 more columns]

## Sheet: BZR1
gene_id	CK14d_1_count	CK14d_2_count	CK14d_3_count	CK1d_1_count	CK1d_2_count	CK1d_3_count	CK3d_1_count	CK3d_2_count	CK3d_3_count	CK7d_1_count	CK7d_2_count	CK7d_3_count	GA14d_1_count	GA14d_2_count	GA14d_3_count	GA1d_1_count	GA1d_2_count	GA1d_3_count	GA3d_1_count	GA3d_2_count	GA3d_3_count	GA7d_1_count	GA7d_2_count	GA7d_3_count	CK14d_1_fpkm	CK14d_2_fpkm	CK14d_3_fpkm	CK1d_1_fpkm	CK1d_2_fpkm	CK1d_3_fpkm	CK3d_1_fpkm	CK3d_2_fpkm	CK3d_3_fpkm	CK7d_1_fpkm	CK7d_2_fpkm	CK7d_3_fpkm	GA14d_1_fpkm	GA14d_2_fpkm	GA14d_3_fpkm	GA1d_1_fpkm	GA1d_2_fpkm	GA1d_3_fpkm	GA3d_1_fpkm	GA3d_2_fpkm	GA3d_3_fpkm	GA7d_1_fpkm	GA7d_2_fpkm	GA7d_3_fpkm	GA14dvsCK14d_GA14d
evm.TU.Contig45.360	1608	1621	1744	3074	2987	1567	2991	2351	2722	1725	1461	1750	1750	1904	1596	2222	2619	2507	3212	3637	2703	1787	1422	1462	61.5303	56.6214	60.8354	100.452	82.7105	62.0464	93.1005	80.735	87.9072	59.4088	49.4611	56.9259	56.9707	66.1632	56.3627	75.3424	87.7558	83.48	112.484	126.918	93.7228	61.3285	48.3157	52.0572	1691.09
evm.TU.Contig394.192	2030	2480	1928	1966	1857	1229	3753	3035	4131	2871	1498	2012	967	670	991	1668	3555	2958	2420	3269	2221	1999	1488	1301	57.5615	64.1922	49.8368	47.607	38.104	36.0606	86.566	77.2327	98.861	73.2703	37.5802	48.499	23.3278	17.2527	25.9338	41.9107	88.27	72.9893	62.8007	84.5337	57.0665	50.8375	37.4649	34.3277	847.847
evm.TU.Contig477.88	914	872	861	1281	1501	1533	1021	881	872	1008	1236	1016	945	1014	987	904	835	1067	957	951	851	1124	1119	963	23.895	20.81	20.5197	28.5996	28.3964	41.4713	21.7129	20.6701	19.2402	23.7181	28.5884	22.58	21.0186	24.0738	23.8141	20.9421	19.1154	24.2745	22.8974	22.6735	20.1598	26.3549	25.9762	23.427	950.972
evm.TU.Contig14.98	681	759	732	562	799	601	628	616	789	644	607	781	911	847	1168	808	866	949	1055	970	788	937	926	777	25.5141	25.9579	25.0007	17.9813	21.6622	23.2998	19.1393	20.7119	24.9485	21.7159	20.1202	24.8744	29.0377	28.818	40.3861	26.8248	28.4111	30.9403	36.1742	33.1424	26.752	31.4853	30.8056	27.0885	947.838
evm.TU.Contig555.304	605	718	605	716	718	655	769	528	693	724	633	931	675	571	752	666	875	774	636	610	602	872	683	684	20.9952	22.7448	19.1393	21.2191	18.0306	23.5207	21.7082	16.4439	20.297	22.6132	19.4347	27.4652	19.9287	17.9948	24.0845	20.48	26.5895	23.3738	20.1992	19.3051	18.9303	27.1403	21.046	22.0877	645.617
evm.TU.Contig215.29	489	512	488	716	617	780	513	480	466	582	540	561	428	563	494	687	632	702	477	606	560	523	519	455	23.4267	22.3906	21.3122	29.2931	21.3899	38.6671	19.9918	20.6371	18.8418	25.0948	22.8879	22.8473	17.4444	24.4939	21.8416	29.1643	26.5129	29.2661	20.9138	26.4761	24.3101	22.4718	22.0778	20.2836	480.144
evm.TU.Contig480.533	466	504	538	332	911	184	1034	505	747	409	552	546	470	193	143	553	526	641	731	588	427	650	390	418	20.2886	20.0305	21.3529	12.344	28.7017	8.28952	36.6201	19.7317	27.4487	16.0269	21.2626	20.2082	17.4091	7.63082	5.74592	21.3346	20.0535	24.2857	29.1271	23.3466	16.8458	25.3814	15.0771	16.9346	254.589
evm.TU.Contig434.57	493	543	791	633	932	482	389	338	347	473	545	527	455	614	474	591	487	591	363	482	414	479	430	386	16.9665	17.0584	24.8158	18.6037	23.2104	17.1647	10.89	10.4392	10.0788	14.6509	16.594	15.4179	13.3219	19.1893	15.055	18.0229	14.6761	17.6994	11.4331	15.1276	12.9105	14.7848	13.1401	12.3613	498.123
evm.TU.Contig208.38	124	106	141	76	152	45	220	122	231	135	145	173	149	114	202	178	128	140	290	180	169	165	178	173	4.1015	3.20053	4.25155	2.14677	3.6382	1.5402	5.91938	3.62149	6.44862	4.01896	4.24326	4.86448	4.19293	3.42431	6.16636	5.21715	3.70739	4.02971	8.77874	5.42965	5.06529	4.89486	5.22789	5.32474	150.805
evm.TU.Contig76.8	3	1	3	5	10	1	8	3	5	3	3	1	1	3	2	2	3	3	3	4	3	4	3	1	0.20066	0.0610569	0.182923	0.285602	0.484019	0.0692126	0.435274	0.180081	0.282256	0.180601	0.17753	0.0568603	0.0569051	0.182225	0.12346	0.118539	0.175711	0.174617	0.183643	0.243994	0.181827	0.239958	0.178175	0.0622402	1.95267
evm.TU.Contig54.455	0	0	0	1	0	2	3	1	1	4	2	4	0	4	0	0	1	0	5	9	1	0	0	1	0	0	0	0.056158	0	0.136093	0.160478	0.0590156	0.0555002	0.236744	0.116359	0.223609	0	0.238873	0	0	0.0575835	0	0.300915	0.539737	0.0595878	0	0	0.0611916	1.29313
[truncated: 28 more columns]

## Sheet: JAZ
gene_id	CK14d_1_count	CK14d_2_count	CK14d_3_count	CK1d_1_count	CK1d_2_count	CK1d_3_count	CK3d_1_count	CK3d_2_count	CK3d_3_count	CK7d_1_count	CK7d_2_count	CK7d_3_count	GA14d_1_count	GA14d_2_count	GA14d_3_count	GA1d_1_count	GA1d_2_count	GA1d_3_count	GA3d_1_count	GA3d_2_count	GA3d_3_count	GA7d_1_count	GA7d_2_count	GA7d_3_count	CK14d_1_fpkm	CK14d_2_fpkm	CK14d_3_fpkm	CK1d_1_fpkm	CK1d_2_fpkm	CK1d_3_fpkm	CK3d_1_fpkm	CK3d_2_fpkm	CK3d_3_fpkm	CK7d_1_fpkm	CK7d_2_fpkm	CK7d_3_fpkm	GA14d_1_fpkm	GA14d_2_fpkm	GA14d_3_fpkm	GA1d_1_fpkm	GA1d_2_fpkm	GA1d_3_fpkm	GA3d_1_fpkm	GA3d_2_fpkm	GA3d_3_fpkm	GA7d_1_fpkm	GA7d_2_fpkm	GA7d_3_fpkm	GA14dvsCK14d_GA14d
evm.TU.Contig184.28	58	85	109	220	224	42	296	83	162	259	136	169	4	28	27	284	193	82	45	27	109	151	28	56	2.807	3.75515	4.80892	9.0926	7.84485	2.10334	11.653	3.60495	6.61703	11.2817	5.82323	6.95297	0.164697	1.23061	1.20596	12.1794	8.17917	3.45345	1.99315	1.19167	4.7801	6.5543	1.20326	2.52193	19.4135
evm.TU.Contig154.329	21	18	34	51	30	16	117	16	18	83	46	97	0	15	12	73	32	17	10	17	37	35	19	13	1.08773	0.851079	1.60542	2.25592	1.12447	0.857566	4.92971	0.743754	0.786881	3.86937	2.108	4.27114	0	0.705571	0.573641	3.35056	1.45141	0.766261	0.474041	0.803027	1.7366	1.62594	0.87386	0.626581	8.91045
[truncated: 28 more columns]

## Sheet: MYC
gene_id	CK14d_1_count	CK14d_2_count	CK14d_3_count	CK1d_1_count	CK1d_2_count	CK1d_3_count	CK3d_1_count	CK3d_2_count	CK3d_3_count	CK7d_1_count	CK7d_2_count	CK7d_3_count	GA14d_1_count	GA14d_2_count	GA14d_3_count	GA1d_1_count	GA1d_2_count	GA1d_3_count	GA3d_1_count	GA3d_2_count	GA3d_3_count	GA7d_1_count	GA7d_2_count	GA7d_3_count	CK14d_1_fpkm	CK14d_2_fpkm	CK14d_3_fpkm	CK1d_1_fpkm	CK1d_2_fpkm	CK1d_3_fpkm	CK3d_1_fpkm	CK3d_2_fpkm	CK3d_3_fpkm	CK7d_1_fpkm	CK7d_2_fpkm	CK7d_3_fpkm	GA14d_1_fpkm	GA14d_2_fpkm	GA14d_3_fpkm	GA1d_1_fpkm	GA1d_2_fpkm	GA1d_3_fpkm	GA3d_1_fpkm	GA3d_2_fpkm	GA3d_3_fpkm	GA7d_1_fpkm	GA7d_2_fpkm	GA7d_3_fpkm	GA14dvsCK14d_GA14d
evm.TU.Contig184.722	6549	8299	9855	6216	6368	4273	11858	6051	11107	10829	10401	8727	2588	4851	3322	4474	6958	7133	6055	4038	4979	9790	3772	5025	206.039	238.339	282.643	167.008	144.978	139.108	303.473	170.848	294.921	306.636	289.508	233.405	69.2708	138.597	96.4564	124.728	191.689	195.287	174.342	115.856	141.943	276.244	105.374	147.11	3484.34
evm.TU.Contig969.4	2249	2607	2508	2223	2385	1598	2971	2113	3201	2741	2697	2889	2835	2903	2174	2704	2137	2822	3358	2401	2124	3114	2421	2378	58.6807	62.0928	59.6541	49.5331	45.0315	43.1447	63.0581	49.4779	70.4896	64.3685	62.2583	64.0799	62.9317	68.7859	52.3506	62.5179	48.8256	64.0749	80.1862	57.1316	50.2176	72.8717	56.0901	57.7362	2541.63
evm.TU.Contig154.196	752	692	968	1129	1348	348	2782	1350	2792	1680	1908	1579	800	679	803	1200	1369	1159	1955	1299	1868	1767	1100	1486	21.7224	18.247	25.4902	27.8507	28.1775	10.402	65.3703	34.997	68.0675	43.6776	48.7618	38.7741	19.6604	17.8118	21.4073	30.716	34.6283	29.134	51.6834	34.2199	48.895	45.7786	28.2143	39.943	736.037
evm.TU.Contig555.430	1431	1330	1414	922	1587	660	1630	1145	1149	1347	1079	1268	2252	2061	2256	883	976	927	1282	1348	1102	1111	1600	1330	48.7669	41.3744	43.9281	26.8329	39.1368	23.2742	45.1862	35.0185	33.0476	41.3155	32.5326	36.7345	65.2928	63.7838	70.9547	26.6648	29.1255	27.491	39.9841	41.8943	34.0301	33.9574	48.4163	42.1763	2118.81
evm.TU.Contig184.720	489	630	560	566	501	613	608	539	604	494	622	660	520	513	644	548	716	660	495	434	492	562	413	446	24.034	28.2653	25.0907	23.7567	17.8188	31.1762	24.3083	23.7746	25.0547	21.8526	27.047	27.576	21.7436	22.8972	29.2119	23.8666	30.8155	28.2285	22.2657	19.453	21.9119	24.7736	18.0241	20.3978	542.893
evm.TU.Contig462.93	258	298	373	282	299	397	297	255	287	234	406	351	740	750	588	298	271	256	502	254	415	383	441	573	32.7945	34.5774	43.2212	30.6113	27.5027	52.2176	30.7093	29.0889	30.7891	26.7705	45.6581	37.9278	80.0247	86.5744	68.9787	33.5653	30.1639	28.3169	58.3981	29.4438	47.7998	43.6632	49.7744	67.7746	667.869
evm.TU.Contig81.1072	107	115	123	139	200	85	138	160	162	133	147	185	188	109	189	169	174	214	164	149	142	164	185	161	8.98687	8.81692	9.41753	9.96989	12.1556	7.38735	9.42837	12.0601	11.4835	10.0539	10.9233	13.2089	13.4336	8.31377	14.6502	12.5778	12.7971	15.641	12.6061	11.4127	10.8071	12.3539	13.7969	12.5829	156.722
evm.TU.Contig81.562	78	97	92	43	103	37	109	56	111	72	55	127	94	49	115	140	151	132	105	130	82	85	133	106	5.12927	5.82273	5.51513	2.41479	4.9014	2.51772	5.83069	3.30488	6.16052	4.2614	3.19988	7.09959	5.25895	2.9262	6.97935	8.15795	8.69511	7.5537	6.31922	7.7962	4.8862	5.01319	7.76601	6.48631	83.5207
evm.TU.Contig154.33	3	25	12	16	15	156	23	149	1	25	61	61	11	23	40	94	21	62	55	207	126	49	144	37	0.195152	1.48452	0.711606	0.888838	0.706099	10.5008	1.21706	8.6985	0.0549016	1.4637	3.51069	3.37327	0.608773	1.35871	2.40142	5.41841	1.19621	3.50969	3.27437	12.2801	7.42709	2.85879	8.31764	2.23967	24.3384
evm.TU.Contig184.719	26	20	34	14	29	28	78	62	61	22	32	61	17	1	19	22	42	20	49	33	36	76	91	25	1.37134	0.962932	1.63477	0.630594	1.10686	1.52818	3.34656	2.93474	2.71541	1.04437	1.49325	2.73508	0.762835	0.0478981	0.924871	1.02822	1.9398	0.917966	2.36527	1.58732	1.72056	3.59517	4.26185	1.22699	11.9548
evm.TU.Contig969.5	19	43	13	2	3	4	11	10	13	14	2	7	11	40	17	10	8	12	23	17	19	8	13	19	1.04448	2.15778	0.651471	0.0938913	0.119341	0.227536	0.491892	0.493345	0.603145	0.692678	0.0972715	0.327123	0.514456	1.99688	0.862482	0.487121	0.385099	0.574052	1.15714	0.85226	0.946443	0.39443	0.634561	0.971917	22.0502
[truncated: 28 more columns]

## Sheet: BHLH
gene_id	CK14d_1_count	CK14d_2_count	CK14d_3_count	CK1d_1_count	CK1d_2_count	CK1d_3_count	CK3d_1_count	CK3d_2_count	CK3d_3_count	CK7d_1_count	CK7d_2_count	CK7d_3_count	GA14d_1_count	GA14d_2_count	GA14d_3_count	GA1d_1_count	GA1d_2_count	GA1d_3_count	GA3d_1_count	GA3d_2_count	GA3d_3_count	GA7d_1_count	GA7d_2_count	GA7d_3_count	CK14d_1_fpkm	CK14d_2_fpkm	CK14d_3_fpkm	CK1d_1_fpkm	CK1d_2_fpkm	CK1d_3_fpkm	CK3d_1_fpkm	CK3d_2_fpkm	CK3d_3_fpkm	CK7d_1_fpkm	CK7d_2_fpkm	CK7d_3_fpkm	GA14d_1_fpkm	GA14d_2_fpkm	GA14d_3_fpkm	GA1d_1_fpkm	GA1d_2_fpkm	GA1d_3_fpkm	GA3d_1_fpkm	GA3d_2_fpkm	GA3d_3_fpkm	GA7d_1_fpkm	GA7d_2_fpkm	GA7d_3_fpkm	GA14dvsCK14d_GA14d
evm.TU.Contig184.722	6549	8299	9855	6216	6368	4273	11858	6051	11107	10829	10401	8727	2588	4851	3322	4474	6958	7133	6055	4038	4979	9790	3772	5025	206.039	238.339	282.643	167.008	144.978	139.108	303.473	170.848	294.921	306.636	289.508	233.405	69.2708	138.597	96.4564	124.728	191.689	195.287	174.342	115.856	141.943	276.244	105.374	147.11	3484.34
evm.TU.Contig54.132	4249	4863	6116	5980	8224	2287	4704	4202	3673	5394	5959	5740	6461	6701	5060	5322	3783	5318	6096	3926	3798	6981	4443	5822	79.9343	83.5113	104.887	96.0724	111.957	44.5202	71.9857	70.9429	58.3178	91.3306	99.1815	91.7968	103.409	114.481	87.8523	88.7184	62.319	87.0602	104.955	67.3559	64.7437	117.787	74.2179	101.918	5855.58
evm.TU.Contig12.314	6655	6014	6669	4319	7077	2237	4659	3454	3719	4248	4648	4009	6028	6542	3404	4901	3643	3952	4364	3711	3725	3305	2976	3065	115.232	95.057	105.267	63.8646	88.6743	40.0809	65.6223	53.6729	54.3483	66.2018	71.2038	59.0108	88.7995	102.869	54.3967	75.1975	55.2361	59.5482	69.1551	58.5998	58.4452	51.3255	45.7557	49.3842	5111.25
evm.TU.Contig280.33	4110	4562	6417	3557	5044	2000	5461	3884	4916	5277	4692	4303	4761	4442	4327	5339	4399	4621	5450	3149	4053	4323	3462	4638	205.66	208.381	292.717	152	182.644	103.558	222.287	174.419	207.613	237.659	207.719	183.041	202.683	201.852	199.826	236.734	192.752	201.219	249.585	143.701	183.773	194.012	153.823	215.958	4357.08
evm.TU.Contig488.37	3954	3881	4832	5419	6172	5594	3975	4738	4285	4078	5152	3564	3224	3469	2143	3966	2507	2901	2868	3684	3770	3257	2193	2625	62.6743	56.1553	69.8211	73.3538	70.7947	91.7529	51.2534	67.3991	57.3241	58.178	72.2503	48.0241	43.4769	49.9348	31.3495	55.7055	34.7972	40.0152	41.605	53.2538	54.149	46.3026	30.8658	38.718	2833.13
evm.TU.Contig421.271	5107	4682	5165	2981	5301	1785	4716	3547	4144	5058	5428	5074	3730	3579	3262	3186	2775	3654	2817	2510	2264	3954	3203	3196	158.197	132.391	145.851	78.8579	118.826	57.2157	118.833	98.6052	108.339	141.017	148.759	133.614	98.2996	100.679	93.2551	87.4522	75.2719	98.4977	79.8606	70.9063	63.5485	109.851	88.0998	92.1234	3402.22
evm.TU.Contig301.81	2245	2663	3010	5921	2826	4639	3847	1894	3942	5563	5389	3568	2076	4303	4791	4164	3853	3338	2832	2471	3123	4011	4633	4349	16.0378	17.3658	19.6021	36.1223	14.6091	34.2925	22.3555	12.1427	23.7673	35.7683	34.0603	21.6682	12.6173	27.9157	31.5873	26.3592	24.1027	20.7511	18.5155	16.0983	20.2161	25.6991	29.3885	28.9101	3647.69
evm.TU.Contig341.324	3404	3200	4007	3071	4088	2187	3416	3754	2892	3654	3306	3454	3991	2887	3822	3605	2972	3128	2947	2336	2702	3786	3488	4645	73.5944	63.1538	78.9735	56.7003	63.957	48.927	60.0766	72.8376	52.77	71.1021	63.2366	63.4814	73.4087	56.6824	76.2609	69.0641	56.2654	58.8501	58.3107	46.0582	52.9342	73.4126	66.9603	93.4484	3447.88
evm.TU.Contig253.63	2106	2532	3299	3720	2377	1872	3881	1798	2965	4320	3976	2309	1281	2068	2051	3465	2848	2223	2063	1786	2712	2192	1857	2145	101.553	111.453	145.018	153.189	82.944	93.408	152.233	77.8089	120.668	187.489	169.625	94.6513	52.5525	90.5588	91.2757	148.057	120.257	93.282	91.0429	78.5405	118.5	94.8001	79.5117	96.248	1754.61
evm.TU.Contig969.4	2249	2607	2508	2223	2385	1598	2971	2113	3201	2741	2697	2889	2835	2903	2174	2704	2137	2822	3358	2401	2124	3114	2421	2378	58.6807	62.0928	59.6541	49.5331	45.0315	43.1447	63.0581	49.4779	70.4896	64.3685	62.2583	64.0799	62.9317	68.7859	52.3506	62.5179	48.8256	64.0749	80.1862	57.1316	50.2176	72.8717	56.0901	57.7362	2541.63
evm.TU.Contig421.318	2247	2447	2273	2561	3545	1335	3145	2184	2759	1857	2090	2202	2553	2393	1897	3151	2208	2748	3074	2441	2130	2744	2259	2450	73.5894	73.1545	67.8608	71.6264	84.0139	45.2417	83.7849	64.1906	76.2602	54.7373	60.5577	61.3054	71.1335	71.1708	57.3371	91.4436	63.3212	78.3167	92.1361	72.9053	63.2104	80.5993	65.6923	74.6637	2196.73
evm.TU.Contig394.60	1265	1701	1801	1271	2665	1072	1897	1451	2807	1527	1674	2230	2393	1668	2338	2265	1821	2387	3938	2663	1838	3236	3269	3198	79.2586	97.287	102.867	68.0068	120.83	69.5017	96.6843	81.5886	148.434	86.1101	92.7945	118.776	127.558	94.9071	135.194	125.752	99.9087	130.147	225.811	152.162	104.351	181.844	181.868	186.451	2062.65
evm.TU.Contig154.230	1643	1870	2950	1701	1203	465	3272	1175	2721	3784	2899	2808	676	1128	1154	1080	2231	2196	1669	445	1407	3157	1087	1848	29.6722	30.8282	48.567	26.2342	15.7217	8.68981	48.0683	19.0439	41.4739	61.5068	46.3203	43.1101	10.3865	18.4999	19.2342	17.2834	35.2817	34.512	27.5856	7.32911	23.0252	51.1355	17.4312	31.056	962.042
evm.TU.Contig540.48	1702	2049	1915	2819	2312	2051	1633	1290	1210	1940	1848	1876	1662	2391	1767	2097	1715	1909	1073	1437	1425	1425	1093	1133	41.0955	45.1618	42.1513	58.1274	40.3967	51.2443	32.0741	27.9532	24.6578	42.1595	39.4773	38.5068	34.1411	52.4278	39.3757	44.8669	36.2607	40.1113	23.7109	31.6425	31.1779	30.8592	23.4337	25.4563	1879.48
evm.TU.Contig264.135	1210	1204	1123	472	858	274	1037	399	1068	2079	1345	1773	3115	1258	4434	1208	862	733	1358	714	1003	3689	4528	4280	30.8909	28.0586	26.1356	10.2905	15.8509	7.23837	21.5356	9.14166	23.0118	47.7704	30.3794	38.479	67.6573	29.1657	104.471	27.3278	19.2704	16.2845	31.7292	16.6235	23.2029	84.4674	102.645	101.676	2860.36
evm.TU.Contig797.169	2156	2225	2591	2190	2324	1776	1067	956	1393	2513	2249	1998	1521	1006	1681	879	1049	1046	785	1600	568	1963	2070	1670	66.2902	62.4489	72.6231	57.5037	51.7081	56.5052	26.6869	26.3794	36.1481	69.5428	61.1788	52.2234	39.7869	28.0896	47.7007	23.9487	28.2432	27.9871	22.0894	44.8641	15.8251	54.1322	56.5141	47.7802	1359.49
evm.TU.Contig480.330	1509	1509	1658	1510	2692	1179	1885	1374	1491	1468	1636	1563	1690	1571	1751	1694	1568	1813	1412	1459	1228	1723	1821	1542	78.2224	71.4045	78.349	66.8451	100.981	63.2413	79.4851	63.9197	65.2309	68.49	75.0302	68.8763	74.5314	73.9545	83.7692	77.8122	71.1747	81.7833	66.9869	68.9725	57.6815	80.1055	83.8181	74.3802	1617.54
evm.TU.Contig180.202	2259	2158	2063	950	1728	708	2111	1655	2512	1519	1187	1224	1444	1175	884	1636	1566	1589	1690	1456	1227	1259	1120	1105	109.488	95.476	91.1496	39.3209	60.6059	35.508	83.228	71.9868	102.755	66.2621	50.8991	50.4312	59.5424	51.717	39.5418	70.2626	66.4626	67.0189	74.9633	64.3559	53.8877	54.7279	48.2006	49.8358	1120.83
evm.TU.Contig78.13	1877	1898	2110	1498	2294	848	2374	1824	2028	2063	2311	1487	1093	787	593	1208	1116	1284	1341	1633	1104	999	977	892	111.298	102.734	114.054	75.8551	98.4323	52.031	114.508	97.0628	101.49	110.098	121.236	74.9552	55.1382	42.3783	32.4513	63.4718	57.946	66.254	72.7719	88.3053	59.3181	53.1278	51.4401	49.2173	789.525
evm.TU.Contig292.71	434	557	870	3426	2234	1578	1542	1410	1635	702	899	726	379	515	802	2526	1252	2106	2641	2396	1834	1655	2433	938	20.5104	24.0289	37.481	138.268	76.3995	77.1679	59.2791	59.8012	65.2133	29.8594	37.5885	29.1669	15.2382	22.1024	34.9796	105.782	51.8115	86.61	114.226	103.264	78.5381	70.1484	102.097	41.2495	553.872
evm.TU.Contig394.247	525	901	500	796	1012	663	465	563	1495	1171	365	1110	1781	623	3614	1445	873	1353	3414	2983	1847	2531	3276	1938	17.6915	27.7157	15.3597	22.9071	24.6779	23.1188	12.7465	17.0263	42.5188	35.5158	10.882	31.7979	51.06	19.0652	112.396	43.1486	25.7607	39.6761	105.289	91.6723	56.3987	76.495	98.0248	60.7702	1969.41
evm.TU.Contig81.1170	1927	1663	1860	1020	1916	846	1203	1619	2131	1678	1790	1550	1539	1229	1190	1298	1762	1536	1042	1185	1248	1355	1204	1288	102.947	81.0993	90.5837	46.5352	74.071	46.7676	52.2792	77.6218	96.0832	80.6829	84.6046	70.3933	69.9487	59.6251	58.6724	61.4465	82.4278	71.408	50.9461	57.7334	60.4145	64.9239	57.114	64.0291	1270.92
evm.TU.Contig28.409	592	528	692	1605	1663	3524	2504	1465	1744	1670	1167	822	956	2074	606	2227	896	686	1299	3093	2372	948	435	1341	22.2551	18.1191	23.7148	51.5268	45.2399	137.084	76.5727	49.4255	55.3334	56.5045	38.814	26.2693	30.5757	70.8048	21.025	74.1856	29.4953	22.4417	44.692	106.039	80.8013	31.9632	14.5205	46.9102	1168.07
evm.TU.Contig28.228	698	830	560	639	2156	521	1647	1120	2609	649	827	1076	1409	468	1059	1584	1059	1520	3398	2778	1482	1406	1913	1569	35.8186	38.88	26.1968	28.003	80.0616	27.6653	68.7511	51.5796	112.995	29.9749	37.5465	46.9391	61.5142	21.8095	50.154	72.0279	47.5868	67.8769	159.584	130.006	68.9125	64.7103	87.1674	74.9216	940.79
evm.TU.Contig154.196	752	692	968	1129	1348	348	2782	1350	2792	1680	1908	1579	800	679	803	1200	1369	1159	1955	1299	1868	1767	1100	1486	21.7224	18.247	25.4902	27.8507	28.1775	10.402	65.3703	34.997	68.0675	43.6776	48.7618	38.7741	19.6604	17.8118	21.4073	30.716	34.6283	29.134	51.6834	34.2199	48.895	45.7786	28.2143	39.943	736.037
evm.TU.Contig149.52	1254	1703	1577	1044	1492	379	1034	927	806	2074	1278	1546	2913	2241	2975	741	1036	1154	1032	1198	894	1509	1078	892	29.7692	36.9045	34.1278	21.1652	25.6307	9.31009	19.9675	19.7495	16.1487	44.3137	26.8418	31.1996	58.833	48.3124	65.1798	15.5876	21.5361	23.8397	22.4214	25.9362	19.2311	32.1288	22.7235	19.7045	2622.57
evm.TU.Contig555.430	1431	1330	1414	922	1587	660	1630	1145	1149	1347	1079	1268	2252	2061	2256	883	976	927	1282	1348	1102	1111	1600	1330	48.7669	41.3744	43.9281	26.8329	39.1368	23.2742	45.1862	35.0185	33.0476	41.3155	32.5326	36.7345	65.2928	63.7838	70.9547	26.6648	29.1255	27.491	39.9841	41.8943	34.0301	33.9574	48.4163	42.1763	2118.81
evm.TU.Contig35.48	945	1260	1834	2230	1358	901	1229	949	1529	1626	989	1238	527	1111	891	1580	997	1368	1259	960	1262	1543	870	1810	25.5719	31.1241	45.2416	51.5332	26.5922	25.2291	27.053	23.0464	34.9199	39.6014	23.6776	28.4788	12.1326	27.3019	22.2518	37.8862	23.6246	32.2139	31.1796	23.6909	30.9448	37.4483	20.9043	45.5765	821.951
evm.TU.Contig46.28	1381	1658	1687	905	1736	616	1686	1160	1630	1409	1071	1080	1229	1176	1218	1212	985	1068	1180	975	849	1399	962	1084	36.3618	39.8502	40.4924	20.3494	33.0768	16.7833	36.1112	27.4104	36.222	33.3904	24.9489	24.1738	27.5305	28.1194	29.5975	28.2778	22.7104	24.4708	28.4346	23.4118	20.2561	33.0373	22.4912	26.559	1168.41
evm.TU.Contig66.968	1320	2138	3646	555	692	87	1937	567	833	3806	2780	1887	162	903	334	704	2495	1595	312	80	588	1291	174	458	41.3133	61.0827	104.025	14.8341	15.6727	2.8176	49.3149	15.926	22.0036	107.212	76.9789	50.2062	4.31362	25.6655	9.64759	19.5245	68.3792	43.4412	8.93684	2.28341	16.6759	36.2391	4.83561	13.3387	454.526
evm.TU.Contig44.167	1185	1246	1289	952	1511	664	967	890	874	1203	1207	1311	1368	528	1424	984	987	768	1741	1330	1333	2104	1848	1455	24.9688	23.9658	24.7593	17.1304	23.0391	14.4774	16.5744	16.8297	15.5426	22.8141	22.5008	23.4829	24.5231	10.1032	27.6914	18.3724	18.211	14.082	33.5731	25.557	25.451	39.7612	34.5754	28.5281	1071.17
evm.TU.Contig421.284	880	960	905	1044	1431	1453	1031	805	972	1050	1099	1096	1330	1254	1187	985	1142	995	1118	1188	1107	947	1055	882	25.5646	25.4578	23.9669	25.9004	30.0828	43.6783	24.3639	20.9874	23.8317	27.4539	28.2465	27.0667	32.8714	33.0826	31.8246	25.3562	29.0509	25.1538	29.7242	31.4739	29.1407	24.6741	27.2141	23.8427	1214.04
evm.TU.Contig197.32	1103	1190	1358	2029	1859	1414	818	1037	881	1533	1333	1027	702	585	1044	436	522	586	591	1326	746	1304	1142	791	29.6299	29.1807	33.2554	46.5466	36.1374	39.3051	17.8748	25	19.974	37.0643	31.6808	23.4528	16.0436	14.2711	25.8828	10.3785	12.279	13.6986	14.5297	32.4846	18.1589	31.4172	27.24	19.7725	757.227
evm.TU.Contig562.2	775	888	1325	1334	1381	1222	562	749	721	1246	1212	1337	581	510	1396	679	858	1370	755	683	583	1441	1757	1232	20.301	21.2336	31.6402	29.8417	26.1778	33.1232	11.9753	17.6078	15.9399	29.3761	28.0886	29.7726	12.948	12.132	33.7488	15.7608	19.6807	31.2293	18.0999	16.3161	13.8383	33.8544	40.8671	30.0302	815.089
evm.TU.Contig341.145	1437	2180	1976	661	1043	185	892	838	889	1376	863	1011	1358	848	1014	788	1092	1135	834	667	507	1021	735	767	46.4203	64.2839	58.1896	18.2349	24.3814	6.18398	23.4395	24.2942	24.2374	40.0063	24.6645	27.7633	37.3217	24.8768	30.2305	22.5564	30.8895	31.906	24.6565	19.6497	14.8407	29.581	21.0826	23.0557	1032.8
evm.TU.Contig184.558	701	827	782	1196	1450	785	1563	1096	1230	754	809	749	929	899	868	823	656	875	1328	1578	1109	865	902	863	45.8703	49.3985	46.6474	66.8338	68.6601	53.1531	83.1966	64.3622	67.9286	44.4063	46.8353	41.6644	51.7178	53.422	52.4191	47.7206	37.5885	49.825	79.529	94.1672	65.757	50.7651	52.409	52.5479	868.625
evm.TU.Contig860.47	442	565	589	820	1263	643	1951	888	1408	911	889	808	374	693	673	1081	914	1047	1853	1321	1095	972	854	1109	19.358	22.5882	23.5159	30.6693	40.0281	29.1404	69.5071	34.9027	52.0446	35.9101	34.447	30.0829	13.9355	27.5625	27.2026	41.9524	35.0528	39.9035	74.2725	52.7619	43.456	38.1804	33.2111	45.1962	566.229
evm.TU.Contig437.229	639	729	874	1475	1197	801	1118	807	937	1426	812	828	746	959	1178	885	844	1287	957	1156	875	768	662	637	16.9731	17.6759	21.163	33.4582	23.0078	22.0159	24.1565	19.2371	21.0055	34.0909	19.0821	18.6964	16.8581	23.1326	28.8776	20.8303	19.6309	29.7484	23.264	28.0024	21.0603	18.296	15.6136	15.7445	936.947
evm.TU.Contig480.352	1333	1532	1804	950	1036	536	1013	871	1310	828	658	656	325	453	285	1188	800	952	1598	1573	938	576	432	848	31.9302	33.4985	39.3927	19.4333	17.9578	13.2856	19.7385	18.7239	26.4836	17.851	13.9447	13.3581	6.62317	9.8541	6.30047	25.2163	16.7803	19.8442	35.0318	34.3621	20.3597	12.3746	9.18844	18.9016	342.337
evm.TU.Contig421.82	1178	1795	2172	553	1053	231	759	800	816	1083	956	1154	1045	547	807	705	954	1226	651	893	502	727	655	701	46.3596	64.4842	77.9222	18.5853	29.9878	9.407	24.2979	28.2547	27.103	38.3603	33.2861	38.6073	34.9882	19.5492	29.3106	24.5853	32.8761	41.9865	23.4471	32.0497	17.9017	25.6604	22.8887	25.671	769.676
evm.TU.Contig271.4	1638	1304	1084	820	1367	279	1135	780	1374	2257	1359	1285	241	131	188	525	1002	966	271	432	244	1484	784	515	95.8413	69.6484	57.8196	40.9735	57.8802	16.8923	54.0216	40.9581	67.8515	118.858	70.3508	63.9162	11.9968	6.96076	10.152	27.2201	51.3386	49.186	14.5118	23.0516	12.9367	77.8767	40.7325	28.0399	179.711
evm.TU.Contig555.524	630	732	491	1089	1326	285	664	383	611	756	812	1297	1767	1222	1651	630	1049	865	930	898	546	955	938	594	29.7732	31.5784	21.1531	43.9505	45.3472	13.9372	25.5262	16.2439	24.3702	32.1563	33.9509	52.1067	71.0448	52.4448	72.0092	26.3826	43.4108	35.5735	40.2236	38.7026	23.3816	40.4784	39.3617	26.1217	1494.43
evm.TU.Contig553.93	889	881	876	727	1208	564	1158	859	1084	771	832	688	795	736	565	798	656	811	710	886	620	893	855	637	26.9962	24.4214	24.25	18.8532	26.5454	17.7225	28.605	23.4099	27.782	21.0724	22.3529	17.7606	20.539	20.2967	15.8345	21.4731	17.4438	21.4312	19.732	24.5365	17.0604	24.3213	23.0543	17.9999	672.387
evm.TU.Contig60.343	343	446	461	1408	1141	1072	969	968	1159	646	643	694	349	167	559	1119	911	1272	741	1161	887	910	719	568	11.2778	13.3863	13.8178	39.5352	27.1481	36.4729	25.9171	28.5636	32.1623	19.1171	18.7048	19.3981	9.76263	4.98648	16.9628	32.6027	26.2293	36.3951	22.2978	34.813	26.4272	26.8353	20.9916	17.3784	349.952
evm.TU.Contig462.92	490	502	613	848	1195	746	786	381	724	488	791	752	1076	1163	863	922	556	690	934	898	757	731	1075	986	49.713	46.4914	56.6946	73.4718	87.7333	78.3173	64.8678	34.6901	61.9935	44.5608	71.0005	64.8576	92.8746	107.152	80.8056	82.8891	49.3954	60.9184	86.723	83.0863	69.5931	66.5161	96.843	93.0855	997.255
evm.TU.Contig66.1239	555	719	762	798	938	810	1081	826	1002	608	800	791	717	793	605	822	689	825	839	856	771	714	765	801	12.564	14.858	15.7253	15.4273	15.366	18.9743	19.9065	16.7812	19.1442	12.3879	16.0227	15.2223	13.8091	16.3026	12.64	16.4892	13.6582	16.2523	17.3825	17.6721	15.8156	14.4967	15.3774	16.8733	680.486
evm.TU.Contig296.341	685	788	1248	694	967	254	569	467	578	645	985	860	1440	1184	878	758	511	608	635	551	595	797	807	1020	21.2487	22.3132	35.2909	18.3845	21.7065	8.15304	14.3577	13.0006	15.1322	18.0078	27.0326	22.6782	38.0027	33.3534	25.1358	20.8354	13.8803	16.4123	18.0272	15.5873	16.7245	22.1735	22.228	29.4423	1120.49
evm.TU.Contig256.50	877	925	977	782	728	996	322	277	772	914	799	826	742	585	932	460	411	237	533	670	573	775	1087	1071	26.644	25.6528	27.0583	20.2888	16.0049	31.3115	7.9577	7.55241	19.7948	24.9922	21.4762	21.3328	19.1785	16.1399	26.1319	12.3837	10.934	6.26575	14.8197	18.5632	15.7743	21.1172	29.3234	30.2775	731.561
evm.TU.Contig383.86	545	607	610	654	1152	582	840	681	697	560	806	768	657	667	677	781	730	826	624	658	583	698	713	676	29.2097	29.6971	29.8036	29.9337	44.6793	32.2774	36.6221	32.7555	31.5281	27.0133	38.2188	34.9914	29.9576	32.4641	33.487	37.0915	34.2603	38.5244	30.6076	32.1615	28.3137	33.5522	33.9318	33.7139	645.763
evm.TU.Contig249.46	663	772	637	527	824	229	1007	863	592	654	893	1010	834	364	681	464	625	636	523	715	460	971	1081	574	40.846	43.4158	35.7752	27.7267	36.7355	14.5988	50.4659	47.7148	30.7816	36.2638	48.6742	52.8965	43.7132	20.365	38.7204	25.3307	33.7174	34.0972	29.4884	40.1718	25.6797	53.6525	59.1354	32.9063	603.316
evm.TU.Contig477.237	495	594	713	816	485	744	1012	465	830	1035	939	797	273	618	525	520	805	659	656	468	673	696	428	408	10.9663	12.0126	14.3996	15.4382	7.77534	17.0558	18.2376	9.24516	15.5191	20.6374	18.4048	15.0101	5.14551	12.4334	10.7342	10.2082	15.6167	12.7047	13.3006	9.45539	13.5103	13.8293	8.41947	8.41097	460.993
evm.TU.Contig54.415	600	744	852	385	1081	236	536	665	693	630	448	561	635	149	407	386	620	587	475	1288	553	612	533	536	29.0379	32.8686	37.589	15.912	37.8584	11.8187	21.1014	28.883	28.3062	27.4419	19.1824	23.0806	26.1456	6.54858	18.1788	16.5537	26.275	24.7217	21.0388	56.8472	24.2513	26.5644	22.9048	24.1385	380.194
evm.TU.Contig45.415	267	415	275	609	365	357	246	363	575	425	221	454	442	267	1285	313	337	478	1034	810	586	1412	1736	789	16.5879	23.5355	15.5747	32.3109	16.4095	22.9506	12.4322	20.2392	30.1496	23.7645	12.1474	23.9776	23.3622	15.0639	73.6784	17.2313	18.3336	25.8424	58.7915	45.8928	32.9894	78.6774	95.767	45.613	656.437
evm.TU.Contig63.559	614	538	725	674	708	427	490	403	468	390	366	325	555	792	625	833	329	335	944	944	630	687	443	787	22.238	17.787	23.9371	20.8467	18.5559	16.0029	14.4363	13.099	14.3056	12.7131	11.7278	10.0064	17.1013	26.0494	20.8912	26.734	10.4342	10.5584	31.2904	31.1801	20.6758	22.3161	14.2468	26.5236	637.367
evm.TU.Contig61.85	493	505	586	597	753	435	595	571	689	592	608	564	538	562	620	558	553	503	676	607	532	599	539	618	22.7637	21.2854	24.6661	23.5408	25.1601	20.784	22.3483	23.6612	26.8502	24.6023	24.8376	22.1382	21.1343	23.5656	26.4206	22.8308	22.3593	20.211	28.5664	25.5601	22.2589	24.806	22.0988	26.5531	556.119
evm.TU.Contig60.143_evm.TU.Contig60.144	231	333	187	227	290	643	768	335	625	475	404	912	816	342	1246	490	620	603	561	986	655	755	762	420	10.1978	13.4194	7.52561	8.55795	9.26431	29.373	27.5795	13.2722	23.2866	18.8732	15.7792	34.226	30.6474	13.7109	50.7653	19.1682	23.9675	23.1652	22.6657	39.6962	26.2018	29.8934	29.8699	17.2533	781.912
evm.TU.Contig54.134	567	669	342	430	1044	266	734	217	412	345	907	813	838	534	231	733	473	758	467	410	202	1007	663	389	69.6693	75.0376	38.3081	45.1209	92.8284	33.8209	73.3646	23.929	42.7257	38.1537	98.5999	84.9215	87.6018	59.5863	26.1955	79.8095	50.8928	81.0499	52.5156	45.9431	22.4908	110.974	72.3365	44.4773	507.202
evm.TU.Contig184.720	489	630	560	566	501	613	608	539	604	494	622	660	520	513	644	548	716	660	495	434	492	562	413	446	24.034	28.2653	25.0907	23.7567	17.8188	31.1762	24.3083	23.7746	25.0547	21.8526	27.047	27.576	21.7436	22.8972	29.2119	23.8666	30.8155	28.2285	22.2657	19.453	21.9119	24.7736	18.0241	20.3978	542.893
evm.TU.Contig985.10	624	655	701	528	1091	538	393	398	377	530	600	498	840	743	786	448	409	382	380	567	397	490	434	468	18.6083	17.8303	19.0567	13.4464	23.5434	16.6016	9.53338	10.6515	9.48848	14.2251	15.8301	12.6247	21.3114	20.1214	21.6322	11.8384	10.6803	9.91312	10.371	15.42	10.7278	13.1055	11.492	12.9867	763.212
evm.TU.Contig28.315	81	172	163	639	473	640	826	392	690	302	217	469	266	571	582	438	489	528	921	819	593	962	795	909	3.93447	7.62648	7.21765	26.5065	16.6259	32.1681	32.6373	17.0881	28.2868	13.2028	9.32549	19.3661	10.9924	25.1874	26.0904	18.8524	20.7992	22.3183	40.9425	36.2797	26.1007	41.9094	34.2889	41.0862	462.947
evm.TU.Contig341.228	349	393	413	454	610	490	410	253	445	343	397	478	682	592	752	579	362	540	756	529	540	592	752	826	13.4009	13.7751	14.4566	14.8873	16.9496	19.4692	12.8063	8.71836	14.4212	11.8539	13.4868	15.6029	22.2794	20.6432	26.6491	19.7006	12.1718	18.0438	26.567	18.5243	18.7888	20.3875	25.6396	29.5134	654.548
evm.TU.Contig66.955	1207	1239	1081	67	956	12	653	326	613	695	445	328	586	55	40	270	684	790	519	444	388	481	300	340	51.8695	48.6038	42.3484	2.45884	29.7293	0.533618	22.8271	12.5727	22.233	26.8812	16.919	11.9825	21.4246	2.14642	1.58643	10.2816	25.7394	29.5432	20.412	17.4007	15.1089	18.5389	11.4475	13.5961	210.608
evm.TU.Contig341.357	793	691	828	443	857	221	713	498	688	505	582	540	387	371	247	404	435	465	522	476	300	469	381	261	81.9578	65.1913	78.0107	39.0995	64.0944	23.6349	59.9431	46.1905	60.0121	46.9751	53.217	47.4438	34.0282	34.8207	23.5597	36.999	39.368	41.8211	49.3743	44.8645	28.0953	43.4735	34.9645	25.1008	321.936
evm.TU.Contig294.209	538	443	407	489	638	150	944	789	575	817	464	504	436	235	308	374	340	314	478	734	649	366	429	287	12.2713	9.22373	8.46271	9.52506	10.5306	3.54033	17.5151	16.1507	11.069	16.7722	9.36347	9.77255	8.46068	4.86769	6.48358	7.55914	6.79085	6.23251	9.97814	15.268	13.4137	7.48728	8.68863	6.09145	313.606
evm.TU.Contig84.542	166	116	128	822	440	266	668	358	543	196	218	210	419	663	205	761	335	345	1712	777	1138	219	127	659	5.03399	3.21112	3.53852	21.2876	9.65561	8.34701	16.4783	9.74303	13.8975	5.34958	5.84887	5.41368	10.8101	18.2585	5.73739	20.4494	8.89584	9.10435	47.514	21.4884	31.2711	5.9564	3.41975	18.5961	411.911
evm.TU.Contig539.32	356	478	480	713	723	229	711	419	245	750	547	677	517	445	590	374	503	652	134	280	235	381	345	180	32.5361	39.8784	39.9911	55.6488	47.8163	21.6569	52.8588	34.3665	18.898	61.693	44.2296	52.5985	40.1991	36.9336	49.7649	30.2886	40.2551	51.8547	11.2081	23.3374	19.4616	31.2302	27.9976	15.308	501.716
evm.TU.Contig154.637	352	441	367	439	594	306	472	306	534	422	399	404	518	369	440	469	550	333	488	508	418	491	434	451	19.1755	21.93	18.2254	20.423	23.416	17.2493	20.916	14.96	24.5516	20.6907	19.2304	18.7092	24.0074	18.2548	22.1214	22.6397	26.2364	15.7861	24.3298	25.2375	20.6337	23.9895	20.9933	22.8619	426.688
evm.TU.Contig184.652	470	440	417	355	278	347	433	397	532	454	324	433	472	355	525	480	433	503	521	261	444	528	426	586	12.1675	10.398	9.84116	7.84843	5.20799	9.2956	9.11851	9.22359	11.6238	10.5784	7.42094	9.52928	10.3958	8.346	12.5435	11.0113	9.81586	11.3317	12.344	6.16201	10.4156	12.2595	9.79261	14.1167	436.855
evm.TU.Contig262.41	249	308	363	406	568	342	404	475	442	266	351	337	629	589	407	458	338	329	501	509	574	333	333	406	7.87867	8.89608	10.4705	10.9706	13.0054	11.1976	10.3984	13.4882	11.8035	7.5752	9.82588	9.06468	16.9323	16.9245	11.8851	12.8414	9.36499	9.05888	14.5079	14.6876	16.4574	9.45002	9.35585	11.9539	520.603
evm.TU.Contig88.8	472	470	355	361	655	313	305	180	289	426	482	476	684	774	678	361	284	263	251	223	221	319	447	385	17.3315	15.7538	11.8831	11.3201	17.4043	11.8928	9.11016	5.93161	8.95623	14.0787	15.6586	14.8583	21.3678	25.8096	22.9763	11.7461	9.13165	8.40378	8.43492	7.46754	7.3533	10.5056	14.5743	13.1548	688.953
evm.TU.Contig45.81	135	135	378	857	754	393	203	307	303	276	188	215	224	186	957	636	130	496	519	283	117	430	905	439	9.26316	8.45578	23.6442	50.2177	37.4386	27.9038	11.3306	18.9047	17.547	17.0449	11.4128	12.541	13.0763	11.59	60.6029	38.6701	7.81099	29.6164	32.5916	17.7089	7.27457	26.4624	55.1391	28.0299	452.546
evm.TU.Contig45.451	350	399	617	281	553	236	462	489	405	359	291	293	614	549	306	339	224	383	420	396	460	304	241	329	15.586	16.2193	25.0471	10.6862	17.8202	10.8748	16.7356	19.5425	15.2214	14.3886	11.4649	11.0918	23.2619	22.2016	12.576	13.377	8.73476	14.8419	17.117	16.082	18.5618	12.1416	9.52946	13.633	468.9
evm.TU.Contig462.93	258	298	373	282	299	397	297	255	287	234	406	351	740	750	588	298	271	256	502	254	415	383	441	573	32.7945	34.5774	43.2212	30.6113	27.5027	52.2176	30.7093	29.0889	30.7891	26.7705	45.6581	37.9278	80.0247	86.5744	68.9787	33.5653	30.1639	28.3169	58.3981	29.4438	47.7998	43.6632	49.7744	67.7746	667.869
evm.TU.Contig154.647	313	459	304	170	216	119	343	287	543	350	204	415	566	331	735	235	246	190	557	392	344	455	608	508	11.2993	15.1256	10.0043	5.2409	5.64264	4.44527	10.0724	9.29811	16.544	11.3719	6.51549	12.7357	17.3834	10.8513	24.4878	7.51738	7.7764	5.96877	18.4024	12.9054	11.2528	14.7317	19.4893	17.0648	528.927
evm.TU.Contig612.90	412	215	200	144	442	459	216	739	385	556	172	249	367	807	95	192	295	272	200	944	481	368	114	250	18.5586	8.84061	8.2127	5.5394	14.4077	21.3947	7.91472	29.8745	14.6367	22.5415	6.8547	9.53493	14.0646	33.0118	3.94938	7.66377	11.6361	10.6621	8.24503	38.7793	19.6332	14.8673	4.55974	10.479	405.326
evm.TU.Contig21.100	290	256	416	369	744	181	359	304	271	313	315	236	587	458	540	354	228	262	479	226	245	430	261	435	13.0189	10.4909	17.0246	14.1467	24.1698	8.40816	13.1101	12.2478	10.2679	12.6468	12.5112	9.00655	22.4195	18.6719	22.3732	14.0823	8.96292	10.2354	19.6801	9.25262	9.96644	17.3133	10.4041	18.1718	510.414
evm.TU.Contig184.872	349	356	456	351	594	210	342	387	431	460	299	280	251	217	312	436	260	360	470	389	281	348	251	278	21.8666	20.3611	26.0452	18.7808	26.9318	13.6151	17.4307	21.7607	22.7912	25.9402	16.5744	14.9136	13.3795	12.347	18.0413	24.2067	14.2648	19.6283	26.9505	22.2272	15.9536	19.5556	13.9642	16.2081	252.539
evm.TU.Contig383.285	365	414	487	400	296	243	479	467	632	251	178	179	51	117	136	465	271	399	586	497	304	163	250	264	17.1761	17.7839	20.8915	16.0747	10.0797	11.8327	18.3358	19.7222	25.1006	10.6308	7.41077	7.16069	2.0418	4.99995	5.90647	19.39	11.1671	16.3392	25.2373	21.3289	12.9629	6.87948	10.4462	11.5603	99.4549
evm.TU.Contig14.161	276	281	422	393	613	126	585	430	442	272	298	278	320	367	277	298	189	228	367	198	278	282	203	314	9.55797	8.88295	13.3222	11.6225	15.3617	4.51514	16.4795	13.3638	12.9185	8.47782	9.13027	8.18409	9.42795	11.5417	8.85304	9.14461	5.73133	6.87094	11.6315	6.25317	8.72364	8.75872	6.24221	10.1185	310.297
evm.TU.Contig394.272	354	424	519	105	180	97	341	256	568	494	145	266	301	283	406	312	191	340	314	267	316	430	272	351	12.724	13.9117	17.0057	3.223	4.68182	3.60775	9.97028	8.25784	17.2307	15.9811	4.61104	8.12776	9.20444	9.23748	13.468	9.93727	6.01161	10.6347	10.3291	8.75206	10.2921	13.8619	8.6811	11.7397	320.986
evm.TU.Contig149.79	192	222	280	314	450	86	427	386	341	141	208	283	294	194	176	431	378	540	375	399	441	342	240	325	8.16113	8.61383	10.8496	11.398	13.8415	3.78262	14.7642	14.7246	12.2331	5.3942	7.8221	10.226	10.6318	7.48854	6.90427	16.2337	14.0695	19.9741	14.5879	15.4668	16.9857	13.038	9.05828	12.8547	212.232
evm.TU.Contig184.573	223	281	233	209	303	121	315	210	264	238	230	247	718	798	473	261	252	247	370	274	317	231	300	255	5.8507	6.72983	5.5727	4.68274	5.75265	3.28498	6.72274	4.94457	5.84575	5.62004	5.33878	5.50895	16.0265	19.0131	11.453	6.06787	5.7895	5.6393	8.8842	6.5559	7.53631	5.43563	6.98892	6.2255	637.735
evm.TU.Contig346.9	177	301	319	476	412	180	329	266	402	591	154	197	192	141	139	456	188	372	599	204	474	195	197	230	6.711	10.4178	11.0258	15.4125	11.304	7.06206	10.1471	9.05111	12.8639	20.1679	5.16589	6.34964	6.19335	4.85489	4.8639	15.3204	6.24179	12.2739	20.7852	7.05379	16.285	6.63107	6.63232	8.1147	151.369
evm.TU.Contig9.27	351	333	311	193	459	200	362	215	259	196	281	257	564	450	332	272	241	286	220	241	175	276	268	355	8.61933	7.46458	6.962	4.04739	8.15646	5.08208	7.23116	4.73818	5.36784	4.33193	6.10497	5.36499	11.783	10.0352	7.52421	5.91872	5.18228	6.11164	4.94427	5.39712	3.89404	6.0787	5.84369	8.11196	430.397
evm.TU.Contig184.284	195	291	147	296	164	193	439	225	481	374	152	364	268	124	606	124	226	203	340	444	221	293	447	184	6.9413	9.4557	4.77013	8.99805	4.22447	7.10899	12.7117	7.18778	14.4506	11.9822	4.78697	11.0148	8.11618	4.00843	19.9083	3.91129	7.04453	6.28821	11.0764	14.4134	7.12844	9.35424	14.1286	6.09473	327.175
evm.TU.Contig4.18	52	25	531	21	814	39	362	25	333	56	105	82	6	37	95	362	139	161	399	297	52	1108	286	1148	3.32078	1.45737	30.9128	1.14527	37.6169	2.57719	18.8052	1.43279	17.9479	3.21872	5.93248	4.45163	0.325986	2.14578	5.59907	20.4851	7.773	8.9472	23.3197	17.297	3.0091	63.4616	16.2177	68.2196	45.9485
evm.TU.Contig418.19	306	281	291	239	444	276	214	262	273	278	311	236	285	328	312	204	220	281	169	250	190	262	236	291	16.4402	13.7812	14.2523	10.9656	17.262	15.344	9.35258	12.6326	12.3789	13.4428	14.7828	10.7787	13.0269	16.0032	15.4702	9.71197	10.3501	13.1376	8.30969	12.2491	9.24985	12.6247	11.2586	14.5482	298.826
evm.TU.Contig987.42	289	278	382	254	231	269	195	200	242	362	323	403	286	297	257	197	296	325	163	166	138	190	245	167	6.01872	5.285	7.25231	4.51742	3.48129	5.797	3.30349	3.73803	4.25358	6.78537	5.9514	7.13477	5.06737	5.61706	4.93964	3.6355	5.39803	5.88999	3.10676	3.15277	2.60424	3.54891	4.53062	3.23634	270.496
evm.TU.Contig60.187	193	247	156	267	245	165	303	246	196	285	189	371	304	152	419	218	278	233	181	277	197	296	343	223	7.41939	8.66767	5.46692	8.76543	6.81553	6.56357	9.47516	8.48697	6.35918	9.86086	6.42812	12.1242	9.9425	5.30642	14.8656	7.42609	9.35822	7.79457	6.368	9.71113	6.86236	10.2056	11.7082	7.97713	283.954
evm.TU.Contig12.531	194	216	184	369	362	446	285	265	243	236	244	274	117	98	193	247	250	225	173	267	249	243	285	176	9.37525	9.52861	8.10599	15.2286	12.6594	22.3029	11.2036	11.493	9.91109	10.2648	10.4323	11.2564	4.81036	4.30085	8.60785	10.5772	10.5793	9.46213	7.6514	11.7672	10.9038	10.5323	12.2296	7.91453	132.796
evm.TU.Contig477.409	221	217	304	359	380	189	269	237	222	312	193	211	218	205	295	174	227	225	204	236	193	235	189	206	9.08533	8.14334	11.3928	12.6036	11.3046	8.03998	8.99566	8.74386	7.70256	11.5442	7.01967	7.37394	7.62457	7.6533	11.1925	6.33855	8.17168	8.04926	7.67524	8.84788	7.18955	8.66465	6.89915	7.88037	232.81
evm.TU.Contig555.414	242	197	149	301	277	281	274	258	288	247	248	262	151	185	161	237	248	247	223	264	227	193	258	181	17.4344	12.9555	9.78555	18.5187	14.4409	20.948	16.0574	16.6809	17.5113	16.0158	15.8072	16.0458	9.25507	12.1035	10.7047	15.1298	15.6452	15.4851	14.7032	17.345	14.8188	12.4705	16.5043	12.1339	160.495
evm.TU.Contig143.101	180	247	212	47	201	22	339	256	288	229	143	190	314	327	105	256	327	250	422	227	355	197	87	252	4.28229	5.36407	4.59776	0.954887	3.46036	0.54159	6.56048	5.46575	5.78268	4.90341	3.00989	3.84261	6.35541	7.06477	2.30541	5.39679	6.81222	5.17569	9.18817	4.92502	7.65294	4.20344	1.83784	5.57872	237.319
evm.TU.Contig28.410	12	18	10	167	98	1358	112	68	59	21	9	51	42	452	49	190	98	27	338	1240	488	100	31	301	0.464539	0.636075	0.352897	5.52088	2.7453	54.3983	3.52689	2.36242	1.92764	0.731677	0.308244	1.67834	1.38325	15.8901	1.75063	6.51759	3.32204	0.909557	11.9749	43.7765	17.1182	3.47197	1.06559	10.8427	175.557
evm.TU.Contig184.751	250	215	220	212	268	212	221	229	209	223	201	286	242	184	186	183	195	226	195	221	137	218	220	213	7.81711	6.13676	6.27099	5.661	6.06406	6.85942	5.62123	6.42611	5.51552	6.27582	5.56049	7.60224	6.43773	5.22482	5.36755	5.07049	5.33923	6.1495	5.58026	6.30199	3.88171	6.11361	6.10822	6.19751	196.474
evm.TU.Contig184.337	141	199	162	202	251	101	263	209	177	183	180	268	323	131	281	207	236	200	219	251	192	202	248	196	7.30335	9.40915	7.64935	8.93522	9.40803	5.41338	11.0813	9.71528	7.73766	8.53125	8.24871	11.8007	14.2336	6.16199	13.4328	9.50092	10.7041	9.01484	10.3815	11.8565	9.01157	9.38402	11.4062	9.44691	236.274
evm.TU.Contig12.423	176	276	301	99	185	117	180	135	163	198	172	242	396	175	326	98	144	128	293	315	193	184	193	244	5.75833	8.24304	8.97754	2.76611	4.38004	3.96109	4.79059	3.96391	4.50096	5.83053	4.97878	6.73083	11.0227	5.19959	9.84369	2.8412	4.12557	3.64434	8.77334	9.39882	5.72186	5.39929	5.60695	7.42856	288.063
evm.TU.Contig411.27	264	224	285	177	261	94	188	202	189	231	230	314	163	113	101	362	357	216	113	138	136	195	138	187	10.9412	8.47428	10.7674	6.26448	7.82751	4.03119	6.33798	7.51308	6.61083	8.61651	8.43333	11.0627	5.74723	4.25291	3.86312	13.2942	12.9559	7.79004	4.286	5.21577	5.10735	7.2482	5.07838	7.21162	120.584
evm.TU.Contig294.304	102	123	193	38	107	53	279	178	363	332	243	362	93	37	88	171	402	127	158	339	238	320	165	305	6.06984	6.68154	10.4699	1.93113	4.60769	3.26361	13.5056	9.50612	18.2313	17.7817	12.7936	18.3128	4.70837	1.99952	4.83299	9.01707	20.9479	6.57667	8.60493	18.3974	12.8337	17.079	8.7186	16.8892	70.1976
evm.TU.Contig130.72	177	245	220	197	229	140	190	237	199	219	218	195	186	247	184	183	193	182	106	152	193	106	142	118	6.67287	8.4314	7.56082	6.34244	6.24737	5.4615	5.82674	8.01851	6.33178	7.43092	7.27121	6.24947	5.96572	8.45635	6.40197	6.1134	6.37139	5.97084	3.65728	5.2259	6.59315	3.5841	4.7535	4.13954	199.031
evm.TU.Contig21.508	54	66	155	300	246	198	36	183	101	154	71	45	146	27	555	113	44	170	401	147	85	360	513	217	4.00782	4.4715	10.487	19.0146	13.2121	15.2063	2.17345	12.1891	6.32659	10.2871	4.66212	2.8392	9.21888	1.8198	38.0158	7.43165	2.85959	10.9796	27.2378	9.94971	5.71649	23.9636	33.8078	14.9867	241.229
evm.TU.Contig585.34	124	141	215	151	196	108	220	186	189	152	165	159	167	167	220	272	162	212	234	227	222	157	212	106	4.21496	4.37508	6.6622	4.38329	4.82115	3.79875	6.08313	5.67403	5.4221	4.65023	4.96212	4.5945	4.82947	5.15508	6.90162	8.19282	4.82197	6.27095	7.27949	7.03682	6.83788	4.78637	6.39873	3.35281	179.538
evm.TU.Contig293.1	209	172	175	167	357	109	366	287	274	152	240	150	154	125	83	141	100	150	241	255	175	99	63	112	11.1835	8.40143	8.53641	7.63128	13.8236	6.03534	15.931	13.7822	12.3741	7.32037	11.3619	6.82324	7.0107	6.07417	4.09887	6.68562	4.68563	6.98468	11.8021	12.4437	8.48525	4.75117	2.99334	5.57672	115.618
evm.TU.Contig189.24	188	213	179	67	355	14	221	164	211	145	188	85	317	89	91	134	68	132	257	113	201	313	440	170	9.07208	9.3826	7.87425	2.76105	12.3965	0.699072	8.67509	7.10231	8.5934	6.29762	8.02635	3.48688	13.0143	3.90019	4.05272	5.72989	2.8734	5.54304	11.35	4.97286	8.78904	13.5465	18.8533	7.63359	156.558
evm.TU.Contig84.232	233	140	290	263	575	238	511	358	240	262	368	274	38	9	7	80	77	70	22	132	63	32	33	33	10.1978	5.59339	11.5706	9.83013	18.2114	10.7789	18.1931	14.0618	8.86538	10.3208	14.2499	10.1946	1.41497	0.357719	0.282753	3.10267	2.95108	2.6661	0.881229	5.26872	2.49856	1.25614	1.28249	1.34399	16.9049
evm.TU.Contig260.22	206	225	185	112	194	65	103	77	145	199	105	140	393	364	369	116	252	126	189	112	125	130	96	109	7.41239	7.3904	6.06834	3.4416	5.05144	2.42019	3.01482	2.4865	4.40345	6.44471	3.34265	4.28241	12.0308	11.8943	12.2539	3.69863	7.94015	3.94536	6.22395	3.67526	4.07565	4.19536	3.06724	3.64963	362.798
evm.TU.Contig462.214	149	154	213	181	185	221	162	136	130	219	164	160	165	174	226	205	275	236	146	122	144	128	131	104	8.13695	7.67699	10.6038	8.44122	7.31088	12.4886	7.19653	6.66532	5.99173	10.7641	7.92374	7.42788	7.66603	8.62922	11.3904	9.92023	13.1506	11.2153	7.29696	6.07595	7.12581	6.26932	6.35232	5.28494	183.22
evm.TU.Contig447.337	198	156	203	191	270	85	292	203	289	263	239	186	57	51	27	124	79	152	121	136	116	128	92	89	14.2645	10.2591	13.332	11.751	14.076	6.33659	17.1123	13.1249	17.5721	17.0532	15.2335	11.3913	3.49364	3.33664	1.7952	7.91601	4.98376	9.5293	7.97794	8.93531	7.57263	8.2706	5.88526	5.96641	43.0646
evm.TU.Contig12.514	146	147	169	32	188	20	161	69	150	103	52	71	429	268	360	125	118	132	264	126	125	113	164	211	10.836	9.95924	11.4343	2.02822	10.0971	1.53599	9.72015	4.59589	9.39592	6.88035	3.41451	4.47963	27.0883	18.0632	24.6589	8.22085	7.66891	8.52537	17.9321	8.52832	8.40661	7.5219	10.808	14.5723	339.731
evm.TU.Contig555.232	130	153	187	114	152	55	257	210	288	180	106	132	142	104	140	81	154	136	196	108	151	153	143	104	7.29756	7.84008	9.56936	5.465	6.17448	3.19479	11.7355	10.5794	13.6446	9.09423	5.26443	6.29908	6.78162	5.30169	7.25302	4.02913	7.56994	6.64352	10.0694	5.52888	7.68082	7.70302	7.12781	5.43249	124.448
evm.TU.Contig184.721	110	59	81	218	288	167	180	152	95	78	237	142	109	101	61	191	122	156	127	155	163	83	84	62	4.28075	2.09592	2.87355	7.24494	8.1104	6.72494	5.69813	5.30857	3.12022	2.732	8.15993	4.6977	3.60882	3.5694	2.19085	6.58648	4.15743	5.28296	4.52319	5.50095	5.74793	2.89695	2.90264	2.24517	86.6453
evm.TU.Contig54.499	115	119	166	116	237	109	146	149	120	115	137	85	157	176	173	115	71	121	156	141	130	101	96	128	3.36291	3.17657	4.4252	2.89685	5.0152	3.29829	3.47298	3.9103	2.96164	3.02673	3.54445	2.11303	3.90596	4.67387	4.66896	2.97994	1.81808	3.07913	4.17499	3.76024	3.44474	2.64895	2.49272	3.48304	163.482
evm.TU.Contig66.768	106	166	112	0	136	1	184	104	193	77	46	47	243	40	16	63	207	111	204	367	142	191	249	142	4.09865	5.85918	3.94784	0	3.80536	0.040011	5.78742	3.6089	6.29833	2.67969	1.57363	1.5449	7.99377	1.40456	0.570967	2.15858	7.00878	3.73493	7.21902	12.9413	4.9753	6.62373	8.54909	5.10921	92.6936
evm.TU.Contig44.170	198	178	197	99	261	65	136	137	115	201	158	137	60	54	66	137	112	142	86	127	57	176	134	82	12.1532	9.97334	11.023	5.18934	11.5928	4.12842	6.79044	7.54663	5.95741	11.104	8.58013	7.14851	3.1332	3.01	3.73875	7.45142	6.01979	7.58472	4.83101	7.109	3.17028	9.68888	7.30326	4.6835	58.1513
evm.TU.Contig462.215	162	161	174	102	72	118	65	117	112	129	124	114	151	187	184	69	167	135	123	80	97	96	108	115	8.51067	7.72092	8.33306	4.57614	2.73718	6.41468	2.77776	5.51621	4.96593	6.09954	5.76343	5.09123	6.74895	8.92148	8.92119	3.21211	7.6825	6.17174	5.9138	3.83281	4.6176	4.52329	5.038	5.62182	168.925
evm.TU.Contig249.40	87	81	92	124	169	49	137	144	126	118	110	128	169	103	172	73	72	151	97	166	91	132	115	77	3.20878	2.72709	3.09325	3.90565	4.51055	1.87009	4.1103	4.76639	3.92216	3.91707	3.58942	4.01328	5.30296	3.44989	5.85471	2.38581	2.32536	4.84644	3.2742	5.58351	3.04129	4.36646	3.76621	2.64267	143.215
evm.TU.Contig154.132	118	153	268	166	266	97	123	188	96	122	121	83	74	48	50	82	95	144	83	102	65	92	79	49	2.35261	2.78455	4.87091	2.82636	3.83771	2.00117	1.99483	3.36382	1.61538	2.18921	2.13435	1.40675	1.25519	0.869074	0.920015	1.44869	1.65855	2.49837	1.51447	1.85459	1.1743	1.6451	1.39856	0.909066	55.08
evm.TU.Contig421.169	179	173	207	253	193	50	185	122	137	151	155	102	82	74	85	71	80	53	84	69	61	55	69	63	7.4417	6.56538	7.84506	8.98236	5.80629	2.15097	6.25638	4.55182	4.80699	5.65008	5.70114	3.60486	2.9003	2.79381	3.26133	2.61559	2.91237	1.91743	3.19604	2.61605	2.29797	2.05077	2.54715	2.4372	77.7782
evm.TU.Contig16.372	90	92	130	160	172	85	130	112	172	133	127	112	103	112	90	113	87	131	104	102	91	85	96	80	3.92872	3.66598	5.17319	5.96457	5.43324	3.83948	4.6162	4.38766	6.33681	5.22539	4.90482	4.15619	3.82522	4.4399	3.62583	4.37098	3.32556	4.97628	4.15485	4.06057	3.59953	3.32784	3.72105	3.24959	98.1802
evm.TU.Contig66.1365	90	89	137	61	185	21	154	164	361	99	43	81	35	81	78	67	122	128	105	112	107	127	122	139	4.76588	4.30215	6.61345	2.75855	7.08916	1.15071	6.63367	7.79383	16.134	4.7184	2.01456	3.64632	1.57681	3.89523	3.81199	3.14389	5.65715	5.89842	5.08866	5.40876	5.1343	6.0317	5.73649	6.84931	63.2922
evm.TU.Contig421.401	197	186	173	29	140	16	180	96	151	238	102	123	60	29	38	121	184	203	78	54	71	87	79	54	9.61831	8.28972	7.69991	1.20915	4.94633	0.808346	7.14887	4.20639	6.22219	10.4585	4.40599	5.10513	2.49227	1.28581	1.71227	5.23492	7.86661	8.62489	3.4853	2.40439	3.14114	3.80966	3.42488	2.45334	40.5931
evm.TU.Contig60.232	14	77	12	135	96	25	110	44	104	72	11	79	24	9	157	187	170	291	373	205	186	84	153	64	1.03214	5.18197	0.806487	8.49951	5.12157	1.90719	6.59682	2.91118	6.47107	4.7775	0.717485	4.95114	1.50533	0.602558	10.6823	12.2164	10.9748	18.6693	25.167	13.7829	12.4256	5.55423	10.0158	4.39056	63.3867
evm.TU.Contig383.168	187	156	128	156	251	30	191	80	100	205	162	122	87	83	66	55	74	90	64	39	72	79	99	81	7.26025	5.52877	4.5303	5.17232	7.0519	1.20525	6.0322	2.78744	3.27675	7.16346	5.56462	4.0266	2.87369	2.92641	2.36489	1.89219	2.51582	3.04073	2.27407	1.38087	2.53302	2.75088	3.41296	2.92635	75.7873
evm.TU.Contig612.89	235	89	91	46	200	157	52	126	110	134	83	78	161	289	42	112	77	62	35	102	102	122	68	79	10.7758	3.72536	3.80392	1.80133	6.63645	7.44951	1.93963	5.18514	4.25706	5.53028	3.36723	3.04051	6.28087	12.0345	1.77742	4.55086	3.0918	2.474	1.46881	4.26542	4.23818	5.01739	2.76871	3.37087	156.902
evm.TU.Contig21.409	98	133	67	45	89	37	141	113	173	90	88	116	107	32	151	75	142	120	133	172	178	79	140	96	2.8887	3.57868	1.80035	1.13276	1.8984	1.12856	3.38087	2.98924	4.30384	2.38769	2.29493	2.90672	2.68331	0.85659	4.1078	1.95898	3.66524	3.0781	3.58791	4.62363	4.75437	2.08852	3.66429	2.63317	94.1859
evm.TU.Contig180.641	92	93	90	116	99	75	121	111	118	157	73	87	137	146	166	109	97	79	125	103	98	77	108	136	1.90642	1.75917	1.70012	2.05277	1.48453	1.60819	2.03962	2.06424	2.0637	2.92812	1.33833	1.53256	2.41525	2.74745	3.17464	2.00147	1.76011	1.42457	2.37058	1.94646	1.84015	1.43105	1.98719	2.62241	145.295
evm.TU.Contig280.55	47	96	117	59	62	13	151	243	183	64	69	76	108	28	84	154	103	65	167	124	184	89	103	111	2.53333	4.72345	5.74892	2.71579	2.41829	0.725073	6.62069	11.7546	8.32489	3.10479	3.29044	3.48238	4.95254	1.37056	4.17859	7.35541	4.86148	3.04882	8.23803	6.09529	8.98686	4.30248	4.92966	5.56734	70.5237
evm.TU.Contig3.53	66	68	149	159	139	76	149	104	98	111	107	97	108	85	90	98	99	99	142	81	72	73	79	103	6.08224	5.72035	12.5174	12.5132	9.26951	7.24733	11.1696	8.6012	7.62218	9.20665	8.72397	7.59906	8.46747	7.11353	7.65452	8.00272	7.98899	7.93925	11.9763	6.80743	6.0124	6.03361	6.46446	8.83258	90.9814
evm.TU.Contig147.26	59	186	63	162	175	102	98	34	117	191	45	171	7	2	142	33	121	174	66	90	52	76	188	40	2.1138	6.08301	2.05759	4.95652	4.53703	3.78143	2.85607	1.09319	3.53778	6.1589	1.42638	5.20806	0.213363	0.065071	4.69522	1.04765	3.79607	5.42482	2.16405	2.94057	1.68815	2.44208	5.98073	1.33353	50.8459
evm.TU.Contig267.19	99	146	29	22	29	20	68	23	147	187	28	148	43	3	96	38	245	184	86	42	84	112	217	109	6.78597	9.13532	1.8121	1.2878	1.43846	1.41857	3.79156	1.41485	8.50408	11.5366	1.69803	8.62397	2.50759	0.186743	6.07301	2.30809	14.7055	10.9754	5.39496	2.62545	5.21738	6.88541	13.2075	6.95239	46.6157
evm.TU.Contig421.50_evm.TU.Contig421.51	101	114	110	44	115	44	153	92	121	109	68	51	82	97	99	65	89	77	119	52	64	102	82	71	2.88859	2.97621	2.8679	1.07465	2.38004	1.30215	3.55949	2.36134	2.92067	2.80575	1.72061	1.23995	1.99521	2.51931	2.6131	1.64729	2.2289	1.91637	3.11476	1.35627	1.65859	2.61637	2.0824	1.88953	89.9518
evm.TU.Contig66.295	3	14	0	37	66	0	82	57	163	2	0	8	21	1	66	231	87	95	495	170	259	28	130	74	0.713459	3.03928	0	7.5145	11.3583	0	15.8633	12.1655	32.7167	0.428092	0	1.61736	4.24891	0.21597	14.486	48.6802	18.1178	19.6606	107.737	36.8702	55.8141	5.97229	27.4522	16.3761	29.085
evm.TU.Contig180.4	55	43	38	105	100	75	119	195	78	50	51	73	78	51	78	94	58	104	54	52	68	65	61	82	2.52201	1.79989	1.58845	4.11172	3.31822	3.55868	4.43877	8.02462	3.01864	2.06354	2.06902	2.84561	3.04291	2.12373	3.30091	3.81947	2.32889	4.14994	2.26616	2.17453	2.82546	2.6732	2.4837	3.49887	66.7499
evm.TU.Contig21.78	77	63	72	35	161	15	169	68	116	88	49	52	94	9	11	114	135	127	79	60	44	87	36	46	3.45208	2.57825	2.94259	1.34001	5.22322	0.695867	6.16325	2.73593	4.38916	3.55085	1.94356	1.98181	3.58533	0.36642	0.455134	4.52884	5.29982	4.95472	3.24138	2.45313	1.78747	3.4982	1.43311	1.91902	35.3922
evm.TU.Contig66.603	142	105	132	29	74	56	88	51	57	95	56	54	48	88	21	88	114	71	55	65	52	87	65	57	3.90628	2.63669	3.31021	0.681277	1.47309	1.59407	1.9692	1.25907	1.32338	2.35211	1.36293	1.26281	1.12338	2.19839	0.533151	2.14511	2.7461	1.69964	1.38468	1.63067	1.29621	2.14649	1.58772	1.45908	50.2419
evm.TU.Contig12.384_evm.TU.Contig12.385	64	53	87	31	107	59	178	295	87	63	67	77	22	4	0	90	86	104	55	57	63	22	8	25	2.58461	1.95382	3.20288	1.06912	3.12695	2.46553	5.84746	10.6916	2.96529	2.28989	2.39387	2.64347	0.755871	0.146697	0	3.22069	3.04124	3.65488	2.03278	2.09927	2.30543	0.796842	0.286873	0.939475	8.02417
evm.TU.Contig341.123	47	77	80	50	122	12	120	42	104	30	54	37	119	65	33	31	25	28	147	98	110	51	29	79	2.09157	3.12795	3.24542	1.90018	3.92877	0.552586	4.34398	1.67737	3.90608	1.20159	2.12608	1.39973	4.50539	2.62684	1.35533	1.22244	0.974208	1.08432	5.98694	3.97721	4.43571	2.03554	1.14593	3.27139	68.5905
evm.TU.Contig154.33	3	25	12	16	15	156	23	149	1	25	61	61	11	23	40	94	21	62	55	207	126	49	144	37	0.195152	1.48452	0.711606	0.888838	0.706099	10.5008	1.21706	8.6985	0.0549016	1.4637	3.51069	3.37327	0.608773	1.35871	2.40142	5.41841	1.19621	3.50969	3.27437	12.2801	7.42709	2.85879	8.31764	2.23967	24.3384
evm.TU.Contig66.1371	1	27	6	13	35	2	26	29	101	0	5	16	12	1	96	56	45	41	384	64	169	24	63	66	0.0455712	1.12318	0.249258	0.505923	1.1542	0.0943116	0.963821	1.18603	3.88459	0	0.201591	0.61984	0.465246	0.0413845	4.03755	2.26137	1.79573	1.62592	16.0153	2.6598	6.97868	0.980927	2.54928	2.79876	36.4845
evm.TU.Contig181.1	24	27	41	34	157	3	83	48	17	9	79	48	130	132	91	24	33	91	16	22	24	22	12	8	2.06008	2.11559	3.20821	2.49231	9.75202	0.266464	5.7954	3.6976	1.23156	0.695303	5.99943	3.50254	9.4935	10.2895	7.20892	1.82548	2.48041	6.79734	1.25691	1.72216	1.86672	1.69367	0.914617	0.638989	113.245
evm.TU.Contig721.5	65	55	44	88	112	82	86	125	33	90	62	27	22	11	16	37	14	35	21	30	39	25	38	7	2.22427	1.71803	1.37257	2.57163	2.77341	2.90357	2.3939	3.83876	0.953063	2.77189	1.87705	0.785429	0.640483	0.341833	0.505301	1.12194	0.419507	1.04224	0.657668	0.936212	1.2093	0.767271	1.15463	0.222896	15.7021
evm.TU.Contig54.191	20	38	31	110	37	21	106	28	48	63	72	67	22	93	41	93	68	53	34	24	31	23	8	32	0.797496	1.38317	1.12685	3.74578	1.06763	0.866488	3.43825	1.00199	1.61538	2.26099	2.54005	2.27113	0.746332	3.36766	1.50882	3.28605	2.37435	1.83908	1.24077	0.872747	1.1201	0.822548	0.283253	1.18735	50.6721
evm.TU.Contig28.411	37	44	9	7	24	77	70	36	18	38	1	37	8	43	30	36	66	31	114	100	73	89	75	45	1.44412	1.56765	0.320223	0.23332	0.677855	3.10984	2.22246	1.26099	0.592938	1.33489	0.0345314	1.22765	0.265646	1.52412	1.08064	1.24508	2.25572	1.05291	4.07213	3.55944	2.5818	3.1155	2.59926	1.63436	26.5018
evm.TU.Contig55.43	15	12	32	146	71	39	137	85	91	21	42	19	19	11	7	65	25	36	43	47	82	21	6	19	0.545356	0.398258	1.06059	4.53307	1.86797	1.46723	4.05175	2.77341	2.79231	0.687175	1.35098	0.587235	0.587697	0.363185	0.234879	2.09409	0.795914	1.13898	1.43077	1.55835	2.70146	0.684768	0.193698	0.642797	11.7383
evm.TU.Contig184.387	3	4	3	46	45	12	57	43	44	2	1	14	9	2	27	128	28	60	220	163	72	25	42	33	0.221418	0.269492	0.201846	2.89935	2.40341	0.91647	3.42215	2.84818	2.74081	0.132856	0.0652985	0.878394	0.565126	0.134051	1.83913	8.37133	1.80962	3.85362	14.8603	10.9713	4.81527	1.65488	2.7525	2.2664	12.5379
evm.TU.Contig40.91	10	29	16	6	25	0	47	21	74	18	13	17	197	152	82	8	4	1	123	57	49	38	47	29	0.519997	1.37656	0.758452	0.266442	0.940727	0	1.98807	0.980002	3.24763	0.842428	0.598075	0.751483	8.71522	7.1778	3.93524	0.368624	0.182137	0.0452508	5.85355	2.70305	2.30884	1.77223	2.17013	1.40323	137.164
evm.TU.Contig12.287	88	50	14	37	77	18	47	184	38	17	15	11	26	4	0	121	18	70	7	32	63	60	28	15	3.52381	1.82765	0.511051	1.26527	2.23122	0.745842	1.53095	6.61232	1.28424	0.612685	0.531412	0.374448	0.885755	0.145457	0	4.29346	0.63116	2.43923	0.256532	1.16858	2.28595	2.15484	0.995573	0.558922	9.24799
evm.TU.Contig96.462	0	2	0	30	31	128	107	14	53	4	84	36	0	3	1	102	60	99	40	38	58	20	17	1	0	0.0540066	0	0.75787	0.6636	3.91812	2.57477	0.37167	1.32322	0.106498	2.19843	0.905303	0	0.0805918	0.027301	2.67372	1.55422	2.54849	1.08292	1.02514	1.5547	0.530625	0.446537	0.0275267	1.30828
evm.TU.Contig344.109	40	78	50	4	50	0	48	71	109	21	17	14	47	9	17	28	27	50	71	32	47	22	26	22	1.82285	3.24474	2.07715	0.155669	1.64886	0	1.77936	2.90372	4.19228	0.861329	0.68541	0.54236	1.82221	0.37246	0.714983	1.13068	1.07744	1.98283	2.96116	1.3299	1.94082	0.899183	1.05208	0.932919	23.0429
evm.TU.Contig184.719	26	20	34	14	29	28	78	62	61	22	32	61	17	1	19	22	42	20	49	33	36	76	91	25	1.37134	0.962932	1.63477	0.630594	1.10686	1.52818	3.34656	2.93474	2.71541	1.04437	1.49325	2.73508	0.762835	0.0478981	0.924871	1.02822	1.9398	0.917966	2.36527	1.58732	1.72056	3.59517	4.26185	1.22699	11.9548
evm.TU.Contig28.408	25	22	10	33	50	47	22	29	32	89	24	26	48	60	38	17	23	17	27	48	51	52	32	61	1.32916	1.06771	0.484668	1.49831	1.92367	2.58571	0.951465	1.3837	1.43589	4.25879	1.12891	1.17511	2.17115	2.89691	1.86456	0.800901	1.07079	0.786523	1.31375	2.32733	2.45699	2.47957	1.51068	3.01785	46.9434
evm.TU.Contig612.91	113	55	34	12	32	5	21	77	32	55	21	31	44	53	4	23	20	14	11	69	26	35	12	19	20.8271	9.25351	5.71262	1.88878	4.26797	0.953595	3.14848	12.7364	4.97775	9.1237	3.42436	4.85713	6.89942	8.87099	0.680402	3.75638	3.22788	2.24545	1.85548	11.5978	4.34229	5.78565	1.96389	3.25862	31.9498
evm.TU.Contig300.52	12	6	7	26	127	14	14	76	41	7	28	32	24	13	9	32	14	28	19	46	161	15	10	17	1.09672	0.500566	0.583204	2.02927	8.39927	1.324	1.04082	6.23355	3.16252	0.575801	2.26404	2.48619	1.86611	1.07896	0.759126	2.59154	1.12042	2.22689	1.58921	3.834	13.3333	1.22954	0.811523	1.44576	14.5915
evm.TU.Contig447.352	17	60	28	122	6	20	19	22	49	20	93	58	9	32	17	22	18	4	39	34	47	16	11	5	1.01803	3.27988	1.52854	6.23911	0.260007	1.23933	0.925547	1.18234	2.47652	1.07796	4.92726	2.95263	0.458527	1.74024	0.939544	1.16742	0.943891	0.208448	2.13742	1.85682	2.55039	0.859344	0.584912	0.278621	18.852
evm.TU.Contig16.549	2	7	13	92	13	7	5	115	46	1	38	22	6	21	6	68	18	8	63	23	61	5	8	38	0.0764861	0.244368	0.453213	3.00463	0.359764	0.27701	0.155545	3.9469	1.48472	0.03442	1.28572	0.715227	0.195216	0.729321	0.211768	2.30438	0.602785	0.266236	2.20499	0.802156	2.11387	0.171497	0.271661	1.35228	10.6553
evm.TU.Contig154.54	52	46	70	23	36	15	24	24	19	50	41	29	24	10	11	15	23	12	15	29	13	28	18	15	1.08193	0.873675	1.32771	0.408673	0.542029	0.322949	0.406201	0.448141	0.333645	0.936325	0.754731	0.512937	0.424834	0.188949	0.211225	0.276555	0.419047	0.217272	0.285629	0.550268	0.245096	0.522505	0.332549	0.290415	14.2986
evm.TU.Contig341.448	17	6	16	13	50	0	16	8	14	3	26	25	49	54	197	8	11	21	11	20	10	6	28	29	0.484527	0.156104	0.415715	0.316419	1.03124	0	0.370955	0.204628	0.336768	0.0769572	0.655621	0.605728	1.18816	1.39769	5.18193	0.202046	0.274536	0.520851	0.286929	0.519849	0.258265	0.153375	0.708619	0.769127	99.1207
evm.TU.Contig154.32	2	6	7	28	9	54	20	60	1	8	25	22	6	10	4	64	7	22	22	88	21	16	51	18	0.356729	0.97691	1.13819	4.26499	1.16165	9.96661	2.90183	9.60432	0.150537	1.28427	3.94512	3.33581	0.910481	1.61978	0.658454	10.1154	1.09331	3.41473	3.59124	14.3143	3.3941	2.55955	8.07727	2.98753	6.4223
evm.TU.Contig28.407	17	9	13	14	37	54	14	59	5	12	21	7	39	68	4	12	4	13	15	59	50	10	4	18	1.39257	0.672983	0.970772	0.979368	2.19326	4.57726	0.932884	4.33736	0.345677	0.884723	1.52194	0.487454	2.71795	5.05851	0.302401	0.871045	0.286922	0.926692	1.12453	4.40755	3.71136	0.734686	0.290946	1.37205	35.2692
evm.TU.Contig600.295	1	2	8	79	25	15	14	30	47	1	26	16	8	14	0	35	15	8	41	37	51	3	41	2	0.0551552	0.100696	0.402238	3.72104	0.997812	0.856096	0.628126	1.48496	2.18785	0.0496415	1.26873	0.750197	0.375394	0.701231	0	1.71059	0.724461	0.383974	2.06959	1.86109	2.5489	0.148403	2.00796	0.102647	6.9736
evm.TU.Contig967.217	22	59	61	23	6	12	37	8	48	40	23	31	3	11	5	19	42	6	1	9	9	28	6	10	4.59037	11.2375	11.6028	4.0983	0.905938	2.5909	6.27999	1.49803	8.45278	7.5118	4.24584	5.49864	0.532546	2.08432	0.962833	3.51294	7.67382	1.08943	0.190958	1.71256	1.70162	5.23984	1.11163	1.94158	6.16615
evm.TU.Contig96.268	38	35	50	10	46	25	56	33	53	38	15	24	6	2	1	0	8	6	5	13	7	3	9	4	2.72285	2.2893	3.26601	0.611916	2.38518	1.85364	3.26409	2.12208	3.20516	2.45066	0.950918	1.46191	0.365766	0.130142	0.0661298	0	0.501959	0.374125	0.327887	0.849499	0.454501	0.192796	0.572623	0.266705	2.82074
evm.TU.Contig694.306	1	2	0	20	19	23	6	5	3	1	37	58	0	0	4	52	24	101	21	25	60	0	1	1	0.104327	0.190467	0	1.78187	1.4344	2.48295	0.509189	0.468135	0.264149	0.0938975	3.41513	5.14389	0	0	0.385133	4.80718	2.19252	9.16941	2.00506	2.37856	5.67208	0	0.0926361	0.0970791	1.35374
evm.TU.Contig253.100	24	26	13	32	37	13	24	3	2	29	15	32	4	3	13	53	16	34	7	5	6	22	14	20	1.3981	1.3826	0.690364	1.59195	1.55974	0.783639	1.13729	0.15684	0.0983313	1.5205	0.77309	1.5847	0.198243	0.158707	0.698921	2.73588	0.816179	1.72358	0.373198	0.26563	0.31672	1.14944	0.724172	1.08415	6.59332
evm.TU.Contig471.66	0	0	2	15	16	49	24	7	12	0	6	8	3	10	9	76	12	34	20	19	60	21	10	6	0	0	0.105469	0.741021	0.669778	2.93312	1.12936	0.363407	0.585873	0	0.307079	0.393412	0.147646	0.525334	0.480493	3.89578	0.607865	1.71156	1.05884	1.00235	3.14511	1.08954	0.513658	0.322976	7.1966
evm.TU.Contig54.266	23	31	29	36	23	30	33	18	12	9	25	11	9	2	2	17	16	14	12	4	9	1	2	4	1.14571	1.40963	1.3169	1.53144	0.829083	1.54637	1.33719	0.804686	0.504502	0.403505	1.10179	0.465811	0.381418	0.0904741	0.0919462	0.750393	0.697919	0.606877	0.547069	0.181713	0.406244	0.0446769	0.0884633	0.185412	4.07704
evm.TU.Contig16.791	12	23	9	3	15	0	12	11	15	7	4	11	17	1	5	20	13	12	46	22	20	47	9	28	0.831996	1.45567	0.568839	0.177628	0.752582	0	0.67679	0.684446	0.877738	0.436814	0.245364	0.648338	1.00277	0.0629632	0.319938	1.22875	0.789261	0.724013	2.91885	1.39105	1.25651	2.92262	0.554074	1.80646	7.21671
evm.TU.Contig969.5	19	43	13	2	3	4	11	10	13	14	2	7	11	40	17	10	8	12	23	17	19	8	13	19	1.04448	2.15778	0.651471	0.0938913	0.119341	0.227536	0.491892	0.493345	0.603145	0.692678	0.0972715	0.327123	0.514456	1.99688	0.862482	0.487121	0.385099	0.574052	1.15714	0.85226	0.946443	0.39443	0.634561	0.971917	22.0502
evm.TU.Contig60.68	2	9	6	101	12	39	10	12	7	8	10	17	0	2	1	4	2	6	4	49	10	1	4	4	0.0751435	0.308673	0.205504	3.24066	0.326261	1.51625	0.305628	0.404621	0.221969	0.270527	0.332408	0.542974	0	0.0682398	0.0346751	0.133172	0.0658004	0.196172	0.137542	1.67894	0.340453	0.0336974	0.133446	0.139847	0.984999
evm.TU.Contig66.1099	4	4	2	7	30	21	13	2	8	5	6	7	33	11	22	30	19	34	8	14	7	4	14	9	0.388021	0.354201	0.176861	0.579889	2.10591	2.10795	1.02582	0.174113	0.654967	0.436541	0.514941	0.577249	2.72346	0.969025	1.96959	2.57875	1.61394	2.87012	0.71023	1.23852	0.615305	0.348009	1.2059	0.812399	21.0982
evm.TU.Contig480.447	29	21	14	14	30	3	12	14	9	10	11	14	12	7	5	14	6	17	12	14	7	21	9	4	2.09836	1.38706	0.923459	0.86509	1.57082	0.22462	0.706312	0.909111	0.549615	0.651241	0.704184	0.861152	0.738711	0.459968	0.333894	0.897642	0.380164	1.07043	0.794652	0.923824	0.458962	1.36281	0.578243	0.269323	7.62662
evm.TU.Contig421.392	11	6	6	1	29	0	0	0	4	3	6	17	33	25	90	6	1	3	1	4	1	10	17	29	0.296694	0.147728	0.147528	0.0230339	0.566027	0	0	0	0.0910564	0.0728278	0.143179	0.389794	0.757254	0.612355	2.24035	0.143404	0.0236186	0.0704147	0.0246848	0.098391	0.0244407	0.241909	0.407147	0.727856	48.6377
evm.TU.Contig625.41	5	17	6	4	3	0	2	6	14	8	4	12	6	1	21	5	25	26	27	40	23	11	21	8	0.494424	1.53452	0.540863	0.337785	0.214671	0	0.160876	0.53246	1.1684	0.711997	0.349945	1.00874	0.504767	0.0897999	1.91648	0.438119	2.16475	2.23732	2.44347	3.60718	2.06088	0.975567	1.84389	0.736123	9.26614
evm.TU.Contig28.419	8	4	5	8	4	13	8	3	3	6	4	10	7	4	3	9	8	4	7	16	119	10	1	16	0.312611	0.142682	0.178111	0.266965	0.113109	0.525657	0.254294	0.105206	0.0989394	0.21102	0.138288	0.332187	0.232714	0.141945	0.108191	0.311637	0.273742	0.136019	0.250337	0.570181	4.21364	0.350469	0.0346976	0.581788	4.45013
evm.TU.Contig154.322	17	9	12	11	10	13	13	8	10	14	15	11	7	1	6	8	19	22	9	6	16	6	11	9	0.525374	0.253897	0.338071	0.290311	0.223636	0.415727	0.32681	0.221879	0.260828	0.38941	0.41013	0.288989	0.184047	0.0280651	0.17113	0.21908	0.514175	0.591654	0.254552	0.169102	0.44806	0.166305	0.301855	0.258817	4.49558
evm.TU.Contig555.569	4	1	3	3	10	4	11	11	8	7	7	1	45	2	8	8	4	11	14	16	24	8	11	4	0.230788	0.0526682	0.157791	0.147818	0.417519	0.238813	0.516273	0.569578	0.389563	0.363506	0.357325	0.0490482	2.20891	0.104793	0.425991	0.409012	0.202093	0.552296	0.739257	0.841885	1.25476	0.41398	0.56355	0.214756	17.1221
evm.TU.Contig14.6	6	1	5	2	13	2	7	10	14	0	1	6	11	0	20	4	3	10	40	15	10	7	9	16	0.312734	0.0475793	0.237575	0.0890234	0.490331	0.107869	0.296793	0.467767	0.615864	0	0.0461142	0.265854	0.487783	0	0.962077	0.184746	0.136925	0.453574	1.90808	0.713006	0.472302	0.327233	0.416535	0.776023	10.1342
evm.TU.Contig61.75	0	3	0	2	25	0	7	1	2	1	1	6	0	0	4	41	24	33	12	22	0	3	4	4	0	0.327397	0	0.204193	2.16282	0	0.680753	0.107291	0.201801	0.107601	0.105772	0.609788	0	0	0.441342	4.34345	2.51251	3.43319	1.31297	2.39861	0	0.321673	0.424624	0.44499	1.35374
evm.TU.Contig45.189_evm.TU.Contig45.190	15	19	6	1	0	3	8	2	19	11	4	13	1	2	14	9	21	10	0	2	12	7	11	0	0.45823	0.529834	0.16709	0.0260881	0	0.0948327	0.198799	0.0548313	0.489868	0.302443	0.108109	0.337602	0.0259898	0.0554841	0.394708	0.243628	0.561757	0.265838	0	0.0557187	0.332177	0.19179	0.298381	0	5.6906
evm.TU.Contig54.18	3	5	37	4	10	3	19	1	5	9	19	8	7	2	0	2	2	11	5	11	3	4	8	9	0.0973374	0.148089	1.09438	0.110833	0.234791	0.100722	0.50147	0.0291182	0.136919	0.262821	0.54541	0.220657	0.193227	0.0589298	0	0.0575017	0.0568232	0.310582	0.148471	0.325484	0.0882015	0.1164	0.230481	0.271727	2.78826
evm.TU.Contig63.365	1	0	3	5	3	4	3	4	1	3	1	6	10	62	29	7	11	0	8	1	7	1	4	11	0.0347755	0	0.0951046	0.148489	0.0754948	0.143939	0.0848648	0.124836	0.0293499	0.0938975	0.0307669	0.177376	0.295859	1.958	0.930739	0.215707	0.334968	0	0.254611	0.0317141	0.220581	0.0311895	0.123515	0.355957	32.9177
evm.TU.Contig28.328	2	6	6	5	11	2	2	7	11	12	11	3	12	19	6	9	2	7	11	6	5	7	6	7	0.147448	0.40379	0.403244	0.314797	0.586846	0.152575	0.119942	0.463142	0.68444	0.79625	0.717485	0.188018	0.752664	1.27207	0.408241	0.587955	0.129115	0.449089	0.74219	0.403403	0.334022	0.462852	0.392777	0.480218	11.8444
evm.TU.Contig81.641	0	0	8	15	49	4	1	22	0	2	8	3	0	5	6	11	0	3	0	5	17	0	6	2	0	0	0.399911	0.702439	1.9444	0.226971	0.0446066	1.08267	0	0.0987087	0.388121	0.139848	0	0.248991	0.303651	0.534505	0	0.143157	0	0.250043	0.844718	0	0.292148	0.102053	3.64702
evm.TU.Contig96.936	0	0	0	0	21	0	4	10	0	1	14	3	18	20	37	0	3	7	4	15	1	1	0	3	0	0	0	0	1.21337	0	0.259803	0.716568	0	0.0718638	0.988985	0.20363	1.22274	1.4502	2.72652	0	0.209754	0.486378	0.292297	1.09225	0.0723514	0.071612	0	0.222896	24.4949
evm.TU.Contig66.596	0	0	0	3	2	23	1	0	0	0	0	3	2	4	16	17	1	2	9	13	2	0	17	4	0	0	0	0.13731	0.0775682	1.27557	0.0435977	0	0	0	0	0.136685	0.0911952	0.194687	0.791421	0.80737	0.046932	0.0932795	0.441456	0.635409	0.0971309	0	0.809032	0.19949	7.31999
evm.TU.Contig63.156	4	5	3	2	6	0	12	8	17	3	4	5	2	1	2	4	3	6	1	0	0	5	4	4	0.270272	0.308393	0.184786	0.115404	0.293369	0	0.65956	0.485106	0.969444	0.18244	0.239117	0.287197	0.114969	0.0613602	0.124717	0.239493	0.1775	0.35279	0.0618378	0	0	0.303002	0.239986	0.251496	1.61206
evm.TU.Contig107.3	3	5	11	4	4	1	13	1	14	4	2	2	2	1	0	1	15	4	2	7	1	0	0	2	0.0884689	0.134597	0.295712	0.100735	0.0853595	0.0305151	0.31185	0.0264652	0.348442	0.106167	0.0521807	0.0501382	0.0501776	0.0267803	0	0.0261313	0.387345	0.102649	0.0539775	0.188255	0.0267218	0	0	0.054882	0.935195
evm.TU.Contig363.115	0	2	0	6	0	0	0	0	1	0	0	1	17	23	10	1	0	0	2	0	3	1	4	3	0	0.111135	0	0.311909	0	0	0	0	0.0513758	0	0	0.0517481	0.88041	1.27145	0.5618	0.0539408	0	0	0.111421	0	0.165479	0.0545959	0.216208	0.169933	16.0211
evm.TU.Contig154.149	0	0	0	0	0	18	0	4	0	1	0	1	1	4	1	2	0	0	3	9	3	0	7	0	0	0	0	0	0	1.18719	0	0.228806	0	0.0573667	0	0.0541839	0.0542265	0.23153	0.0588244	0.11296	0	0	0.174999	0.523145	0.173268	0	0.396173	0	1.93752
evm.TU.Contig51.61	1	1	1	1	15	1	6	4	1	0	0	3	0	6	1	0	1	3	3	0	1	0	0	0	0.0403845	0.0368645	0.0368147	0.0344878	0.438357	0.0417887	0.197105	0.144971	0.0340838	0	0	0.102992	0	0.220045	0.037271	0	0.0353632	0.105429	0.110879	0	0.0365941	0	0	0	2.27813
evm.TU.Contig374.2	0	2	0	1	0	0	0	0	0	3	0	0	1	7	12	0	4	3	0	1	3	0	4	1	0	0.0759003	0	0.0355034	0	0	0	0	0	0.112253	0	0	0.0353696	0.26428	0.460422	0	0.145618	0.108534	0	0.0379138	0.113015	0	0.147661	0.0386857	6.63015
evm.TU.Contig63.51	0	1	2	0	1	0	3	0	4	1	2	0	4	2	0	2	6	1	0	0	1	0	4	3	0	0.0416278	0.083143	0	0.0329998	0	0.111287	0	0.153951	0.0410438	0.0806919	0	0.155189	0.0828258	0	0.0808186	0.239595	0.0396839	0	0	0.0413224	0	0.16197	0.127304	1.87039
evm.TU.Contig63.555	1	3	2	0	4	0	3	0	5	1	1	2	0	0	1	2	2	2	3	0	1	1	1	0	0.072754	0.199238	0.132646	0	0.210591	0	0.177546	0	0.307016	0.0654811	0.0643677	0.123696	0	0	0.0671449	0.128938	0.127416	0.126623	0.199752	0	0.0659255	0.0652517	0.0646015	0	0.338434
evm.TU.Contig555.407	0	0	1	0	2	2	1	0	1	0	0	7	2	0	9	4	1	1	0	0	0	0	0	3	0	0	0.078148	0	0.124069	0.177413	0.0697338	0	0.072351	0	0	0.510127	0.145865	0	0.712049	0.303853	0.0750669	0.0745995	0	0	0	0	0	0.239311	3.65782
evm.TU.Contig184.731	4	1	1	0	17	0	0	0	0	0	0	0	0	0	0	0	0	0	0	6	0	0	3	0	0.17461	0.0398477	0.0397938	0	0.537007	0	0	0	0	0	0	0	0	0	0	0	0	0	0	0.238857	0	0	0.116283	0	0
evm.TU.Contig207.10	1	0	0	5	1	0	2	0	1	1	0	1	0	4	1	2	3	0	0	2	1	0	1	4	0.0816134	0	0	0.348484	0.0590587	0	0.132777	0	0.0688803	0.0734548	0	0.0693794	0	0.296461	0.0753213	0.144638	0.214398	0	0	0.148857	0.0739533	0	0.0724681	0.303775	1.63156
evm.TU.Contig130.81	0	0	1	0	3	0	1	0	0	3	0	3	0	1	1	5	0	0	2	0	1	0	2	0	0	0	0.229116	0	0.545622	0	0.204447	0	0	0.678622	0	0.640971	0	0.228242	0.231955	1.11355	0	0	0.460035	0	0.227743	0	0.446338	0	0.661717
evm.TU.Contig101.49	0	2	1	0	0	0	0	0	0	0	0	7	0	0	0	2	0	0	0	2	1	1	0	1	0	0.167548	0.0836605	0	0	0	0	0	0	0	0	0.546111	0	0	0	0.162643	0	0	0	0.167387	0.0831591	0.0823092	0	0.0853974	0
evm.TU.Contig54.235	0	0	0	0	0	0	0	0	0	3	0	0	1	4	3	3	0	0	0	2	0	0	0	0	0	0	0	0	0	0	0	0	0	0.157155	0	0	0.0495174	0.211424	0.161148	0.154725	0	0	0	0.106159	0	0	0	0	2.61439
evm.TU.Contig447.193	0	0	0	0	2	0	0	1	0	0	0	0	3	0	0	0	0	0	3	0	1	1	0	1	0	0	0	0	0.161666	0	0	0.100247	0	0	0	0	0.2851	0	0	0	0	0	0.30669	0	0.101219	0.100184	0	0.103943	0.917869
[truncated: 28 more columns]

## Sheet: MYB
gene_id	CK14d_1_count	CK14d_2_count	CK14d_3_count	CK1d_1_count	CK1d_2_count	CK1d_3_count	CK3d_1_count	CK3d_2_count	CK3d_3_count	CK7d_1_count	CK7d_2_count	CK7d_3_count	GA14d_1_count	GA14d_2_count	GA14d_3_count	GA1d_1_count	GA1d_2_count	GA1d_3_count	GA3d_1_count	GA3d_2_count	GA3d_3_count	GA7d_1_count	GA7d_2_count	GA7d_3_count	CK14d_1_fpkm	CK14d_2_fpkm	CK14d_3_fpkm	CK1d_1_fpkm	CK1d_2_fpkm	CK1d_3_fpkm	CK3d_1_fpkm	CK3d_2_fpkm	CK3d_3_fpkm	CK7d_1_fpkm	CK7d_2_fpkm	CK7d_3_fpkm	GA14d_1_fpkm	GA14d_2_fpkm	GA14d_3_fpkm	GA1d_1_fpkm	GA1d_2_fpkm	GA1d_3_fpkm	GA3d_1_fpkm	GA3d_2_fpkm	GA3d_3_fpkm	GA7d_1_fpkm	GA7d_2_fpkm	GA7d_3_fpkm	GA14dvsCK14d_GA14d
evm.TU.Contig555.440	1846	2271	2028	3210	1689	2266	1692	1106	1071	1888	2640	2351	1350	2592	1736	1625	1234	1464	1073	1231	1279	1234	1469	880	61.9551	69.5756	62.0469	92.0028	41.0201	78.6955	46.1932	33.3125	30.3367	57.0304	78.3899	67.076	38.5469	79	53.7714	48.3271	36.2658	42.7574	32.9578	37.6775	38.8966	37.1446	43.7777	27.4827	1838.51
evm.TU.Contig583.171	2310	2322	2452	1734	3064	892	2193	1437	2448	2313	2082	1744	1166	1376	995	1577	890	1428	1455	1820	1274	1609	863	1145	178.224	163.535	172.457	114.249	171.066	71.2136	137.634	99.4985	159.404	160.616	142.117	114.385	76.5355	96.4092	70.8488	107.815	60.1286	95.8753	102.738	128.057	89.0675	111.338	59.1221	82.2034	1138.32
evm.TU.Contig987.38	936	1182	1318	1655	1558	1307	1372	1194	1333	1230	959	1509	2932	2115	3306	1303	1855	1929	1791	1638	1986	1541	1629	2198	32.1289	37.0367	41.2423	48.5142	38.6999	46.4238	38.3095	36.7816	38.6175	38.0001	29.1239	44.033	85.6238	65.9291	104.732	39.633	55.7572	57.6205	56.2638	51.2758	61.7726	47.4414	49.6509	70.2067	2699.67
evm.TU.Contig12.504	895	1375	1560	1610	1105	1398	765	520	372	1639	2101	1469	562	1257	846	819	747	889	482	439	530	809	1118	709	22.7006	31.8355	36.07	34.8731	20.2814	36.6916	15.7837	11.8365	7.96326	37.4156	47.1467	31.6742	12.1272	28.9532	19.8034	18.4073	16.591	19.6219	11.1886	10.1545	12.1811	18.4034	25.1792	16.7337	864.629
evm.TU.Contig207.227	2587	2571	1873	530	701	473	1362	1521	2219	1154	610	654	346	465	353	663	535	1121	885	944	781	290	360	250	132.243	119.97	87.2814	23.1368	25.9309	25.0198	56.6353	69.7771	95.7344	53.0936	27.5879	28.42	15.0475	21.5862	16.6536	30.0319	23.948	49.8664	41.4032	44.0076	36.1763	13.2957	16.3405	11.8918	375.655
evm.TU.Contig66.1078	1784	1625	1101	550	810	170	258	143	187	1201	913	790	2041	2525	1199	248	296	294	376	269	339	545	661	467	66.99	55.701	37.6886	17.6372	22.0101	6.60555	7.88075	4.81901	5.92639	40.5898	30.3317	25.218	65.2032	86.104	41.5519	8.252	9.73295	9.607	12.9216	9.21184	11.5348	18.3547	22.0395	16.3179	1846.53
evm.TU.Contig341.314	291	379	319	1272	682	1468	1010	703	764	839	1543	1063	220	1022	213	769	607	280	811	1306	796	586	332	608	16.6022	19.7381	16.5909	61.9741	28.1565	86.6648	46.8734	35.9943	36.7874	43.0817	77.8841	51.5554	10.6784	52.9505	11.2152	38.8768	30.3248	13.9013	42.3454	67.9507	41.1511	29.985	16.8188	32.278	469.792
evm.TU.Contig421.254	400	480	754	350	549	295	656	522	408	573	747	688	284	541	218	605	596	508	495	425	570	547	314	727	20.6061	22.5721	35.4091	15.3977	20.4659	15.7254	27.4899	24.1331	17.739	26.5674	34.0461	30.1296	12.447	25.3093	10.3645	27.6175	26.8856	22.7732	23.3375	19.9666	26.6077	25.2731	14.3632	34.8499	335.566
evm.TU.Contig66.636	616	608	846	542	616	287	259	166	79	782	828	567	635	1087	570	212	322	335	157	128	126	327	335	302	34.9339	31.4749	43.7364	26.2492	25.2795	16.842	11.9481	8.44852	3.78117	39.9146	41.5439	27.3349	30.6373	55.9812	29.833	10.6535	15.9904	16.5324	8.14852	6.61995	6.4749	16.6322	16.8693	15.9369	738.598
evm.TU.Contig562.8	162	248	372	344	448	267	238	287	368	213	203	342	1093	443	976	340	586	529	694	575	500	226	362	559	5.91904	8.27146	12.3904	10.7336	11.845	10.0947	7.07368	9.41075	11.348	7.00446	6.5621	10.6226	33.9756	14.699	32.9111	11.008	18.7487	16.8196	23.2065	19.1594	16.554	7.40593	11.7444	19.0055	807.936
evm.TU.Contig708.1	436	853	497	111	35	28	245	103	471	370	311	362	99	281	449	73	166	37	224	142	463	186	212	221	27.6307	49.3456	28.7123	6.0073	1.60508	1.83615	12.63	5.85799	25.1918	21.1041	17.4372	19.5022	5.33766	16.1718	26.2608	4.0994	9.21193	2.04048	12.9917	8.20677	26.5878	10.5719	11.9296	13.0325	273.089
evm.TU.Contig555.360	358	647	352	181	134	227	346	141	175	543	379	488	68	230	162	189	468	232	85	219	246	208	51	137	21.3614	35.2408	19.1468	9.22309	5.78594	14.0158	16.7941	7.55045	8.8129	29.1612	20.0077	24.7535	3.45197	12.463	8.9211	9.99312	24.4529	12.0465	4.64172	11.9171	13.3008	11.1313	2.70211	7.60674	149.986
evm.TU.Contig14.50	230	555	590	111	119	118	104	110	20	202	323	280	71	167	105	173	229	123	41	141	47	118	58	42	11.2543	24.7902	26.3179	4.63838	4.21368	5.97474	4.1396	4.83049	0.825954	8.89616	13.9832	11.6471	2.95571	7.42088	4.74174	7.5012	9.81217	5.23748	1.83607	6.29202	2.08395	5.17856	2.52003	1.91237	111.247
evm.TU.Contig60.372	38	53	94	49	112	125	80	65	65	67	73	32	474	721	187	57	41	84	309	69	265	34	22	46	1.49547	1.90399	3.37232	1.6468	3.18959	5.09037	2.56104	2.29569	2.15894	2.37317	2.54172	1.07057	15.8702	25.7677	6.79191	1.98775	1.41291	2.87673	11.1293	2.47641	9.4501	1.20007	0.768781	1.68455	441.397
evm.TU.Contig189.84	46	80	93	60	109	46	70	66	131	97	67	55	553	564	153	19	34	31	240	90	223	56	81	39	1.93912	3.07845	3.57386	2.15998	3.32503	2.00655	2.40037	2.49688	4.66071	3.68026	2.49881	1.97096	19.8328	21.591	5.95244	0.70973	1.25506	1.13719	9.25916	3.45994	8.51821	2.11724	3.03192	1.52983	403.306
evm.TU.Contig84.155	99	118	87	75	121	141	103	142	96	90	179	139	218	206	127	122	100	110	97	99	108	86	86	136	2.70322	2.94118	2.16557	1.74887	2.39086	3.98391	2.28779	3.47969	2.21233	2.21181	4.32424	3.22648	5.06422	5.1081	3.20041	2.95187	2.39102	2.61375	2.42399	2.46524	2.67218	2.1061	2.08511	3.45554	176.276
evm.TU.Contig81.1184	102	126	145	81	119	65	304	131	100	185	62	54	37	48	29	113	83	80	73	94	122	45	20	46	3.99284	4.50243	5.17437	2.70781	3.37094	2.63294	9.68029	4.60214	3.30382	6.51798	2.14726	1.79699	1.23224	1.70636	1.0477	3.9197	2.8451	2.72519	2.61528	3.35574	4.32751	1.5799	0.695181	1.6756	36.6525
evm.TU.Contig81.159	64	34	101	37	100	64	86	71	44	49	44	24	283	373	142	45	24	51	250	43	196	33	8	23	4.25076	2.06139	6.11526	2.09865	4.80628	4.39857	4.64641	4.23205	2.46645	2.92915	2.58553	1.35509	15.9913	22.4979	8.70424	2.64845	1.39584	2.94769	15.1964	2.60456	11.7961	1.96578	0.471805	1.42149	255.228
evm.TU.Contig296.298	64	79	70	77	110	73	107	84	81	67	77	96	68	56	92	99	101	80	83	83	54	91	75	54	2.72736	3.07316	2.71937	2.80224	3.39218	3.21907	3.70919	3.21254	2.91328	2.56979	2.90312	3.47779	2.46537	2.1672	3.61832	3.73844	3.76896	2.96673	3.23709	3.22567	2.08523	3.47808	2.83799	2.14135	70.0448
evm.TU.Contig3.40	156	448	352	11	7	4	73	7	13	86	98	83	7	67	32	31	79	16	6	10	16	22	2	0	8.82426	23.1327	18.1511	0.531371	0.286533	0.234131	3.35899	0.355352	0.620627	4.37836	4.90446	3.99118	0.33687	3.44172	1.67055	1.55385	3.91308	0.787588	0.310612	0.515861	0.820106	1.11612	0.100455	0	34.6315
evm.TU.Contig3.45	85	527	186	22	2	4	23	14	23	66	37	37	28	100	79	38	18	10	27	46	53	14	7	7	1.69112	9.57108	3.37346	0.373792	0.0287944	0.0823495	0.372234	0.249971	0.386205	1.18184	0.651281	0.625787	0.473942	1.80677	1.45057	0.669934	0.313593	0.173134	0.491624	0.834627	0.955495	0.249815	0.123663	0.129594	67.6313
evm.TU.Contig170.29	18	18	40	5	28	6	38	6	10	4	34	13	129	57	44	11	4	30	87	23	66	6	1	1	0.808072	0.73764	1.63698	0.19169	0.909616	0.278723	1.38769	0.241733	0.378888	0.161621	1.35041	0.496124	4.92695	2.3238	1.823	0.437585	0.157244	1.17199	3.57446	0.941638	2.68484	0.241581	0.0398624	0.0417742	72.7866
evm.TU.Contig600.48	19	18	18	14	11	11	36	16	26	16	17	6	69	109	41	13	3	16	62	14	63	2	6	8	0.848944	0.734163	0.73317	0.534201	0.355664	0.508584	1.30846	0.641581	0.980466	0.643435	0.672025	0.227901	2.62292	4.42281	1.6907	0.514708	0.117377	0.622115	2.53531	0.570469	2.55072	0.0801476	0.238047	0.332618	70.2246
evm.TU.Contig81.1088	10	10	11	20	6	88	13	150	10	9	5	12	2	11	10	60	20	16	17	76	27	5	4	22	0.480809	0.438902	0.482139	0.821209	0.20876	4.37825	0.508451	6.47248	0.405795	0.38947	0.212693	0.490482	0.0818113	0.4803	0.443741	2.55633	0.842054	0.66945	0.748058	3.33246	1.17634	0.215614	0.170773	0.984298	7.55236
evm.TU.Contig264.174	2	3	6	0	18	1	12	6	2	0	1	0	142	241	41	1	0	3	40	16	50	0	0	0	0.103031	0.141076	0.28177	0	0.671013	0.0533066	0.502863	0.277392	0.086956	0	0.0455771	0	6.22351	11.2746	1.94929	0.0456487	0	0.134488	1.88586	0.751683	2.33401	0	0	0	135.233
evm.TU.Contig294.168	1	4	9	0	2	0	29	2	0	0	2	0	167	166	30	5	0	5	56	8	88	0	0	0	0.0521633	0.190467	0.427971	0	0.0754948	0	1.23054	0.093627	0	0	0.0923008	0	7.41126	7.86357	1.44425	0.231114	0	0.226966	2.67341	0.380569	4.15953	0	0	0	114.913
evm.TU.Contig96.198	13	21	20	7	25	9	24	14	26	19	21	20	37	43	30	29	12	20	36	31	39	14	23	18	0.512216	0.755307	0.718368	0.235537	0.712807	0.366942	0.769225	0.495044	0.864603	0.673787	0.732049	0.669898	1.24029	1.5386	1.09091	1.01251	0.414027	0.685749	1.29815	1.11391	1.39242	0.494735	0.80468	0.659953	35.3746
evm.TU.Contig5.171	10	9	34	24	12	11	11	29	11	0	20	21	49	53	30	52	3	44	22	31	36	3	4	13	0.513956	0.422243	1.59298	1.05339	0.446302	0.58501	0.459887	1.33761	0.477147	0	0.909424	0.917517	2.14256	2.47371	1.42299	2.36822	0.135016	1.9679	1.03481	1.453	1.67658	0.138287	0.182546	0.621727	42.2789
evm.TU.Contig84.606	10	10	9	2	4	7	10	9	5	10	9	2	43	65	15	13	4	5	40	8	68	9	0	5	0.459181	0.419159	0.376733	0.0784269	0.132913	0.332604	0.373522	0.37088	0.19377	0.413279	0.365626	0.0780698	1.67982	2.71047	0.63567	0.528956	0.160835	0.199792	1.68096	0.335006	2.82937	0.370648	0	0.213641	39.246
evm.TU.Contig143.21	1	1	0	2	7	0	17	6	1	0	0	1	82	83	14	0	1	1	11	6	13	0	0	4	0.0834612	0.0761867	0	0.142549	0.422771	0	1.15416	0.44941	0.0704398	0	0	0.0709502	5.8225	6.29085	1.07837	0	0.073084	0.072629	0.840216	0.456683	0.983161	0	0	0.310653	56.6589
evm.TU.Contig171.196	1	1	2	2	0	0	5	7	0	0	7	5	59	47	7	0	0	11	13	5	23	0	1	0	0.0474619	0.0433251	0.086533	0.0810635	0	0	0.19304	0.29816	0	0	0.293937	0.201736	2.38236	2.02577	0.306619	0	0	0.454321	0.564679	0.216418	0.989165	0	0.0421435	0	35.6147
evm.TU.Contig3.39	5	9	6	10	2	2	6	1	0	3	58	23	1	9	1	3	6	7	3	4	5	2	2	0	0.306899	0.50427	0.335726	0.524176	0.0888339	0.127028	0.299578	0.0550849	0	0.165732	3.14967	1.20012	0.05222	0.501667	0.0566477	0.16317	0.322489	0.373895	0.168524	0.223906	0.278095	0.110101	0.109004	0	3.55393
evm.TU.Contig279.118	1	1	1	0	4	0	8	2	1	0	10	4	23	32	11	0	0	1	9	1	13	1	0	0	0.0445912	0.0407046	0.0406496	0	0.129072	0	0.290183	0.080036	0.0376342	0	0.394512	0.151628	0.872544	1.29582	0.452687	0	0	0.0388038	0.367286	0.0406656	0.525277	0.039993	0	0	21.1048
evm.TU.Contig810.9	0	6	11	0	4	1	6	22	12	2	2	3	0	1	0	1	8	9	2	5	5	1	0	5	0	0.280409	0.513389	0	0.148194	0.0529775	0.24988	1.01082	0.518515	0.0921586	0.0905916	0.130568	0	0.0464936	0	0.0453669	0.358653	0.400972	0.0937109	0.233451	0.23196	0.0459179	0	0.238203	0.323283
evm.TU.Contig480.46	0	0	0	3	2	0	1	4	3	1	10	5	6	23	4	7	2	0	1	3	18	3	3	5	0	0	0	0.241121	0.136212	0	0.0765588	0.337854	0.238296	0.0847075	0.832671	0.400039	0.480424	1.96579	0.347439	0.583785	0.164828	0	0.0861343	0.257491	1.53508	0.253232	0.250709	0.437889	10.625
evm.TU.Contig81.1265	1	2	0	36	4	1	0	1	8	0	2	4	0	12	0	5	0	0	0	1	0	0	5	2	0.0965818	0.176327	0	2.96926	0.279562	0.0999401	0	0.0866765	0.652107	0	0.170898	0.328416	0	1.0525	0	0.427915	0	0	0	0.0880793	0	0	0.428796	0.179745	3.87939
evm.TU.Contig184.427	0	0	1	0	4	0	0	2	4	3	0	0	0	0	2	3	5	0	23	2	13	0	3	0	0	0	0.0292913	0	0.0930067	0	0	0.0576724	0.108474	0.0867585	0	0	0	0	0.0593087	0.0854172	0.140682	0	0.676352	0.0586058	0.378505	0	0.0855931	0	0.676869
evm.TU.Contig96.523	0	2	0	0	3	6	2	5	2	4	6	9	4	1	1	1	1	4	0	4	1	0	0	1	0	0.110931	0	0	0.131909	0.377247	0.0988535	0.27265	0.102564	0.21875	0.322546	0.46488	0.206776	0.0551793	0.0560771	0.0538421	0.0532067	0.211502	0	0.22165	0.0550587	0	0	0.0565406	1.88554
evm.TU.Contig860.139	7	4	8	3	0	0	0	6	0	0	0	0	3	3	4	1	2	0	0	0	0	0	0	3	0.525409	0.274065	0.54739	0.192297	0	0	0	0.404164	0	0	0	0	0.191572	0.204488	0.277087	0.0665108	0.131452	0	0	0	0	0	0	0.209533	3.24145
evm.TU.Contig60.267	0	0	0	0	1	0	0	0	0	1	0	0	0	0	2	1	0	0	3	0	7	1	1	1	0	0	0	0	0.0235829	0	0	0	0	0.0293314	0	0	0	0	0.0601534	0.028878	0	0	0.0894764	0	0.206713	0.0292287	0.0289374	0.0303253	0.676869
[truncated: 28 more columns]

## Sheet: bZIP
gene_id	CK14d_1_count	CK14d_2_count	CK14d_3_count	CK1d_1_count	CK1d_2_count	CK1d_3_count	CK3d_1_count	CK3d_2_count	CK3d_3_count	CK7d_1_count	CK7d_2_count	CK7d_3_count	GA14d_1_count	GA14d_2_count	GA14d_3_count	GA1d_1_count	GA1d_2_count	GA1d_3_count	GA3d_1_count	GA3d_2_count	GA3d_3_count	GA7d_1_count	GA7d_2_count	GA7d_3_count	CK14d_1_fpkm	CK14d_2_fpkm	CK14d_3_fpkm	CK1d_1_fpkm	CK1d_2_fpkm	CK1d_3_fpkm	CK3d_1_fpkm	CK3d_2_fpkm	CK3d_3_fpkm	CK7d_1_fpkm	CK7d_2_fpkm	CK7d_3_fpkm	GA14d_1_fpkm	GA14d_2_fpkm	GA14d_3_fpkm	GA1d_1_fpkm	GA1d_2_fpkm	GA1d_3_fpkm	GA3d_1_fpkm	GA3d_2_fpkm	GA3d_3_fpkm	GA7d_1_fpkm	GA7d_2_fpkm	GA7d_3_fpkm	GA14dvsCK14d_GA14d
evm.TU.Contig14.164	3592	3317	4564	1794	3345	595	3251	4820	2207	3394	3206	2533	2308	1845	1835	3420	2410	3862	2835	1897	2034	1963	1622	2236	135.572	114.281	157.031	57.8238	91.359	23.2378	99.812	163.262	70.3022	115.293	107.055	81.2713	74.1105	63.2377	63.9183	114.38	79.6503	126.844	97.9263	65.2949	69.5633	66.449	54.3588	78.53	1923.63
evm.TU.Contig54.433	2056	1696	1762	1718	3692	1375	2266	1274	1593	1818	2925	1862	5182	4145	2377	2624	1782	1586	1921	1695	1409	2132	2433	3309	68.8985	51.8808	53.8269	49.1655	89.5304	47.6798	61.7702	38.3144	45.0543	54.8327	86.7208	53.0439	147.739	126.141	73.5144	77.9189	52.2916	46.2503	58.9152	51.8006	42.7852	64.078	72.396	103.184	3729.93
evm.TU.Contig555.229	1403	1518	1701	875	2404	540	2587	1625	2150	1523	1655	1101	1841	1107	1241	1776	1460	1411	1935	1613	1683	1236	1302	1358	72.6709	71.7743	80.3182	38.7045	90.1072	28.9428	109.001	75.5375	93.9885	71.0005	75.8423	48.4796	81.1273	52.0711	59.3241	81.5151	66.2206	63.5997	91.727	76.1931	78.992	57.4191	59.8824	65.4536	1341.14
evm.TU.Contig477.374	1662	1638	1494	1677	1939	1562	1468	1100	1339	1593	1525	1481	1462	1594	1617	1715	1614	1575	1168	1310	1224	1611	1709	1691	44.8643	40.3625	36.7644	38.6593	37.8765	43.6311	32.2351	26.6483	30.5059	38.703	36.4209	33.9855	33.5759	39.0755	40.2843	41.0229	38.1514	36.9978	28.8553	32.2493	29.9397	39.0032	40.9636	42.4761	1509.87
evm.TU.Contig477.492	2268	1964	2186	1355	2163	850	1785	1293	1205	2108	1671	1497	1345	1284	974	1798	1642	1753	1292	1215	751	1439	1037	1046	103.355	81.7008	90.8129	52.7328	71.3295	40.0824	66.17	52.8805	46.3459	86.461	67.3717	57.9938	52.1463	53.1376	40.9643	72.606	65.5241	69.518	53.8848	50.4947	31.0118	58.8147	41.9619	44.3561	1156.24
evm.TU.Contig464.54	1023	1204	1307	877	1814	620	1213	1121	1241	911	1149	908	1677	1644	1525	1075	796	785	1577	1658	1332	1519	1048	1381	31.4249	33.7613	36.6	23.0064	40.3235	19.7076	30.3104	30.9037	32.1739	25.1869	31.2269	23.7112	43.827	45.8613	43.2339	29.2617	21.4116	20.9842	44.3346	46.4474	37.0765	41.8496	28.5855	39.4751	1560.68
evm.TU.Contig477.183	1045	1081	1083	491	1181	1044	776	416	657	1257	1522	1566	1729	1622	1997	1031	1255	1495	554	688	586	1189	1658	1732	37.1385	35.0694	35.0867	14.9018	30.3725	38.3931	22.4338	13.2681	19.7064	40.207	47.8556	47.3117	52.2773	52.3486	65.5001	32.4682	39.0561	46.2353	18.019	22.2985	18.8713	37.8987	52.3212	57.2778	1729.22
evm.TU.Contig171.125	777	745	1136	1238	1639	863	1501	1217	1258	959	978	974	938	1229	910	1234	1011	1198	1261	1275	1140	783	792	918	30.0965	26.3418	40.1125	40.9511	45.9405	34.59	47.2942	42.305	41.1253	33.4328	33.5154	32.0717	30.9106	43.2308	32.5306	42.3547	34.2912	40.3809	44.7016	45.0384	40.0125	27.2014	27.2399	33.0878	992.276
evm.TU.Contig54.306	1057	1108	1483	462	1606	1118	1102	401	547	1077	2436	1033	1749	1522	958	839	924	988	821	504	586	939	1030	1452	35.2431	33.7235	45.0762	13.155	38.7496	38.5732	29.8891	11.9991	15.3929	32.3202	71.86	29.2798	49.6134	46.0851	29.4795	24.7887	26.9779	28.6669	25.0527	15.3253	17.7049	28.0801	30.4945	45.0502	1351.37
evm.TU.Contig45.453	97	267	279	1883	2079	1315	739	2047	428	359	556	679	633	771	593	1849	680	1381	1814	1583	1478	1132	881	1514	3.24237	8.14699	8.50164	53.7517	50.2884	45.4843	20.0941	61.4067	12.0745	10.8005	16.4428	19.2944	18.0014	23.4041	18.2937	54.7672	19.9039	40.1708	55.4935	48.256	44.7674	33.9369	26.1489	47.0921	643.613
evm.TU.Contig421.572	722	1072	997	932	959	473	1057	1246	906	914	763	859	916	668	899	1065	1313	1262	893	1072	884	711	754	840	42.888	58.1283	53.9884	47.2787	41.223	29.074	51.0748	66.4237	45.4214	48.8657	40.0991	43.3771	46.2919	36.0348	49.285	56.0584	68.2969	65.2354	48.5471	58.0727	47.5825	37.8794	39.77	46.4311	800.461
evm.TU.Contig477.441	844	1033	1091	1304	1279	1628	777	741	809	726	719	692	774	1066	985	682	749	860	805	1131	824	821	766	712	26.7818	29.9221	31.5595	35.3367	29.3691	53.4561	20.0563	21.1019	21.6661	20.7345	20.1854	18.6669	20.8953	30.7186	28.8463	19.1767	20.8122	23.7477	23.378	32.7295	23.6931	23.3655	21.583	21.0237	914.787
evm.TU.Contig280.163	637	725	796	367	1370	251	823	578	660	558	688	563	2135	2394	1341	708	373	489	1417	927	950	899	700	1187	16.536	17.18	18.837	8.13594	25.7356	6.74232	17.3789	13.4656	14.46	13.0372	15.8012	12.4242	47.1519	56.4367	32.1274	16.2861	8.47886	11.0465	33.6647	21.9457	22.3466	20.9308	16.1352	28.673	1881
evm.TU.Contig14.384	920	1089	1063	1083	790	666	575	881	435	557	725	704	980	2332	932	1020	901	765	565	522	562	490	556	627	67.6008	73.0443	71.204	67.9585	42.0062	50.6388	34.3688	58.096	26.9766	36.8365	47.1317	43.975	61.2634	155.611	63.2028	66.4135	57.9731	48.916	37.995	34.9795	37.4194	32.292	36.2764	42.8709	1369.15
evm.TU.Contig39.234	754	829	799	771	1054	672	799	581	654	716	906	793	784	767	680	754	625	787	678	634	608	675	747	575	22.9702	23.0538	22.1895	20.0585	23.2358	21.184	19.8004	15.8846	16.8153	19.6321	24.4193	20.537	20.3199	21.2195	19.1187	20.3544	16.6729	20.8638	18.9033	17.6142	16.7839	18.443	20.2069	16.3002	717.963
evm.TU.Contig481.162	582	712	768	873	1230	555	756	590	640	633	714	668	959	935	825	833	682	705	638	547	635	571	702	678	22.7693	25.4273	27.3901	29.167	34.822	22.468	24.0592	20.715	21.132	22.2889	24.7135	22.2163	31.9194	33.2188	29.7877	28.8778	23.364	24.0016	22.8434	19.5161	22.5111	20.0354	24.3865	24.6824	874.889
evm.TU.Contig12.186	721	507	563	1214	1408	664	853	339	451	608	812	657	638	633	605	766	689	644	814	755	455	816	671	553	30.7255	19.7227	21.8715	44.1807	43.4198	29.2803	29.5696	12.9649	16.2208	23.3199	30.6147	23.8011	23.131	24.497	23.7944	28.9257	25.7111	23.8822	31.7469	29.3419	17.57	31.1881	25.3905	21.929	604.591
evm.TU.Contig477.648	701	798	710	525	957	1053	618	294	485	764	911	601	786	785	663	642	702	944	432	441	449	667	743	728	32.0334	33.2876	29.5768	20.4878	31.6461	49.7919	22.9724	12.057	18.7051	31.4223	36.8311	23.3469	30.5576	32.5763	27.9612	25.9964	28.0905	37.539	18.0668	18.3782	18.5921	27.3367	30.1481	30.9562	718.64
evm.TU.Contig245.15	498	596	661	716	1056	433	751	761	605	430	654	513	859	922	630	844	441	603	816	870	823	458	510	707	23.7892	25.989	28.7845	29.2088	36.5036	21.4034	29.1825	32.6243	24.3915	18.4875	27.64	20.8322	34.9103	39.997	27.7745	35.726	18.447	25.0664	35.6741	37.9007	35.6243	19.6223	21.6324	31.4268	774.096
evm.TU.Contig383.140	306	765	53	84	61	49	168	97	310	1275	64	1342	1351	46	2902	230	721	558	608	206	483	947	1971	1002	7.62148	17.393	1.20337	1.78668	1.09944	1.26287	3.40376	2.16818	6.51648	28.5816	1.41029	28.4144	28.6275	1.04045	66.707	5.07619	15.725	12.0942	13.8591	4.67911	10.9009	21.1545	43.5903	23.2229	1410.35
evm.TU.Contig341.634	548	717	686	687	765	463	449	289	405	578	386	638	1014	1128	1141	663	702	743	463	461	610	491	538	519	13.0232	15.5543	14.8617	13.9426	13.1559	11.3858	8.67991	6.16369	8.12316	12.363	8.11586	12.8892	20.5015	24.344	25.0252	13.9618	14.6087	15.3656	10.07	9.99116	13.136	10.4653	11.3528	11.4772	1061.06
evm.TU.Contig45.368	417	545	507	839	953	661	892	624	577	627	644	727	333	432	546	491	518	676	480	739	472	612	568	439	8.85964	10.5699	9.81962	15.2227	14.6519	14.532	15.4162	11.8979	10.3464	11.9896	12.1053	13.1306	6.01915	8.33509	10.706	9.24387	9.63711	12.4983	9.33328	14.3187	9.08695	11.6618	10.7155	8.67911	426.327
evm.TU.Contig40.5	449	516	559	547	1007	652	682	688	545	503	576	560	594	591	546	677	564	672	538	720	597	468	468	543	19.0242	19.9574	21.5913	19.7924	30.8754	28.5859	23.5059	26.161	19.489	19.1817	21.592	20.1705	21.412	22.7402	21.3505	25.418	20.9255	24.7773	20.862	27.8209	22.9209	17.7845	17.6073	21.4087	557.583
evm.TU.Contig154.283	568	700	685	186	541	466	472	328	489	623	737	551	661	912	638	493	552	761	450	612	394	553	627	605	16.6245	18.7022	18.2767	4.64905	11.4583	14.1134	11.2376	8.6155	12.0793	16.4115	19.0844	13.7095	16.4593	24.2405	17.2337	12.7861	14.1474	19.3825	12.0539	16.3354	10.4494	14.5165	16.295	16.4773	712.992
evm.TU.Contig330.87	504	549	589	597	674	411	471	476	532	692	442	553	580	503	615	671	720	641	614	449	515	475	547	565	25.8633	25.717	27.5534	26.1625	25.0285	21.8243	19.6611	21.9213	23.0409	31.9609	20.0672	24.1239	25.3217	23.4406	29.1263	30.5118	32.3536	28.6244	28.836	21.0125	23.9473	21.8616	24.9245	26.9794	548.203
evm.TU.Contig54.479	909	836	1028	331	478	270	397	345	436	697	397	382	612	763	628	394	519	457	678	444	584	396	488	592	25.3312	21.2664	26.1152	7.87719	9.63924	7.78576	8.99944	8.62815	10.2545	17.4817	9.788	9.04951	14.5096	19.3092	16.1513	9.72929	12.6648	11.0824	17.2916	11.2838	14.7469	9.89743	12.0753	15.3513	646.447
evm.TU.Contig171.11	348	403	631	603	929	444	499	559	463	394	583	458	578	749	559	687	407	415	506	488	475	399	472	562	10.5387	11.1406	17.4199	15.5947	20.3586	13.9135	12.2926	15.1924	11.8338	10.739	15.6203	11.7908	14.8918	20.5986	15.6235	18.4357	10.793	10.9366	14.024	13.4775	13.0347	10.8372	12.6922	15.8371	608.166
evm.TU.Contig616.10	550	603	556	501	540	591	406	480	498	505	517	469	548	743	450	455	576	551	517	475	549	581	437	362	28.6223	28.6453	26.3769	22.2654	20.3356	31.8254	17.187	22.4176	21.8728	23.6533	23.8036	20.7484	24.2624	35.1138	21.6128	20.9819	26.2483	24.9528	24.6233	22.5431	25.8887	27.1177	20.1934	17.53	560.158
evm.TU.Contig139.65	500	456	575	538	849	464	506	468	391	445	674	574	580	421	363	419	519	594	398	543	369	485	516	369	21.3762	17.7959	22.4096	19.6423	26.2658	20.5269	17.5972	17.9561	14.1082	17.123	25.4936	20.8613	21.0959	16.3452	14.3226	15.8733	19.4296	22.099	15.5724	21.1709	14.295	18.5967	19.5882	14.6797	436.408
evm.TU.Contig12.98	457	492	530	482	606	496	677	447	482	407	535	497	474	463	372	551	472	543	549	412	495	490	531	508	18.6029	18.282	19.6674	16.7557	17.8509	20.8925	22.4174	16.3297	16.5594	14.9114	19.2677	17.1985	16.4155	17.1156	13.9754	19.875	16.8246	19.2349	20.4527	15.2947	18.2585	17.8894	19.1931	19.2424	420.601
evm.TU.Contig66.1224	594	560	549	284	516	37	1300	1640	763	789	644	436	219	183	215	148	245	159	237	341	315	511	335	172	37.182	31.9984	31.3275	15.1815	23.3732	2.39658	66.1945	92.129	40.3092	44.4511	35.665	23.2007	11.6627	10.4026	12.4205	8.20919	13.4292	8.661	13.5771	19.4661	17.8671	28.6881	18.6199	10.0186	198.928
evm.TU.Contig577.15	452	472	435	444	784	319	447	353	444	487	495	436	548	453	458	417	371	481	402	435	348	475	436	402	14.2882	13.62	12.5353	11.986	17.934	10.4346	11.4942	10.0143	11.8456	13.8557	13.8438	11.7164	14.7377	13.0042	13.3617	11.6807	10.2695	13.2315	11.63	12.5403	9.96816	13.4669	12.238	11.8249	469.114
evm.TU.Contig298.168	381	381	440	432	568	454	475	490	503	335	521	429	453	398	388	479	430	480	474	428	442	413	439	389	15.5569	14.201	16.3779	15.0638	16.783	19.1822	15.777	17.9556	17.3341	12.3113	18.8212	14.891	15.7365	14.758	14.6213	17.3311	15.3746	17.0555	17.7129	15.9375	16.3537	15.1246	15.9165	14.7802	398.577
evm.TU.Contig394.274	211	364	405	294	775	196	300	490	103	188	322	384	1253	839	458	647	269	343	478	404	473	425	178	794	17.9951	28.3379	31.4872	21.4127	47.8296	17.2971	20.8126	37.5038	7.41384	14.4308	24.2962	27.8402	90.9147	64.9802	36.0491	48.8955	20.0892	25.4561	37.309	31.4219	36.5536	32.5084	13.4796	63.0121	809.6
evm.TU.Contig301.66	303	351	329	353	422	414	588	437	653	291	269	316	394	389	341	546	485	350	516	504	510	338	351	348	10.6655	11.2783	10.5571	10.6112	10.7492	15.0795	16.8364	13.8047	19.3994	9.21919	8.37729	9.45576	11.7991	12.4347	11.0777	17.0304	14.9493	10.721	16.6228	16.1789	16.267	10.6707	10.9707	11.3986	361.71
evm.TU.Contig16.388	259	361	298	145	109	251	513	202	422	600	257	771	499	134	730	309	471	358	512	402	268	542	295	834	8.71013	11.0822	9.13583	4.16432	2.65261	8.73461	14.0338	6.09653	11.9776	18.1608	7.64661	22.0419	14.277	4.09238	22.6571	9.20822	13.8702	10.4769	15.7583	12.329	8.16688	16.3478	8.80912	26.0989	443.049
evm.TU.Contig555.18	304	345	435	450	560	386	364	400	327	355	416	430	494	412	355	464	438	443	333	413	333	312	334	380	25.5652	26.4843	33.3481	32.3175	34.0789	33.5898	24.9005	30.1885	23.209	26.8697	30.9513	30.7406	35.3437	31.4644	27.5524	34.5768	32.2542	32.4193	25.629	31.6741	25.3755	23.5323	24.9406	29.7365	404.479
evm.TU.Contig555.371	321	356	304	203	436	841	198	98	197	203	582	247	605	704	391	294	213	186	249	218	153	269	514	657	7.99508	8.09398	6.90237	4.31782	7.85826	21.675	4.01158	2.19053	4.14112	4.55064	12.8248	5.22978	12.8199	15.9234	8.98774	6.48869	4.64552	4.0314	5.67584	4.95168	3.45307	6.00904	11.3675	15.227	545.022
evm.TU.Contig81.537	364	387	382	135	337	67	840	705	704	435	271	469	241	106	353	224	232	282	211	356	277	229	503	160	26.3094	25.5338	25.1698	8.33286	17.6263	5.01105	49.388	45.7304	42.9453	28.2981	17.3296	28.8172	14.8196	6.95764	23.5472	14.3466	14.6837	17.7371	13.9574	23.4659	18.142	14.845	32.2822	10.7612	227.471
evm.TU.Contig54.532	218	223	292	320	553	643	286	239	348	185	232	274	269	491	364	382	297	418	353	378	298	284	384	479	5.34936	4.9951	6.53183	6.70573	9.81958	16.3268	5.70879	5.26319	7.20706	4.08579	5.03668	5.71564	5.61576	10.9414	8.24333	8.30617	6.38174	8.92579	7.92744	8.45894	6.6261	6.25027	8.36685	10.9373	364.224
evm.TU.Contig14.38	333	283	291	378	477	853	187	105	147	273	507	276	456	650	430	283	177	174	202	139	158	313	563	398	14.1363	10.9666	11.2614	13.7036	14.6532	37.4703	6.45754	4.00026	5.26676	10.4307	19.042	9.96027	16.469	25.0584	16.8468	10.6456	6.57966	6.42787	7.84797	5.38129	6.0778	11.9171	21.222	15.722	495.176
evm.TU.Contig188.144	236	237	230	327	371	376	465	293	335	235	343	341	312	273	209	330	322	373	312	349	349	326	342	338	10.7622	9.86579	9.56145	12.7347	12.2429	17.7428	17.2494	11.9912	12.8934	9.6453	13.8387	13.2194	12.1047	11.3057	8.79613	13.3351	12.8583	14.8021	13.0214	14.5142	14.4215	13.3334	13.8484	14.3429	254.447
evm.TU.Contig139.283	187	209	292	323	358	265	450	292	402	357	392	307	213	229	370	348	218	431	347	270	253	306	316	307	3.92402	4.00342	5.58573	5.7882	5.4362	5.75414	7.68131	5.49894	7.1195	6.74244	7.27758	5.47643	3.8026	4.36387	7.16553	6.47085	4.00575	7.87032	6.66397	5.16693	4.81068	5.75899	5.88793	5.99459	264.421
evm.TU.Contig12.185	313	378	387	247	268	140	502	361	581	354	301	221	151	200	143	149	231	355	285	408	183	318	227	179	11.3798	12.5451	12.8265	7.66897	7.05093	5.26698	14.8465	11.7788	17.8278	11.5838	9.68203	6.83047	4.67064	6.60337	4.79823	4.80029	7.35425	11.2316	9.48303	13.5278	6.02888	10.3693	7.32826	6.05582	159.252
evm.TU.Contig184.578	355	273	235	266	365	81	266	276	475	389	198	212	73	53	79	134	258	181	475	381	354	489	338	400	27.5818	19.362	16.6444	17.6493	20.5215	6.51214	16.8116	19.2446	31.1474	27.2021	13.6104	14.0023	4.82534	3.73953	5.66471	9.22553	17.553	12.2376	33.7754	26.9959	24.9226	34.0752	23.3183	28.9191	66.2051
evm.TU.Contig45.560	297	229	357	304	455	79	275	265	244	264	255	184	308	225	161	209	137	253	255	238	195	135	145	157	11.4373	8.05001	12.5326	9.99749	12.6794	3.14803	8.61454	9.15838	7.93031	9.15018	8.68796	6.02356	10.0909	7.86857	5.72201	7.1319	4.61981	8.47837	8.98711	8.35838	6.80452	4.66268	4.95816	5.62597	221.461
evm.TU.Contig394.198	197	213	237	242	413	244	276	194	197	224	301	211	232	232	188	203	191	234	203	266	195	234	248	176	7.52954	7.4315	8.25767	7.89893	11.4229	9.65021	8.58112	6.65442	6.3548	7.70565	10.1784	6.85573	7.54399	8.05261	6.63157	6.87528	6.39253	7.78293	7.10087	9.27177	6.75357	8.02145	8.41666	6.25959	209.609
evm.TU.Contig96.328	159	274	189	116	221	53	255	184	326	163	95	224	229	76	285	182	325	229	315	277	230	211	363	246	5.70266	8.97068	6.17944	3.55295	5.73581	1.96698	7.43966	5.92249	9.86805	5.26171	3.0145	6.82963	6.98757	2.47537	9.43368	5.78421	10.2071	7.14728	10.3396	9.06022	7.47488	6.78731	11.5604	8.21006	191.087
evm.TU.Contig66.454	226	401	309	315	128	425	243	569	140	739	224	250	4	5	5	123	225	116	3	186	45	205	88	50	20.3466	32.9551	25.36	24.2184	8.33905	39.593	17.796	45.973	10.6377	59.8808	17.842	19.1335	0.306376	0.408791	0.415442	9.81255	17.738	9.08798	0.247183	15.2713	3.67107	16.5529	7.03482	4.18876	4.53241
evm.TU.Contig184.851	244	207	174	193	299	126	183	108	165	170	195	136	293	390	212	180	127	113	299	128	164	252	174	163	7.13836	5.52807	4.6405	4.82189	6.32998	3.81438	4.35504	2.83556	4.07405	4.47628	5.04724	3.38234	7.29268	10.3614	5.72402	4.66631	3.25349	2.87682	8.00559	3.41505	4.34759	6.61217	4.52006	4.43739	287.473
evm.TU.Contig84.315	142	209	166	142	173	56	139	172	203	158	114	201	273	130	298	182	247	248	233	177	248	187	322	208	6.82255	9.1664	7.27065	5.82636	6.01488	2.78414	5.43257	7.4164	8.23167	6.83242	4.84589	8.20962	11.1592	5.67216	13.2139	7.74858	10.3918	10.369	10.2454	7.75551	10.7971	8.05814	13.7372	9.29935	226.406
evm.TU.Contig16.218	157	139	141	241	307	203	220	197	212	141	214	198	144	141	108	191	150	241	207	288	221	149	176	99	6.46229	5.22271	5.2907	8.47139	9.14424	8.64625	7.36618	7.27712	7.36472	5.22354	7.79312	6.92821	5.04266	5.27051	4.10267	6.96647	5.40649	8.63235	7.79777	10.8108	8.24281	5.50057	6.43258	3.79187	126.191
evm.TU.Contig694.140	64	63	44	124	156	103	254	113	203	61	80	96	364	242	192	186	98	94	451	254	347	105	141	308	2.56587	2.30563	1.6081	4.24548	4.52586	4.27303	8.28362	4.06573	6.86884	2.20112	2.83762	3.27186	12.4156	8.81081	7.10414	6.60783	3.44047	3.27949	16.5479	9.2868	12.6061	3.77553	5.01948	11.4904	254.582
evm.TU.Contig616.12	133	117	123	264	318	145	207	189	140	137	209	154	106	189	141	188	134	199	142	152	122	152	148	143	20.0108	16.0692	16.8704	33.921	34.6228	22.5749	25.3347	25.52	17.7777	18.5521	27.8209	19.6971	13.5684	25.8239	19.5789	25.0648	17.6545	26.055	19.5531	20.8562	16.633	20.5112	19.7725	20.0207	141.251
evm.TU.Contig39.62	116	131	131	150	256	106	207	128	176	155	161	131	214	189	186	161	111	130	142	188	145	133	151	147	5.36736	5.5331	5.52562	5.92714	8.57166	5.0752	7.79122	5.31519	6.87304	6.45496	6.59082	5.1528	8.42417	7.94166	7.94277	6.60117	4.49742	5.23445	6.01318	7.93303	6.07949	5.51937	6.20391	6.32923	189.524
evm.TU.Contig480.479	43	137	26	114	128	55	160	74	143	249	43	360	124	8	371	57	148	154	148	170	117	230	242	113	1.8945	5.50988	1.04426	4.28926	4.08093	2.50746	5.73429	2.92594	5.31737	9.87382	1.67612	13.4834	4.64793	0.320084	15.0854	2.22533	5.70987	5.90436	5.96763	6.83053	4.67099	9.08845	9.46734	4.63272	166.084
evm.TU.Contig616.11	131	126	121	133	203	179	166	116	136	134	168	164	130	170	91	170	169	120	94	166	115	151	114	107	21.6221	18.9841	18.2062	18.7469	24.2462	30.572	22.2878	17.1827	18.9452	19.9063	24.5327	23.0112	18.2549	25.4813	13.8619	24.8638	24.4259	17.2358	14.1993	24.9869	17.1997	22.3531	16.7077	16.4339	125.53
evm.TU.Contig860.64	110	126	149	153	232	164	188	114	151	134	124	84	133	102	122	181	99	113	180	228	172	81	108	104	5.69765	5.95755	7.03552	6.76776	8.69587	8.79005	7.92124	5.29924	6.60105	6.24693	5.68245	3.69872	5.86091	4.79788	5.83202	8.30756	4.4903	5.09338	8.53274	10.77	8.07286	3.7629	4.96721	5.01265	114.956
evm.TU.Contig14.269	227	161	188	125	161	44	193	148	196	217	93	72	77	44	75	83	105	79	172	109	123	98	76	97	19.0898	12.3593	14.4125	8.97709	9.79768	3.82888	13.2028	11.1697	13.9112	16.4246	6.9194	5.14726	5.50905	3.36027	5.82093	6.18508	7.73217	5.78132	13.2378	8.3595	9.37295	7.39156	5.67511	7.59063	63.1656
evm.TU.Contig555.182	116	118	141	66	123	55	158	162	148	98	71	106	105	114	123	78	91	110	124	157	140	81	86	91	4.22669	3.92481	4.68347	2.0537	3.24317	2.07372	4.68308	5.29741	4.55132	3.21386	2.28882	3.28335	3.25493	3.77219	4.13622	2.51842	2.90349	3.48787	4.13501	5.21699	4.62239	2.64705	2.78244	3.08542	110.607
evm.TU.Contig28.336	28	76	77	237	234	183	132	181	133	118	143	71	51	58	34	66	49	80	64	197	121	107	112	76	1.37925	3.41737	3.45766	9.96973	8.34108	9.32782	5.28921	8.00146	5.52929	5.23149	6.23205	2.97311	2.1373	2.59453	1.54568	2.88085	2.11358	3.42925	2.88521	8.84971	5.4009	4.72719	4.89878	3.4836	45.8609
evm.TU.Contig154.653	87	109	91	186	224	48	105	101	105	140	185	108	65	43	57	76	73	29	119	152	56	176	130	113	6.22718	7.12186	5.93773	11.3694	11.6023	3.55515	6.11356	6.48784	6.34301	9.01902	11.7153	6.57151	3.95819	2.79504	3.76533	4.82034	4.57543	1.80632	7.79529	9.92189	3.63209	11.2985	8.2623	7.5263	53.0791
evm.TU.Contig201.50	143	128	214	74	167	63	185	122	139	120	90	56	81	92	72	70	101	93	67	105	65	81	94	35	5.04965	4.126	6.88884	2.23156	4.26741	2.30203	5.3141	3.86626	4.1426	3.81387	2.81176	1.68106	2.43344	2.95026	2.34646	2.19036	3.12309	2.85781	2.16528	3.38137	2.07986	2.56534	2.9474	1.15007	78.8917
evm.TU.Contig66.729	22	42	71	92	209	84	78	143	79	45	56	51	127	120	63	166	86	326	115	124	63	79	84	91	0.705869	1.23011	2.07667	2.52081	4.85255	2.78885	2.03577	4.1176	2.13925	1.29949	1.58965	1.39104	3.4667	3.49647	1.86551	4.71956	2.41622	9.10215	3.37686	3.62829	1.83163	2.27333	2.39313	2.7169	98.9717
evm.TU.Contig180.19	53	157	10	5	7	1	28	20	34	294	6	299	238	0	397	13	113	107	31	21	34	77	234	90	2.2187	5.99952	0.381619	0.178749	0.212052	0.0433179	0.953484	0.751379	1.20125	11.0772	0.222221	10.6405	8.47638	0	15.338	0.482235	4.14227	3.89791	1.18768	0.801716	1.28973	2.891	8.6981	3.50587	207.176
evm.TU.Contig906.67	25	15	17	94	115	26	26	69	32	28	77	49	229	190	188	186	36	75	145	165	93	64	154	118	0.77768	0.425938	0.482078	2.49712	2.5887	0.836911	0.657911	1.92627	0.840126	0.783931	2.11915	1.29576	6.06048	5.36737	5.39728	5.12704	0.98062	2.03024	4.12803	4.68084	2.62144	1.78557	4.25371	3.41565	195.113
evm.TU.Contig96.76	47	52	40	79	62	33	43	28	88	71	76	126	104	63	73	39	57	30	47	87	90	51	88	174	6.49693	6.56158	5.04055	9.32585	6.2019	4.7203	4.83517	3.47356	10.2666	8.8334	9.29469	14.8064	12.2308	7.90857	9.313	4.77714	6.89958	3.60875	5.94596	10.9675	11.2733	6.32289	10.8014	22.3816	76.892
evm.TU.Contig437.118	17	27	21	30	40	11	43	26	54	26	42	157	48	22	61	32	51	65	56	83	97	85	131	167	1.13024	1.63863	1.27276	1.70331	1.92444	0.756761	2.32553	1.55132	3.03004	1.5558	2.47048	8.8734	2.71502	1.32828	3.74289	1.88523	2.96913	3.76062	3.4074	5.03243	5.84372	5.06845	7.73354	10.3316	42.4426
evm.TU.Contig394.397	93	80	101	56	85	18	59	41	47	77	62	53	72	71	105	43	31	43	28	25	33	26	49	46	6.85634	5.38386	6.78794	3.52572	4.53472	1.37318	3.53829	2.71269	2.92443	5.10927	4.04401	3.32165	4.51599	4.75351	7.14422	2.80912	2.00128	2.75869	1.88921	1.68085	2.20455	1.71917	3.20768	3.15572	80.5175
evm.TU.Contig215.52	40	39	54	62	89	42	77	56	60	34	53	53	48	72	31	54	49	68	47	55	30	57	39	42	5.56408	4.95214	6.84753	7.36506	8.95872	6.04544	8.71278	6.99082	7.04398	4.25668	6.52259	6.26727	5.68049	9.09521	3.97971	6.6561	5.96852	8.23128	5.98335	6.9771	3.78139	7.11121	4.81708	5.43643	48.4537
evm.TU.Contig172.22	40	66	49	11	23	6	23	27	39	39	32	34	39	19	49	23	33	56	56	27	35	59	74	63	1.2197	1.83709	1.36206	0.286442	0.507508	0.189317	0.570497	0.738862	1.00367	1.07033	0.863284	0.881335	1.01174	0.52613	1.37894	0.62146	0.881139	1.48596	1.56277	0.750819	0.967069	1.61354	2.0036	1.78758	34.6579
evm.TU.Contig66.995	11	25	37	37	68	67	17	81	20	21	53	16	35	19	11	38	38	114	18	40	29	23	38	63	0.476105	0.987744	1.45988	1.36761	2.12981	3.00075	0.598537	3.14631	0.730589	0.818065	2.02953	0.588706	1.28881	0.74681	0.439399	1.45742	1.44023	4.29378	0.71301	1.57888	1.13738	0.892838	1.46042	2.53735	20.5736
evm.TU.Contig555.514	2	9	13	34	65	65	41	58	62	22	26	32	6	16	14	36	48	91	24	90	26	31	55	13	0.133103	0.546756	0.788691	1.93235	3.13035	4.47626	2.21959	3.46411	3.48243	1.31777	1.53088	1.8104	0.339718	0.966993	0.859886	2.12301	2.79728	5.27015	1.46178	5.46233	1.56793	1.85035	3.25016	0.805065	11.7463
evm.TU.Contig555.122	17	16	10	146	75	10	63	56	23	19	30	31	16	15	63	35	14	24	47	46	43	13	30	16	0.710761	0.610646	0.381138	5.21289	2.26913	0.432633	2.14263	2.10121	0.811589	0.71497	1.1097	1.10181	0.569122	0.569525	2.43093	1.29669	0.512555	0.873195	1.7984	1.75393	1.62907	0.487476	1.11374	0.622481	31.0659
evm.TU.Contig14.207	19	28	42	33	45	15	42	25	29	30	28	22	27	26	24	28	42	34	16	16	19	25	35	29	0.556838	0.74908	1.1221	0.825924	0.954356	0.454895	1.00128	0.657539	0.71731	0.791327	0.726013	0.548109	0.673209	0.691983	0.649147	0.727153	1.07786	0.867121	0.42915	0.427636	0.504575	0.657129	0.910813	0.790869	24.7886
evm.TU.Contig67.30	5	65	23	40	49	17	22	8	12	12	48	23	10	6	6	25	22	10	12	27	15	9	6	8	0.28139	3.33923	1.17998	1.92242	1.99552	0.989992	1.00715	0.404049	0.569971	0.607825	2.38996	1.10036	0.478794	0.306645	0.311635	1.24672	1.08417	0.489737	0.618063	1.38574	0.764937	0.454272	0.29983	0.418947	7.02986
evm.TU.Contig164.25	6	6	8	4	6	12	3	8	4	1	5	5	22	36	4	34	6	6	26	33	20	2	12	7	0.211087	0.192689	0.256571	0.120177	0.152751	0.436854	0.0858547	0.252584	0.118769	0.0316643	0.155629	0.149537	0.658482	1.15016	0.129875	1.05994	0.184841	0.18369	0.837138	1.05877	0.637583	0.0631067	0.374867	0.22916	19.7229
evm.TU.Contig12.430	0	2	2	3	2	4	1	3	1	4	3	9	33	16	29	10	7	20	23	5	3	10	34	32	0	0.225581	0.225276	0.316555	0.178826	0.511425	0.10051	0.332664	0.104282	0.444833	0.327952	0.945342	3.46898	1.79533	3.30698	1.09489	0.757379	2.15047	2.60087	0.563412	0.335889	1.10819	3.73029	3.67924	25.0837
evm.TU.Contig67.31	2	0	4	14	18	6	7	5	2	6	9	3	1	0	0	6	0	4	0	3	1	2	3	2	0.167555	0	0.305488	1.00163	1.09124	0.520143	0.477043	0.375927	0.141413	0.452415	0.667083	0.213657	0.071275	0	0	0.445421	0	0.291616	0	0.229206	0.0759142	0.150277	0.223169	0.155915	0.305956
evm.TU.Contig363.10	6	1	1	4	36	3	1	2	0	1	6	5	1	2	2	2	0	7	0	4	1	4	0	0	0.160853	0.0244721	0.024439	0.0915772	0.698396	0.0832229	0.0218077	0.0481186	0	0.0241288	0.142311	0.11395	0.022808	0.0486915	0.0494838	0.0475115	0	0.163305	0	0.0977947	0.0242925	0.0961771	0	0	1.62939
evm.TU.Contig296.65	3	3	2	4	0	1	6	1	2	2	4	6	4	1	0	1	1	1	2	5	3	1	2	6	0.172491	0.157457	0.104829	0.196407	0	0.0594964	0.280627	0.0516003	0.0970532	0.103499	0.203478	0.293269	0.195667	0.0522147	0	0.0509493	0.0503481	0.0500347	0.105242	0.262177	0.156302	0.0515681	0.102108	0.321017	1.54711
evm.TU.Contig44.177	1	2	0	3	0	0	2	2	0	0	1	7	0	0	0	1	1	1	0	0	0	0	0	0	0.0338702	0.0618361	0	0.086774	0	0	0.0551036	0.060793	0	0	0.029966	0.201551	0	0	0	0.030013	0.0296589	0.0294742	0	0	0	0	0	0	0
evm.TU.Contig22.33	0	1	1	0	5	0	2	0	0	1	0	2	0	0	2	0	0	0	0	0	0	0	0	0	0	0.0617415	0.0616581	0	0.244723	0	0.110039	0	0	0.0608754	0	0.114996	0	0	0.124844	0	0	0	0	0	0	0	0	0	0.676869
[truncated: 28 more columns]

## Sheet: ARF
gene_id	CK14d_1_count	CK14d_2_count	CK14d_3_count	CK1d_1_count	CK1d_2_count	CK1d_3_count	CK3d_1_count	CK3d_2_count	CK3d_3_count	CK7d_1_count	CK7d_2_count	CK7d_3_count	GA14d_1_count	GA14d_2_count	GA14d_3_count	GA1d_1_count	GA1d_2_count	GA1d_3_count	GA3d_1_count	GA3d_2_count	GA3d_3_count	GA7d_1_count	GA7d_2_count	GA7d_3_count	CK14d_1_fpkm	CK14d_2_fpkm	CK14d_3_fpkm	CK1d_1_fpkm	CK1d_2_fpkm	CK1d_3_fpkm	CK3d_1_fpkm	CK3d_2_fpkm	CK3d_3_fpkm	CK7d_1_fpkm	CK7d_2_fpkm	CK7d_3_fpkm	GA14d_1_fpkm	GA14d_2_fpkm	GA14d_3_fpkm	GA1d_1_fpkm	GA1d_2_fpkm	GA1d_3_fpkm	GA3d_1_fpkm	GA3d_2_fpkm	GA3d_3_fpkm	GA7d_1_fpkm	GA7d_2_fpkm	GA7d_3_fpkm	GA14dvsCK14d_GA14d
evm.TU.Contig254.6	3799	4254	4349	3936	3653	2268	3629	4083	3540	4112	4028	4815	4049	3115	5287	3304	4190	4361	3409	3551	2817	3428	4488	3338	78.3556	80.0927	81.7706	69.3277	54.5221	48.4048	60.8864	75.5765	61.6223	76.3331	73.5023	84.424	71.0492	58.3453	100.639	60.3856	75.675	78.273	64.3489	66.7929	52.6483	63.4127	82.1939	64.0646	4035.14
evm.TU.Contig16.348	2669	2967	3281	3985	3842	3447	3184	3160	3132	3278	3797	3380	4092	5143	3585	3738	3171	3548	4149	3156	3766	3132	3669	3672	33.0891	33.5775	37.0808	42.1905	34.468	44.2203	32.1101	35.1584	32.7711	36.5766	41.6473	35.6223	43.1601	57.9027	41.0186	41.0646	34.4246	38.2776	47.0752	35.6822	42.307	34.8251	40.3896	42.3613	4127.9
evm.TU.Contig370.49	2732	3094	3572	3249	3538	2146	2932	3234	2941	3121	2808	2811	4008	3528	4613	2659	3260	3103	3575	2891	3081	2887	2851	3469	62.8328	64.9562	74.8901	63.8126	58.8825	51.0717	54.8533	66.7502	57.0867	64.6039	57.1365	54.9586	78.4232	73.6854	97.9142	54.1897	65.654	62.1031	75.2481	60.6363	64.2087	59.5508	58.2223	74.2406	3928.01
evm.TU.Contig16.109	2678	2821	3079	2080	2665	1647	2592	2736	2576	2738	2774	2977	3028	2542	3453	2595	2905	2997	2473	2360	2303	2874	3020	2648	50.3656	48.4307	52.7886	33.407	36.2696	32.0525	39.6544	46.1791	40.8887	46.3464	46.1573	47.5961	48.4496	43.4156	59.9344	43.2467	47.8417	49.0496	42.5658	40.4775	39.2476	48.478	50.4331	46.3417	2916.83
evm.TU.Contig45.191	3251	2910	3695	2419	3455	1611	2222	1704	1835	2281	2821	2349	3207	2925	3320	1879	2031	1893	1999	1616	1256	1904	2490	1894	84.9918	69.4461	88.0606	54.0066	65.3628	43.5813	47.2538	39.9794	40.4883	53.6716	65.2491	52.205	71.3296	69.4437	80.1041	43.5291	46.4951	43.0661	47.8285	38.5283	29.7541	44.6439	57.8023	46.0756	3050.4
evm.TU.Contig600.193	1517	1546	1942	2672	2438	1216	1438	1671	1430	2004	1531	1668	2315	1908	2997	1301	1549	1731	1760	2087	1636	1913	1630	1854	23.0491	21.4424	26.8983	34.6702	26.8056	19.1182	17.773	22.7851	18.3374	27.4047	20.5804	21.5444	29.9247	26.3265	42.0254	17.5161	20.609	22.8871	24.4734	28.9181	22.5241	26.0687	21.9908	26.2126	2339.4
evm.TU.Contig583.86	2202	2324	1676	1464	2046	482	2463	1927	2359	2195	1350	1321	1709	903	2189	1158	2131	1646	2521	1524	1278	1546	2086	1190	39.0972	37.6669	27.1275	22.1984	26.288	8.85565	35.5734	30.7055	35.3501	35.077	21.2067	19.9389	25.8156	14.5601	35.87	18.2192	33.1321	25.4322	40.9652	24.677	20.5616	24.6192	32.8873	19.661	1555.64
evm.TU.Contig259.91	1438	1407	1825	1593	1765	990	1511	1297	1677	1776	1476	1345	1827	1627	1790	1314	1112	1059	2238	1777	1700	1462	1605	1487	26.6147	23.7712	30.7916	25.1785	23.639	18.9602	22.7489	21.5431	26.1957	29.5845	24.1691	21.1619	28.7682	27.3462	30.5754	21.5502	18.0221	17.0563	37.9085	29.9936	28.5107	24.2686	26.3769	25.6097	1690.76
evm.TU.Contig21.408	1707	1734	2062	1653	2234	1001	1437	1057	1136	1654	1751	1424	2038	2096	1566	1356	1186	1260	1951	1253	1253	1326	1239	1183	30.5043	28.2859	33.591	25.2261	28.889	18.51	20.8889	16.9515	17.1332	26.6024	27.6837	21.6325	30.9843	34.0146	25.8271	21.4723	18.5588	19.594	31.9078	20.42	20.2896	21.2523	19.66	19.6717	1831.13
evm.TU.Contig694.19	1286	1360	1466	1811	1729	1216	1620	1241	1598	1313	1530	1407	1335	1586	1528	1404	1314	1526	1530	1199	1146	1228	1557	974	26.3034	25.3924	27.3346	31.633	25.5911	25.7365	26.9537	22.7798	27.5855	24.171	27.6868	24.4644	23.2307	29.4592	28.8437	25.4466	23.5344	27.1613	28.6402	22.365	21.2399	22.5271	28.2778	18.5379	1438.31
evm.TU.Contig154.226	1550	1512	1860	1636	1922	1253	1156	971	851	1485	1443	1218	1618	1895	1572	1257	973	1436	1046	973	949	861	1099	1031	34.8627	31.0439	38.1373	31.4242	31.2828	29.1626	21.1505	19.6	16.1545	30.0618	28.7149	23.2888	30.9613	38.7067	32.6316	25.0529	19.1637	28.1067	21.5315	19.9582	19.3416	17.3687	21.9489	21.5784	1639.68
evm.TU.Contig81.875	865	819	615	443	695	371	1044	688	869	710	378	538	713	564	677	486	619	725	703	731	534	492	368	320	21.5768	18.6487	13.9847	9.4368	12.5452	9.57611	21.1838	15.4016	18.2946	15.94	8.34205	11.4083	15.1311	12.776	15.5853	10.7423	13.5207	15.7374	16.0487	16.629	12.07	11.007	8.15087	7.42765	629.598
evm.TU.Contig139.289	538	637	997	547	554	425	493	612	478	416	289	281	739	879	688	405	448	457	915	389	522	391	419	489	8.87107	9.588	14.9864	7.70251	6.61037	7.2515	6.61262	9.05632	6.65205	6.17371	4.21602	3.93885	10.3669	13.1622	10.4698	5.91754	6.46859	6.55745	13.8079	5.84955	7.79939	5.78237	6.1347	7.50298	743.11
evm.TU.Contig207.84	712	667	677	436	436	383	420	387	342	567	426	622	918	504	627	382	611	481	420	411	366	572	688	515	26.3777	22.5568	22.864	13.7941	11.6887	14.6825	12.6572	12.8669	10.6934	18.9059	13.9629	19.5892	28.9341	16.9564	21.4378	12.5404	19.8214	15.507	14.2403	13.886	12.2867	19.0058	22.6324	17.7539	656.001
evm.TU.Contig481.18_evm.TU.Contig481.19	490	595	589	492	749	272	735	849	515	490	565	378	418	325	281	316	287	354	432	465	484	406	315	286	9.70227	10.7545	10.6316	8.31943	10.732	5.57303	11.8385	15.0866	8.60634	8.73238	9.89776	6.36265	7.04149	5.84396	5.135	5.54443	4.97619	6.09966	7.82843	8.39671	8.68399	7.21005	5.53826	5.26956	328.057
evm.TU.Contig180.394	426	321	392	466	668	287	368	435	399	340	378	323	371	318	209	578	382	541	563	529	551	401	307	381	12.3216	8.47536	10.336	11.5105	13.9816	8.58984	8.65843	11.2916	9.74014	8.85108	9.673	7.942	9.12942	8.3528	5.57906	14.8142	9.67518	13.617	14.9032	13.9538	14.4413	10.4025	7.88465	10.2545	287.046
evm.TU.Contig264.285	539	588	703	237	310	106	402	347	600	508	359	372	428	800	600	320	263	412	522	317	306	234	311	338	14.6392	14.5781	17.4057	5.49702	6.09274	2.97906	8.88152	8.45793	13.7535	12.418	8.62648	8.58896	9.8897	19.7317	15.0396	7.70142	6.25492	9.73757	12.9751	7.85175	7.53089	5.70006	7.50023	8.54232	592.636
evm.TU.Contig81.382	456	389	318	295	376	174	456	221	374	442	202	380	387	234	512	284	415	457	314	459	303	250	348	260	13.2066	10.2842	8.39578	7.29625	7.8802	5.2146	10.743	5.74415	9.14181	11.5215	5.17594	9.35577	9.53561	6.15445	13.6853	7.28849	10.5248	11.5178	8.32281	12.1232	7.95181	6.49384	8.94936	7.00698	367.332
evm.TU.Contig766.80	333	422	538	328	328	246	207	225	194	334	350	232	392	620	252	295	224	303	362	233	323	223	227	260	6.84483	7.91818	10.0811	5.75762	4.87882	5.23237	3.46116	4.15057	3.36553	6.17908	6.36498	4.05392	6.85512	11.5733	4.78052	5.3732	4.03184	5.41984	6.80989	4.3677	6.01613	4.1111	4.14314	4.97305	405.655
evm.TU.Contig565.34	197	236	331	238	311	167	406	310	191	228	241	149	318	275	133	176	152	244	303	203	228	153	138	114	4.69852	5.13808	7.19664	4.84755	5.36757	4.12151	7.87687	6.63533	3.84469	4.89428	5.08537	3.021	6.45257	5.95627	2.92754	3.71963	3.1745	5.06419	6.61379	4.41539	4.92749	3.27281	2.92253	2.53006	231.209
evm.TU.Contig583.48	200	187	159	75	108	95	130	135	88	108	101	147	302	227	176	99	123	180	127	91	120	161	132	129	11.8591	10.1218	8.5946	3.79782	4.63413	5.82895	6.27044	7.18393	4.40391	5.76374	5.29851	7.40983	15.2349	12.2235	9.63143	5.20175	6.38652	9.28794	6.8919	4.92087	6.44762	8.56215	6.94995	7.11775	225.348
evm.TU.Contig555.175	124	113	183	140	158	65	220	260	148	118	136	101	73	72	40	105	91	126	60	61	67	56	38	72	2.58486	2.15025	3.47755	2.49226	2.38339	1.40208	3.73053	4.86402	2.60382	2.21389	2.50822	1.7898	1.29464	1.363	0.769541	1.93953	1.66109	2.28566	1.14467	1.15964	1.26557	1.04698	0.703371	1.39662	59.1485
evm.TU.Contig477.240	99	106	128	40	90	15	103	76	40	87	74	58	46	24	17	42	35	72	23	20	52	54	34	16	3.11023	3.03989	3.66585	1.07317	2.04608	0.487634	2.63225	2.14278	1.0606	2.46001	2.05684	1.54901	1.22949	0.684725	0.492905	1.16923	0.962861	1.96841	0.661301	0.573016	1.48033	1.52155	0.948468	0.467745	27.5861
[truncated: 28 more columns]

## Sheet: AP2
gene_id	CK14d_1_count	CK14d_2_count	CK14d_3_count	CK1d_1_count	CK1d_2_count	CK1d_3_count	CK3d_1_count	CK3d_2_count	CK3d_3_count	CK7d_1_count	CK7d_2_count	CK7d_3_count	GA14d_1_count	GA14d_2_count	GA14d_3_count	GA1d_1_count	GA1d_2_count	GA1d_3_count	GA3d_1_count	GA3d_2_count	GA3d_3_count	GA7d_1_count	GA7d_2_count	GA7d_3_count	CK14d_1_fpkm	CK14d_2_fpkm	CK14d_3_fpkm	CK1d_1_fpkm	CK1d_2_fpkm	CK1d_3_fpkm	CK3d_1_fpkm	CK3d_2_fpkm	CK3d_3_fpkm	CK7d_1_fpkm	CK7d_2_fpkm	CK7d_3_fpkm	GA14d_1_fpkm	GA14d_2_fpkm	GA14d_3_fpkm	GA1d_1_fpkm	GA1d_2_fpkm	GA1d_3_fpkm	GA3d_1_fpkm	GA3d_2_fpkm	GA3d_3_fpkm	GA7d_1_fpkm	GA7d_2_fpkm	GA7d_3_fpkm	GA14dvsCK14d_GA14d
evm.TU.Contig55.211	4848	4873	5662	7937	7250	8312	6774	7984	7777	5723	5510	5933	7304	6516	8397	6554	6694	8149	8303	8571	7710	5328	5579	5497	131.028	120.224	139.501	183.192	141.795	232.461	148.929	193.654	177.397	139.214	131.754	136.315	167.947	159.929	209.45	156.964	158.425	191.659	205.376	211.257	188.821	129.152	133.888	138.247	7183.05
evm.TU.Contig967.79	4791	5598	5003	5086	4452	6475	7001	6051	8202	5120	4888	5740	6006	6139	7095	5577	5994	6031	7568	5684	6363	5595	5846	6023	252.896	269.739	240.743	229.268	170.057	353.672	300.614	286.649	365.401	243.246	228.275	257.571	269.72	294.28	345.641	260.861	277.058	277.033	365.604	273.621	304.351	264.882	274.007	295.842	6223.4
evm.TU.Contig394.3	3491	2928	2824	3084	6476	2891	2756	2179	3217	3302	5108	3521	5312	3887	3004	3102	2236	2998	3620	3171	3469	4440	4998	3703	163.814	125.42	120.802	123.586	219.903	140.377	105.2	91.7627	127.405	139.456	212.063	140.455	212.066	165.639	130.094	128.984	91.878	122.422	155.462	135.699	147.504	186.862	208.25	161.691	3898.5
evm.TU.Contig280.127	2113	3075	3138	6667	4653	4029	4052	3264	3728	3468	3739	3626	2120	1742	2657	4092	3618	4640	2931	3224	3263	3450	2761	2724	62.9551	83.6318	85.2298	169.634	100.32	124.215	98.205	87.2747	93.7435	92.9972	98.5594	91.8393	53.7376	47.1332	73.06	108.034	94.3925	120.303	79.921	87.6003	88.0937	92.1904	73.0439	75.5213	2111.01
evm.TU.Contig12.225	3453	3189	3736	4232	3075	3839	2102	1457	1498	1997	2220	1931	2689	4963	2892	2848	2138	2668	2376	2184	2102	1535	1880	1574	108.842	91.759	107.353	113.919	70.1402	125.217	53.8971	41.216	39.8515	56.6548	61.9104	51.7429	72.111	142.066	84.1307	79.5485	59.0126	73.1831	68.5424	62.7814	60.0384	43.3953	52.6191	46.1674	3405.92
evm.TU.Contig197.4	2876	3492	3155	2619	4009	1403	2189	2265	2859	2305	3121	2184	3150	2782	1352	2414	1994	2309	2007	2725	1870	1640	1542	1728	94.3289	104.55	94.3327	73.3571	95.1512	47.6166	58.4029	66.67	79.1414	68.0434	90.565	60.8944	87.8977	82.8628	40.925	70.1594	57.2689	65.903	60.2444	81.5082	55.5769	48.2431	44.9082	52.7389	2320.7
evm.TU.Contig583.133	1089	881	1227	1246	1800	961	1916	907	1139	1042	1133	1982	3456	1749	2020	2721	2020	2112	2746	1833	2389	1082	1216	3781	26.4387	19.5246	27.1559	25.8334	31.6233	24.1424	37.8391	19.7618	23.3383	22.7687	24.3362	40.9058	71.3833	38.561	45.2606	58.5374	42.9439	44.6202	61.0135	40.5839	52.5563	23.56	26.2139	85.4181	2306.44
evm.TU.Contig480.235	1309	1618	1760	2233	2554	1762	1857	1484	1801	1458	1945	1660	1586	1739	1890	1803	1515	1680	1683	2076	1432	1540	1794	1723	56.6565	63.9268	69.4431	82.5371	79.9932	78.9152	65.3814	57.6435	65.7896	56.7971	74.4801	61.0783	58.4014	68.3528	75.4967	69.1509	57.4195	63.2767	66.6664	81.9437	56.1628	59.7813	68.9474	69.3946	1687.08
evm.TU.Contig139.206	1170	1354	1672	1858	1890	1599	1578	1727	1528	1342	1903	1321	1269	1338	1446	1537	1335	1609	1620	2006	1482	1458	1352	1458	42.9378	45.3593	55.9367	58.2304	50.1924	60.7221	47.1078	56.879	47.3272	44.3267	61.7879	41.2122	39.621	44.5919	48.9754	49.9827	42.9015	51.3848	54.4104	67.1372	49.2831	47.9895	44.0571	49.79	1310.19
evm.TU.Contig81.334	1376	1377	1185	1576	2263	1026	2115	1237	2029	1572	1118	1577	1020	705	1574	1300	1373	1299	1504	1662	1799	1553	1304	1090	52.9582	48.3775	41.5757	51.799	63.0263	40.8608	66.2152	42.7258	65.9068	54.4536	38.0686	51.5959	33.3984	24.6406	55.9082	44.3354	46.2725	43.506	52.9756	58.3343	62.7397	53.6069	44.5634	39.0366	1072.69
evm.TU.Contig96.391	1477	1746	2115	1514	1750	880	2757	1473	2011	3023	1713	2159	200	489	1191	751	618	1695	787	988	644	1891	625	694	75.3857	81.3481	98.407	65.9911	64.6352	46.4768	114.466	67.4711	86.6272	138.869	77.3529	93.6764	8.68459	22.6654	56.1018	33.9657	27.6207	75.2841	36.7618	45.988	29.7845	86.5635	28.3253	32.9609	622.352
evm.TU.Contig447.27	332	379	1095	1551	2442	817	571	585	595	316	857	1011	3552	2466	1980	1806	793	1253	1003	724	1502	1308	958	1719	18.8926	19.6873	56.8034	75.373	100.559	48.1083	26.4315	29.8755	28.5762	16.1845	43.1464	48.9073	171.964	127.436	103.986	91.0675	39.5152	62.0482	52.2357	37.5725	77.4497	66.7569	48.4066	91.0249	2554.07
evm.TU.Contig84.396	795	1101	1104	1586	1712	707	1432	1005	1843	1516	1381	1730	158	189	694	1014	452	1148	1345	1107	670	2091	974	723	30.6862	38.7934	38.8465	52.2793	47.8192	28.2384	44.9626	34.8136	60.0392	52.6665	47.1607	56.7664	5.18852	6.62498	24.7225	34.6822	15.2775	38.5605	47.5129	38.9675	23.434	72.3877	33.3826	25.9684	344.315
evm.TU.Contig180.53	1096	1493	1409	1510	1276	1617	877	655	428	872	1774	897	798	2001	569	1246	1003	1244	1159	572	929	821	964	718	64.0153	79.6027	75.0225	75.3185	53.932	97.7301	41.6683	34.3337	21.0985	45.8405	91.6723	44.5384	39.654	106.137	30.672	64.4887	51.2994	63.2294	61.9541	30.4683	49.1683	43.0082	49.9961	39.0237	1083.61
evm.TU.Contig96.392	1591	3460	2308	1175	1563	474	1271	1131	934	1072	915	892	394	1142	640	876	457	621	365	648	516	682	307	377	44.4299	88.2015	58.7555	28.0217	31.5854	13.6971	28.8724	28.3449	22.0133	26.9438	22.6067	21.1758	9.36079	28.9613	16.4946	21.6771	11.1753	15.0911	9.3285	16.5029	13.0572	17.0815	7.61254	9.79665	706.333
evm.TU.Contig471.90	1608	1304	2294	1060	263	705	550	166	95	1831	1027	1077	701	2059	2132	399	688	707	80	106	172	503	256	242	70.0548	51.859	91.1071	39.4374	8.29144	31.7823	19.4916	6.49032	3.49309	71.7959	39.5852	39.8875	25.9825	81.462	85.7226	15.4034	26.2469	26.8038	3.18974	4.2115	6.79011	19.6542	9.90325	9.81066	1601.66
evm.TU.Contig12.424	595	733	648	976	1461	359	876	507	647	954	700	1040	952	535	1429	692	718	795	642	521	449	915	869	599	11.6252	13.0732	11.5416	16.2849	20.6565	7.25811	13.9226	8.88993	10.669	16.7761	12.1002	17.2737	15.8246	9.49259	25.7675	11.9807	12.2842	13.5169	11.4798	9.28326	7.94926	16.0339	15.0761	10.8904	947.849
evm.TU.Contig35.216	314	543	619	1867	714	911	1367	580	682	546	1171	986	65	363	206	1232	1308	1066	681	357	558	563	417	146	10.4959	16.5686	18.8621	53.295	17.2708	31.5104	37.17	17.3991	19.2402	16.4264	34.6305	28.018	1.84848	11.0191	6.35499	36.4917	38.2857	31.008	20.833	10.8827	16.9014	16.8785	12.3769	4.54125	206.956
evm.TU.Contig79.51	1053	1431	1084	468	1130	301	523	437	693	867	1496	858	920	288	504	515	678	676	340	510	345	751	671	511	46.2704	57.3996	43.4221	17.5619	35.9315	13.6863	18.6943	17.2331	25.7005	34.2889	58.1591	32.0502	34.3933	11.4925	20.4391	20.0528	26.0881	25.8492	13.6731	20.4373	13.737	29.5971	26.1808	20.8942	545.156
evm.TU.Contig184.822	340	462	508	1253	884	318	416	752	449	606	555	817	302	439	367	1011	825	1245	582	437	598	946	777	874	20.4344	25.3466	27.8326	64.3109	38.4466	19.7767	20.338	40.5608	22.7752	32.7804	29.5112	41.7421	15.4419	23.9604	20.3566	53.8426	43.4184	65.1144	32.0125	23.9521	32.5672	50.9928	41.4658	48.8793	358.525
evm.TU.Contig84.463	689	1269	744	842	544	407	634	681	557	443	864	850	330	848	337	761	591	720	709	299	734	645	375	628	21.5237	36.1871	21.1874	22.4626	12.2976	13.1564	16.1109	19.092	14.6854	12.4555	23.8793	22.5728	8.77045	24.0569	9.71591	21.0656	16.1667	19.5729	20.2701	8.51819	20.7773	18.0714	10.4019	18.2553	489.161
evm.TU.Contig264.249	493	767	723	358	358	481	788	560	1153	633	585	654	258	155	620	299	661	1358	781	998	1050	476	256	521	22.482	31.9285	30.0562	13.9419	11.8139	22.6975	29.2313	22.9183	44.3764	25.9807	23.6024	25.3534	10.0097	6.419	26.0938	12.0824	26.3954	53.8907	32.5952	41.5048	43.3885	19.4684	10.3661	22.1084	338.875
evm.TU.Contig63.533	521	652	592	333	339	272	723	310	560	809	532	941	504	343	621	595	794	658	492	319	419	1151	694	699	24.2591	27.7127	25.1284	13.2413	11.4224	13.1054	27.3847	12.954	22.0069	33.9035	21.9159	37.2474	19.9654	14.5037	26.6861	24.5497	32.3739	26.6617	20.966	13.5459	17.6786	48.067	28.6934	30.2862	475.256
evm.TU.Contig84.398	281	286	420	1057	505	1250	648	296	437	758	487	550	363	546	1118	567	343	656	432	456	281	826	585	351	12.5893	11.6965	17.1535	40.4411	16.3723	57.9498	23.6159	11.9013	16.5239	30.565	19.3035	20.9473	13.8361	22.2145	46.2269	22.5098	13.4564	25.5756	17.7131	18.6312	11.4077	33.1903	23.2723	14.6331	665.944
evm.TU.Contig84.397	579	1760	979	713	897	287	507	664	386	350	427	355	221	797	195	371	285	263	277	288	290	190	146	99	22.0664	61.2294	34.0128	23.2056	24.7382	11.3183	15.7179	22.7105	12.4158	12.0055	14.3977	11.5014	7.16566	27.5841	6.85873	12.5291	9.5112	8.72236	9.66154	10.0098	10.0149	6.49444	4.94074	3.51091	391.267
evm.TU.Contig27.29	486	512	562	531	745	161	690	421	584	547	430	460	423	317	439	404	442	572	449	368	263	488	333	350	12.4698	11.9919	13.1452	11.6351	13.8325	4.27459	14.4014	9.6942	12.6465	12.6319	9.76119	10.0334	9.23367	7.38634	10.3955	9.18538	9.93077	12.7716	10.5435	8.61093	6.1147	11.23	7.58671	8.35646	380.473
evm.TU.Contig555.523	304	349	354	613	1074	279	734	380	446	453	442	483	315	230	390	427	363	443	351	459	285	433	380	244	21.5501	22.5837	22.8763	37.1097	55.0938	20.4656	42.3258	24.175	26.6836	28.9024	27.721	29.1066	18.9975	14.8064	25.5151	26.8223	22.5331	27.3278	22.7718	29.6734	18.307	27.5295	23.9191	16.0952	302.721
evm.TU.Contig96.486	406	717	956	442	99	1006	402	139	200	576	438	374	221	902	361	157	245	415	73	99	202	228	195	99	17.9832	28.9904	38.6016	16.7191	3.1732	46.1087	14.4843	5.52537	7.47659	22.9626	17.1643	14.0825	8.32804	36.2822	14.7572	6.16215	9.50262	15.9961	2.95921	3.99902	8.10752	9.05753	7.66938	4.08043	481.392
evm.TU.Contig96.393	118	114	120	389	811	208	272	173	277	241	214	201	406	298	719	299	146	324	553	516	249	451	563	371	4.80927	4.24128	4.45847	13.5394	23.9189	8.77214	9.01777	6.32776	9.5282	8.84043	7.71653	6.96406	14.0778	11.0296	27.0447	10.7984	5.2106	11.4913	20.627	19.179	9.19588	16.4858	20.3747	14.0703	463.891
evm.TU.Contig66.1092	253	278	223	306	515	510	407	187	245	245	371	349	328	285	277	583	316	420	200	336	275	381	362	323	34.3292	34.4336	27.5838	35.4581	50.5676	71.6074	44.9231	22.7715	28.0571	29.9205	44.5377	40.2566	37.8641	35.1184	34.688	70.0977	37.5463	49.5927	24.8363	41.5778	33.8121	46.3664	43.6151	40.7827	286.235
evm.TU.Contig66.613	207	251	251	240	801	218	479	275	347	278	341	260	283	189	251	430	185	331	259	369	252	190	185	157	10.892	12.056	12.0397	10.7845	30.4994	11.8697	20.5024	12.986	15.4099	13.1656	15.8746	11.63	12.6688	9.0312	12.189	20.0492	8.52405	15.1562	12.4724	17.7069	12.0153	8.96655	8.64359	7.68719	232.633
evm.TU.Contig154.278	404	432	501	240	211	176	282	119	200	501	328	567	81	99	48	279	395	349	118	89	136	588	123	202	18.5125	18.0701	20.928	9.39173	6.99662	8.34528	10.5115	4.89369	7.73476	20.6624	13.2974	22.0869	3.15776	4.1197	2.02993	11.3287	15.8496	13.9166	4.94856	3.71922	5.64701	24.1655	5.00465	8.61322	73.0323
evm.TU.Contig66.991	258	349	338	216	456	47	531	280	329	319	273	301	187	100	230	214	307	293	174	145	106	331	305	196	8.55509	10.5639	10.2171	6.11659	10.9419	1.61268	14.3229	8.33238	9.20734	9.52039	8.009	8.48477	5.27542	3.01128	7.03864	6.28798	8.91416	8.45469	5.28041	4.38482	3.18498	9.84391	8.98029	6.04772	167.382
evm.TU.Contig766.29	244	297	207	270	406	203	373	260	297	201	272	236	187	152	144	302	290	386	431	345	272	235	142	125	6.99344	7.77055	5.40852	6.60869	8.42072	6.02063	8.69646	6.68776	7.18441	5.18509	6.89732	5.75019	4.55988	3.95632	3.80908	7.67009	7.27841	9.6275	11.3055	9.01776	7.06425	6.04093	3.61389	3.33382	155.087
evm.TU.Contig341.320	61	111	196	208	124	17	78	526	483	192	83	200	17	32	169	135	118	301	967	337	249	709	274	615	4.90006	8.13934	14.3527	14.2688	7.20802	1.41308	5.09682	37.9196	32.7456	13.8814	5.89876	13.6575	1.1618	2.33436	12.529	9.60944	8.30025	21.0409	71.0905	24.6877	18.1246	51.0803	19.5438	45.9704	72.7417
evm.TU.Contig531.30	143	314	228	728	227	156	313	345	152	142	290	288	36	202	117	404	369	282	336	156	231	173	163	126	7.52442	15.0821	10.9365	32.7129	8.64341	8.49388	13.3972	16.2915	6.75016	6.72487	13.5004	12.8824	1.61157	9.65239	5.68171	18.8369	17.002	12.9125	16.1804	7.48583	11.014	8.16428	7.6157	6.16933	115.914
evm.TU.Contig294.281	157	215	284	925	245	362	325	188	81	296	251	304	26	172	105	283	236	615	57	178	224	76	204	11	8.2742	10.3433	13.6443	41.6312	9.34361	19.7415	13.9329	8.89181	3.60284	14.0403	11.7034	13.6197	1.16576	8.23192	5.10707	13.2161	10.8912	28.205	2.74925	8.5551	10.6972	3.59232	9.54645	0.539448	99.0951
evm.TU.Contig421.260	15	36	91	205	59	33	33	784	387	126	67	197	18	32	146	293	74	194	873	510	292	410	308	441	0.718092	1.57321	3.97134	8.38095	2.04392	1.63473	1.28509	33.683	15.6363	5.42898	2.83775	8.01722	0.733115	1.39119	6.45057	12.4294	3.10211	8.08194	38.2487	22.2658	12.6668	17.6038	13.0926	19.6453	65.2637
evm.TU.Contig166.3	128	240	125	324	331	228	379	209	216	147	277	207	216	169	107	183	133	191	373	214	161	192	239	126	4.24015	7.25733	3.77475	9.16573	7.93453	7.81539	10.2128	6.21332	6.03891	4.38276	8.11823	5.82922	6.08745	5.08399	3.27123	5.37173	3.85798	5.50591	11.3082	6.46492	4.83274	5.70436	7.02999	3.88394	156.934
evm.TU.Contig797.149	205	274	353	34	109	11	122	97	109	357	130	368	278	167	358	115	145	156	92	67	82	384	330	512	11.0049	13.427	17.2749	1.5587	4.23431	0.611042	5.32753	4.67317	4.93848	17.2489	6.1743	16.7938	12.6966	8.14135	17.7367	5.47046	6.81614	7.28758	4.51996	3.2801	3.98881	18.4884	15.7302	25.5761	260.204
evm.TU.Contig318.20	0	0	7	742	61	1673	38	53	93	0	19	74	5	19	25	482	154	296	76	223	171	49	163	147	0	0	0.224857	22.3283	1.55544	61.0017	1.08923	1.67604	2.76578	0	0.592333	2.21668	0.149893	0.607998	0.813014	15.0502	4.75182	9.0765	2.45092	7.16614	5.46002	1.54858	5.10006	4.82003	16.133
evm.TU.Contig969.60	114	93	136	219	248	207	273	149	175	150	244	189	88	173	81	184	145	195	146	220	161	136	158	135	3.77261	2.80941	4.10283	6.18917	5.93898	7.08847	7.34908	4.42517	4.88775	4.46774	7.14395	5.31702	2.4776	5.19913	2.47388	5.3957	4.20187	5.61561	4.42185	6.63955	4.82792	4.03656	4.6428	4.15721	110.265
evm.TU.Contig531.31	53	87	106	335	241	83	306	281	166	57	174	148	66	179	46	335	124	149	271	285	225	40	76	42	2.16542	3.24474	3.94801	11.6886	7.12533	3.50904	10.17	10.3034	5.7241	2.09604	6.28964	5.1404	2.29414	6.64149	1.73452	12.1284	4.43634	5.29758	10.1332	10.6191	8.32999	1.46575	2.75718	1.59678	93.6287
evm.TU.Contig256.14	203	446	240	39	88	40	206	130	252	257	197	242	12	80	80	104	136	113	129	129	117	327	53	140	13.5917	27.2589	14.6486	2.22994	4.26367	2.7713	11.2196	7.81138	14.2401	15.4871	11.6696	13.7741	0.68355	4.86424	4.94339	6.17027	7.9736	6.58388	7.90462	7.87674	7.0984	19.6364	3.15094	8.72242	56.6088
evm.TU.Contig137.10	2	8	0	247	109	111	179	32	563	48	59	193	0	0	7	503	291	248	233	266	289	146	78	37	0.135688	0.495447	0	14.3107	5.35133	7.79257	9.87867	1.94836	32.237	2.93098	3.54141	11.1311	0	0	0.438296	30.2394	17.2879	14.6416	14.4671	16.4579	17.7667	8.88384	4.69887	2.33585	2.36904
evm.TU.Contig78.4	1	4	9	609	65	364	228	63	222	33	50	86	0	3	54	400	244	300	157	134	301	87	49	39	0.0906444	0.330975	0.743687	47.1421	4.2636	34.1418	16.8116	5.12493	16.9835	2.69224	4.00979	6.62687	0	0.24695	4.51742	32.1287	19.3673	23.6639	13.0243	11.0771	24.7231	7.07286	3.94387	3.28955	19.2453
evm.TU.Contig555.420	77	66	59	331	347	265	175	139	120	124	124	68	70	93	37	179	84	202	119	133	335	51	53	52	4.85193	3.79631	3.38909	17.8116	15.8225	17.2788	8.97004	7.8604	6.38173	7.03241	6.91283	3.64252	3.7526	5.32173	2.1517	9.99468	4.6349	11.0764	6.86252	7.64282	19.1278	2.88223	2.96541	3.049	64.0043
evm.TU.Contig81.823	181	192	234	102	166	71	247	170	127	143	172	118	222	127	100	103	78	80	115	124	118	118	62	88	8.24839	7.98705	9.72105	3.96955	5.4742	3.34806	9.1563	6.95258	4.88459	5.86524	6.93473	4.57132	8.60705	5.25583	4.20578	4.1593	3.11259	3.17253	4.79625	5.15336	4.87269	4.82289	2.50881	3.73168	142.823
evm.TU.Contig600.196	165	454	304	34	84	296	22	4	14	95	162	154	73	391	127	122	110	169	29	24	23	76	93	102	11.1943	28.1166	18.8015	1.96989	4.12396	20.7802	1.21414	0.243545	0.801631	5.8009	9.72386	8.88184	4.21354	24.09	7.95194	7.33441	6.53496	9.97757	1.80063	1.48492	1.41396	4.62447	5.6025	6.43938	191.719
evm.TU.Contig294.89	78	136	172	128	107	122	224	102	175	137	160	92	45	94	86	130	108	276	87	95	76	168	98	126	3.89423	6.19812	7.82821	5.45742	3.86574	6.30277	9.0972	4.57018	7.37392	6.15611	7.06737	3.90466	1.91139	4.26188	3.96261	5.75125	4.72159	11.9912	3.9752	4.32543	3.43825	7.52265	4.34449	5.85367	73.2619
evm.TU.Contig477.640	366	1013	591	22	46	23	34	6	9	127	109	79	48	182	101	25	37	33	4	7	15	21	6	5	17.636	44.5576	25.9605	0.905298	1.60398	1.14681	1.33269	0.259463	0.366011	5.50783	4.64681	3.23604	1.96775	7.96409	4.49154	1.06746	1.56119	1.38375	0.176397	0.307606	0.654946	0.907553	0.256717	0.224191	107.705
evm.TU.Contig7.49	124	107	139	139	240	122	139	71	90	97	153	157	99	120	68	116	108	140	135	77	71	121	117	123	7.24261	5.70495	7.40108	6.93329	10.144	7.37358	6.60421	3.72167	4.43659	5.09923	7.90635	7.79547	4.91948	6.36505	3.66555	6.00377	5.52376	7.11585	7.2164	4.1015	3.75775	6.33861	6.06799	6.68513	92.0971
evm.TU.Contig154.314	19	12	12	425	510	563	91	104	7	42	125	72	7	29	5	212	54	133	48	191	56	13	65	14	0.839335	0.483902	0.483248	16.0333	16.3033	25.7356	3.27006	4.12308	0.260984	1.6699	4.88543	2.70386	0.263082	1.16339	0.203849	8.2987	2.08888	5.1128	1.9406	7.69474	2.24164	0.515063	2.54965	0.575494	13.2091
evm.TU.Contig12.524	77	51	50	301	287	431	141	67	32	108	216	57	78	137	38	99	62	108	48	108	76	43	63	28	6.98916	4.2257	4.13725	23.332	18.8512	40.4815	10.4109	5.45778	2.45142	8.82302	17.346	4.39823	6.02337	11.2928	3.18328	7.96273	4.92792	8.53067	3.98739	8.93999	6.25093	3.50056	5.07763	2.36496	81.0148
evm.TU.Contig96.140	200	119	257	82	208	8	129	60	121	107	117	121	159	72	65	160	79	108	146	86	71	77	63	50	10.2001	5.54008	11.9485	3.57141	7.67645	0.422191	5.35176	2.7462	5.20827	4.91154	5.27924	5.24601	6.89894	3.33468	3.05946	7.23081	3.52809	4.79318	6.81461	3.99992	3.28117	3.52209	2.85299	2.37288	93.9216
evm.TU.Contig256.36	182	191	242	45	126	25	139	58	120	157	122	117	100	74	49	104	148	141	52	104	39	112	98	117	7.92909	7.59591	9.61113	1.67423	3.97233	1.12703	4.92606	2.2677	4.41232	6.15617	4.70243	4.33318	3.70649	2.92773	1.97017	4.01493	5.64613	5.3456	2.07333	4.13204	1.53962	4.37628	3.79109	4.74317	71.1018
evm.TU.Contig341.341	20	64	41	127	85	94	66	198	110	42	179	229	43	24	83	181	62	116	147	179	126	84	186	69	1.61048	4.70434	3.00965	8.73332	4.95297	7.83244	4.32316	14.3086	7.47568	3.04392	12.7523	15.6758	2.9458	1.75502	6.16821	12.915	4.37173	8.12845	10.8332	13.1449	9.19373	6.06651	13.2991	5.17017	49.0049
evm.TU.Contig66.733	157	140	113	75	188	11	204	107	155	158	107	123	87	19	100	116	124	128	45	48	38	112	123	57	3.62969	2.95456	2.38153	1.48075	3.14521	0.263152	3.83648	2.22004	3.02437	3.28765	2.18859	2.41738	1.7112	0.398906	2.13367	2.3764	2.51032	2.57517	0.952129	1.01202	0.796068	2.32232	2.525	1.22624	66.604
evm.TU.Contig280.250	1	3	1	320	117	997	10	73	4	9	11	18	23	176	38	189	29	79	27	99	82	6	109	27	0.0353876	0.0969095	0.0322595	9.67056	2.99612	36.5082	0.287861	2.31835	0.119466	0.28665	0.344393	0.541492	0.692451	5.65601	1.24105	5.92659	0.89864	2.43278	0.874435	3.19495	2.62943	0.190431	3.42502	0.889089	76.7952
evm.TU.Contig264.225	88	62	153	106	187	26	123	102	125	80	112	99	83	106	26	119	56	69	231	86	58	112	49	130	3.1872	2.04981	5.05155	3.27856	4.90106	0.974416	3.6238	3.31538	3.82094	2.60781	3.58885	3.04811	2.5575	3.48641	0.869073	3.81914	1.77604	2.17471	7.65688	2.84056	1.90349	3.63814	1.57583	4.38128	68.4616
evm.TU.Contig541.14	92	159	142	48	70	51	119	79	75	152	106	110	107	251	180	64	65	62	69	35	69	56	65	68	4.62802	7.30127	6.51182	2.06205	2.54816	2.65474	4.86953	3.56649	3.18421	6.88192	4.71763	4.70402	4.57933	11.4664	8.35672	2.85285	2.86324	2.71409	3.17665	1.60566	3.14523	2.52656	2.9034	3.18308	174.799
evm.TU.Contig96.619	64	81	105	141	167	87	72	40	86	87	78	83	19	38	35	257	83	105	99	82	69	74	41	36	2.03279	2.34851	3.04025	3.82458	3.83842	2.85942	1.86028	1.1402	2.3054	2.48709	2.19189	2.2411	0.513426	1.09608	1.02598	7.23334	2.30849	2.9022	2.87781	2.37523	1.98591	2.10805	1.15633	1.06401	29.9431
evm.TU.Contig421.298	62	172	97	127	84	44	122	103	87	34	140	125	30	75	11	94	67	56	90	71	120	32	49	14	2.87478	7.28006	4.10007	5.02883	2.81847	2.1111	4.60156	4.28604	3.40459	1.41889	5.74316	4.9271	1.18343	3.15806	0.470718	3.86218	2.72035	2.25957	3.81916	3.00227	5.04185	1.33075	2.01741	0.604048	37.1477
evm.TU.Contig84.516	124	180	251	14	97	9	47	20	52	171	239	103	22	51	9	34	111	83	11	21	19	61	16	37	7.57607	10.039	13.9799	0.730468	4.28861	0.568996	2.33589	1.09663	2.68138	9.40323	12.9191	5.34969	1.14355	2.82969	0.507482	1.84074	5.93858	4.41291	0.615075	1.17009	1.05189	3.34262	0.868016	2.10356	26.2644
evm.TU.Contig96.89	31	44	17	47	49	30	68	37	151	56	41	112	64	20	139	69	66	87	130	84	57	92	111	122	1.86314	2.41396	0.931405	2.4123	2.13109	1.86573	3.32448	1.99568	7.65938	3.02921	2.18011	5.72229	3.27245	1.09159	7.70999	3.67472	3.47347	4.55017	7.15055	4.60406	3.10423	4.95913	5.92368	6.82297	73.0892
evm.TU.Contig46.20	76	111	88	30	86	78	45	84	60	77	78	120	85	77	53	27	38	24	48	75	67	72	80	103	4.59683	6.12862	4.85216	1.54959	3.76414	4.88185	2.21407	4.55964	3.06288	4.19175	4.17398	6.17015	4.37396	4.22944	2.95854	1.44711	2.01264	1.26323	2.65705	4.137	3.67212	3.90582	4.29656	5.79714	68.8361
evm.TU.Contig277.19	41	154	22	141	27	47	88	21	139	23	58	163	5	8	31	183	137	35	44	97	59	54	10	9	2.83672	9.72632	1.3876	8.33112	1.35182	3.36493	4.95277	1.30394	8.11674	1.43225	3.55036	9.58716	0.294316	0.502655	1.97948	11.2196	8.30025	2.1073	2.78612	6.12045	3.69898	3.3509	0.614354	0.579438	14.6075
evm.TU.Contig66.1119	39	45	65	63	121	34	66	29	32	53	82	74	60	59	36	45	35	48	37	44	19	110	112	90	3.12526	3.29176	4.74834	4.31135	7.01664	2.81933	4.30227	2.08558	2.16424	3.82258	5.81361	5.04107	4.09057	4.29359	2.66244	3.19541	2.45599	3.34725	2.71354	3.21553	1.37966	7.90586	7.96939	6.71112	49.6147
evm.TU.Contig21.337	23	54	25	57	86	81	46	39	65	37	65	49	19	29	59	49	18	37	61	84	33	72	66	59	0.696526	1.49279	0.690171	1.47413	1.88465	2.53828	1.13318	1.05994	1.66133	1.00849	1.74154	1.26146	0.489524	0.797543	1.64899	1.31492	0.477331	0.975071	1.69065	2.31989	0.905565	1.95559	1.77476	1.66262	35.156
evm.TU.Contig411.22	8	19	18	25	12	10	0	424	2	2	19	24	14	60	38	75	34	15	75	134	19	24	26	29	0.499824	1.08362	1.0252	1.33388	0.542539	0.646505	0	23.7739	0.105461	0.112465	1.05025	1.2747	0.74416	3.40428	2.19113	4.15223	1.86013	0.815537	4.28847	7.63503	1.07567	1.34485	1.4424	1.686	36.5408
evm.TU.Contig383.343	13	82	50	68	88	30	56	84	96	39	64	116	0	10	2	54	35	40	24	103	10	10	4	4	0.947881	5.45782	3.32344	4.23419	4.64318	2.26348	3.32148	5.49663	5.90766	2.55938	4.12859	7.19014	0	0.662151	0.134585	3.48896	2.23468	2.53802	1.60153	6.84899	0.660704	0.653951	0.258974	0.271395	3.90969
evm.TU.Contig81.1175	5	40	98	49	36	22	8	337	9	5	64	41	1	51	10	62	31	23	21	101	11	18	11	13	0.471918	3.44628	8.43198	3.94951	2.45879	2.14864	0.614213	28.5452	0.716923	0.424742	5.34426	3.28965	0.0802985	4.37133	0.87107	5.18538	2.5621	1.88908	1.81397	8.69354	0.940775	1.52372	0.921881	1.14175	20.1777
evm.TU.Contig298.100	4	17	2	18	59	31	35	108	66	58	66	24	58	71	39	31	7	23	53	39	130	19	40	56	0.344237	1.33549	0.156904	1.32288	3.67428	2.7606	2.45018	8.34118	4.79375	4.49246	5.02519	1.75581	4.24655	5.54884	3.09755	2.36402	0.527513	1.72247	4.17433	3.06084	10.1376	1.46651	3.05663	4.48453	53.8975
evm.TU.Contig298.96	1	10	8	24	41	10	35	102	64	14	24	33	90	89	50	40	36	39	39	50	140	7	20	46	0.0714227	0.651975	0.520874	1.46386	2.11906	0.739062	2.03347	6.53797	3.85789	0.89996	1.51656	2.00364	5.46877	5.77262	3.29581	2.53156	2.25152	2.42396	2.54926	3.25675	9.06067	0.448404	1.26839	3.05721	73.2299
evm.TU.Contig383.56	30	19	30	63	82	53	37	38	28	28	41	37	62	65	30	38	23	31	24	43	35	36	39	31	1.63428	0.944828	1.48982	2.93087	3.23252	2.98762	1.6396	1.85778	1.28735	1.37285	1.97606	1.71347	2.87347	3.21562	1.50828	1.83434	1.09716	1.46957	1.19655	2.13625	1.7277	1.7589	1.88649	1.57144	50.1357
evm.TU.Contig631.6	16	19	24	39	97	3	86	25	9	20	31	23	174	89	46	14	21	27	46	9	15	18	7	66	0.702134	0.761111	0.960104	1.46156	3.08031	0.136228	3.06995	0.98457	0.333331	0.789931	1.20357	0.858019	6.49621	3.5468	1.86301	0.544403	0.806969	1.03107	1.84744	0.360181	0.596469	0.708447	0.272762	2.6951	97.5765
evm.TU.Contig294.75	5	32	13	61	96	45	53	22	60	6	66	86	1	2	22	78	70	72	22	52	19	7	9	12	0.206317	1.20534	0.489008	2.14955	2.86655	1.92142	1.77899	0.814695	2.08954	0.222831	2.40946	3.01671	0.0351056	0.074945	0.837809	2.85202	2.52931	2.58537	0.83081	1.95681	0.710421	0.259059	0.329757	0.460763	8.39808
evm.TU.Contig298.101	13	23	8	78	52	11	27	76	44	46	82	41	43	36	39	25	36	22	46	17	27	9	33	26	0.809167	1.30682	0.453933	4.1461	2.34218	0.708487	1.36707	4.24536	2.31143	2.57698	4.51564	2.16944	2.27706	2.0349	2.24035	1.37888	1.96216	1.19163	2.62039	0.964989	1.52284	0.502426	1.82387	1.50591	37.9932
evm.TU.Contig180.122	39	51	51	42	41	19	29	28	36	36	75	55	16	34	24	25	37	41	31	14	15	32	25	29	1.55418	1.85525	1.85274	1.42935	1.18234	0.783495	0.940087	1.00139	1.2108	1.29122	2.64429	1.86324	0.542461	1.23045	0.882684	0.882816	1.29115	1.42183	1.13061	0.508797	0.541658	1.14373	0.884633	1.07539	24.0093
evm.TU.Contig374.15	35	26	11	10	21	34	30	14	29	30	26	30	37	25	33	51	48	54	40	11	25	34	42	51	1.39144	0.943547	0.398653	0.339505	0.604139	1.39868	0.970174	0.499494	0.973032	1.07344	0.914492	1.01388	1.25143	0.902573	1.21078	1.79663	1.67099	1.86816	1.45535	0.398811	0.9006	1.2123	1.48262	1.88667	30.5708
evm.TU.Contig471.226	29	54	36	25	26	32	26	24	34	27	13	34	15	18	17	15	76	89	26	12	25	31	11	20	1.31434	2.23408	1.48737	0.967613	0.85272	1.50074	0.958554	0.976177	1.30054	1.10137	0.521273	1.30996	0.578379	0.74085	0.711076	0.602413	3.01621	3.51015	1.07844	0.495988	1.02671	1.26011	0.442679	0.843474	16.1618
evm.TU.Contig600.195	81	315	101	4	13	3	10	4	2	17	54	16	11	25	10	0	1	5	1	13	2	12	1	2	8.0698	28.6472	9.17289	0.340321	0.937224	0.309274	0.81042	0.357638	0.168167	1.52435	4.75973	1.35509	0.932354	2.26185	0.919462	0	0.0872399	0.433484	0.0911782	1.18114	0.180553	1.07224	0.0884633	0.185412	14.8319
evm.TU.Contig21.61	16	16	26	40	142	32	35	56	5	33	53	21	12	10	13	25	28	41	13	23	13	12	7	13	0.846592	0.772803	1.25411	1.80745	5.43707	1.75206	1.50645	2.65919	0.223284	1.57155	2.48108	0.944589	0.54019	0.480508	0.634825	1.17216	1.29733	1.88783	0.629522	1.10984	0.623296	0.56947	0.32888	0.640072	11.3039
evm.TU.Contig21.294	33	35	21	31	43	13	28	22	17	24	18	27	28	13	28	34	32	41	31	25	8	40	60	22	2.24115	2.1698	1.30012	1.79792	2.11324	0.913578	1.54685	1.34087	0.974406	1.46699	1.08154	1.5588	1.6178	0.801766	1.75498	2.04611	1.90303	2.42307	1.92678	1.54837	0.492316	2.43642	3.61821	1.39031	22.2456
evm.TU.Contig294.282	22	396	85	1	0	3	2	0	3	22	5	10	3	15	41	1	2	0	0	5	0	1	0	1	1.30567	21.4536	4.59871	0.0506828	0	0.184237	0.0965545	0	0.150267	1.17515	0.262537	0.504521	0.151475	0.80844	2.24569	0.0525899	0.103939	0	0	0.270619	0	0.0532286	0	0.0552257	19.6429
evm.TU.Contig421.262	5	2	0	31	55	28	1	70	6	1	13	13	13	9	15	8	1	10	29	23	111	13	64	70	0.863954	0.315461	0	4.57439	6.87711	5.00638	0.140557	10.8549	0.874995	0.155518	1.98735	1.90956	1.91106	1.41224	2.39204	1.22491	0.151307	1.50365	4.58598	3.62433	17.3796	2.01465	9.81943	11.2551	11.9635
evm.TU.Contig45.300	35	26	17	42	62	45	21	28	5	17	17	23	2	3	3	37	25	26	10	39	21	14	12	8	4.13959	2.80709	1.83293	4.24218	5.30644	5.5074	2.02042	2.97203	0.499106	1.80966	1.77889	2.31252	0.201247	0.322223	0.327466	3.87778	2.5892	2.67601	1.08244	4.20661	2.25063	1.48509	1.26025	0.880461	2.59706
evm.TU.Contig294.74	11	62	35	21	11	20	17	67	51	4	8	29	1	13	21	1	9	10	15	30	3	23	3	6	0.686612	3.53268	1.99156	1.11941	0.49686	1.29179	0.863178	3.75318	2.68672	0.224718	0.441794	1.53881	0.0531043	0.7369	1.20975	0.0553109	0.491925	0.54318	0.856886	1.70773	0.169682	1.2876	0.166274	0.348498	11.6158
evm.TU.Contig256.16	4	14	10	56	14	14	13	5	12	27	4	34	0	10	10	43	18	21	2	10	19	21	3	42	0.282047	0.901124	0.64279	3.37211	0.714353	1.02149	0.745656	0.316402	0.71413	1.7135	0.249536	2.03803	0	0.640338	0.650757	2.68672	1.1114	1.28857	0.129064	0.643044	1.21398	1.32806	0.187832	2.75577	6.61717
evm.TU.Contig383.344	9	51	5	22	4	5	17	34	59	10	14	14	0	8	4	9	9	11	36	29	7	16	7	7	0.399174	2.06483	0.202161	0.833286	0.128382	0.229475	0.613341	1.35334	2.20854	0.39919	0.549363	0.527858	0	0.322223	0.163733	0.353716	0.349543	0.424559	1.46129	1.173	0.281329	0.636466	0.275679	0.288901	3.94
evm.TU.Contig437.103	3	11	21	6	12	7	17	3	2	1	10	21	19	47	56	16	18	14	34	6	16	6	12	22	0.204369	0.684038	1.30412	0.349056	0.591557	0.493442	0.942051	0.183409	0.114989	0.0613129	0.602704	1.21613	1.10118	2.90762	3.52077	0.96584	1.07375	0.829939	2.11975	0.372754	0.987664	0.366589	0.725872	1.39459	39.9598
evm.TU.Contig477.188	13	18	14	4	6	12	2	3	9	20	27	22	21	10	14	19	31	14	2	6	10	11	7	18	0.601514	0.760273	0.590524	0.158057	0.200898	0.574551	0.0752775	0.124575	0.351462	0.832898	1.10529	0.865355	0.826671	0.420194	0.597843	0.77902	1.25604	0.56371	0.0846927	0.253182	0.419275	0.456489	0.287598	0.775008	14.396
evm.TU.Contig45.256	4	3	2	8	10	2	6	11	22	0	5	32	8	5	10	6	9	14	31	33	10	11	34	15	0.134793	0.092283	0.0614389	0.230222	0.243853	0.0697398	0.164471	0.332664	0.625695	0	0.149069	0.916696	0.229354	0.153011	0.311001	0.179164	0.265574	0.410544	0.956051	1.01414	0.305353	0.332456	1.01735	0.470358	7.44841
evm.TU.Contig63.243	3	2	1	36	59	8	45	21	15	16	2	5	0	3	2	5	3	6	7	10	16	1	5	0	0.155148	0.0944169	0.0471446	1.58993	2.208	0.428115	1.89309	0.974655	0.654712	0.744739	0.0915095	0.219819	0	0.140894	0.0954578	0.229133	0.135858	0.270024	0.331312	0.471633	0.749793	0.0463831	0.229605	0	1.64672
evm.TU.Contig383.374	6	11	10	13	15	7	33	17	8	19	12	25	2	6	3	4	6	15	10	5	5	9	10	5	0.385392	0.644969	0.585543	0.713092	0.697213	0.465259	1.72424	0.979957	0.433686	1.09841	0.681936	1.36509	0.109293	0.349985	0.17784	0.227669	0.337474	0.838432	0.587848	0.292887	0.291017	0.518476	0.570345	0.298849	3.56691
evm.TU.Contig298.93	0	0	0	33	17	4	3	59	5	0	27	7	0	5	0	3	0	3	0	4	77	0	0	3	0	0	0	3.18009	1.38818	0.467067	0.275377	5.97493	0.476188	0	2.69556	0.671493	0	0.512379	0	0.299977	0	0.294592	0	0.411636	7.87339	0	0	0.315012	1.61641
evm.TU.Contig341.321	8	2	9	5	4	3	7	34	10	6	3	13	6	4	12	10	2	8	16	12	14	20	11	20	0.465626	0.10626	0.477525	0.248524	0.168473	0.180681	0.331419	1.77596	0.491225	0.314309	0.154482	0.64322	0.297104	0.211424	0.644591	0.51575	0.101933	0.405193	0.852276	0.636952	0.738366	1.04403	0.568493	1.0832	7.19008
evm.TU.Contig7.270	7	10	4	3	20	3	31	13	8	5	8	6	11	8	6	1	4	29	22	11	15	0	2	2	0.774103	1.00947	0.403244	0.283317	1.60049	0.343294	2.78866	1.29018	0.746662	0.497656	0.782711	0.564054	1.03491	0.80341	0.612362	0.0979925	0.387345	2.79077	2.22657	1.10936	1.5031	0	0.196389	0.205808	7.98238
evm.TU.Contig44.244	5	1	3	13	9	1	29	23	36	10	6	9	0	1	0	6	7	7	13	12	14	2	4	1	0.55018	0.100445	0.300928	1.2216	0.716637	0.113862	2.59576	2.27127	3.34326	0.990361	0.584113	0.841872	0	0.0999266	0	0.58503	0.674481	0.670282	1.30916	1.20419	1.39591	0.197378	0.390823	0.102392	0.323283
evm.TU.Contig294.73	0	5	0	33	11	7	12	2	32	1	2	24	0	2	1	25	10	8	14	9	3	0	4	1	0	0.201895	0	1.2466	0.352108	0.320408	0.431792	0.0793957	1.19466	0.0398125	0.0782711	0.902487	0	0.080341	0.0408241	0.979925	0.387345	0.307947	0.566764	0.363063	0.120248	0	0.157111	0.0411615	0.984999
evm.TU.Contig81.1077	0	0	9	6	0	1	0	36	1	0	1	5	0	1	1	9	0	1	11	106	9	1	0	5	0	0	0.762436	0.476163	0	0.0961609	0	3.00236	0.0784309	0	0.0822175	0.394996	0	0.0843918	0.085765	0.74112	0	0.0808684	0.935534	8.98335	0.757866	0.0833467	0	0.432369	0.661717
evm.TU.Contig21.520	8	6	14	2	10	2	9	6	5	12	7	14	12	17	2	8	6	6	7	5	0	6	5	23	0.375133	0.256827	0.598454	0.0800896	0.339327	0.0970443	0.343297	0.252495	0.197879	0.506449	0.290405	0.558075	0.478726	0.723921	0.0865529	0.332413	0.246368	0.244834	0.300405	0.213818	0	0.252337	0.208186	1.00359	9.84415
evm.TU.Contig66.1117	3	19	3	8	2	4	17	0	2	20	9	19	1	3	2	34	18	15	1	2	1	4	1	0	0.289745	1.67511	0.264133	0.659836	0.139781	0.399761	1.3356	0	0.163027	1.73854	0.769039	1.55998	0.0821686	0.263126	0.178271	2.90982	1.52232	1.2607	0.0883911	0.176159	0.0875168	0.34649	0.0857592	0	1.95267
evm.TU.Contig481.35	5	3	3	12	8	6	1	14	1	7	3	3	14	11	7	2	6	12	4	5	8	9	7	9	0.343791	0.188296	0.188041	0.704623	0.398049	0.426895	0.0559316	0.863891	0.0580307	0.433193	0.182497	0.175354	0.818961	0.686853	0.4442	0.121856	0.361254	0.718011	0.251708	0.313526	0.498438	0.555012	0.427374	0.575835	10.2085
evm.TU.Contig421.538	5	8	3	0	1	1	1	2	3	5	5	7	4	11	8	10	13	6	18	8	15	1	4	2	0.224921	0.328507	0.123023	0	0.0325523	0.0465484	0.0365925	0.0807414	0.113898	0.202437	0.198994	0.267687	0.153084	0.449365	0.332128	0.398614	0.512083	0.234875	0.741047	0.328192	0.611431	0.0403455	0.159774	0.0837184	7.48741
evm.TU.Contig81.569	21	22	16	4	4	0	8	12	6	1	8	1	0	3	0	0	0	0	6	11	1	1	0	3	1.44243	1.37941	1.00185	0.234631	0.198819	0	0.44699	0.739711	0.347824	0.0618207	0.486156	0.0583907	0	0.18713	0	0	0	0	0.377172	0.689043	0.0622402	0.0616041	0	0.191746	0.969848
evm.TU.Contig533.8	3	20	1	0	12	0	0	0	0	3	4	3	25	16	12	0	2	2	3	2	0	1	0	0	0.16316	0.992925	0.0495791	0	0.472276	0	0	0	0	0.146849	0.19247	0.138702	1.15676	0.79024	0.602323	0	0.0952488	0.0946558	0.149323	0.0991975	0	0.0487783	0	0	16.8826
evm.TU.Contig63.244	11	6	13	0	2	0	1	22	0	5	3	8	2	2	0	5	4	0	0	0	2	8	3	0	1.23497	0.614908	1.3305	0	0.162486	0	0.0913265	2.21663	0	0.505235	0.297986	0.763525	0.191032	0.203911	0	0.497424	0.393244	0	0	0	0.203465	0.805544	0.299069	0	1.25848
evm.TU.Contig44.245	0	1	1	9	3	1	7	37	1	0	1	3	0	4	0	10	3	0	3	0	3	1	0	0	0	0.026741	0.0267049	0.225153	0.0635956	0.030313	0.166807	0.972729	0.0247239	0	0.0259176	0.0747092	0	0.106412	0	0.259583	0.076956	0	0.08043	0	0.0796345	0.0262735	0	0	1.29313
evm.TU.Contig180.366	5	4	4	7	7	0	3	0	3	0	3	4	5	2	8	0	5	7	3	2	2	1	2	1	0.295949	0.216123	0.215831	0.35383	0.299824	0	0.144444	0	0.149865	0	0.157101	0.201268	0.251783	0.107504	0.437011	0	0.259151	0.360553	0.16251	0.107958	0.107269	0.0530861	0.105114	0.0550779	4.88382
evm.TU.Contig256.13	4	3	4	4	6	0	0	1	0	3	1	2	5	8	0	2	5	3	7	3	1	4	4	7	0.427386	0.292601	0.389607	0.364982	0.46391	0	0	0.0958885	0	0.288497	0.0945303	0.18166	0.454507	0.776242	0	0.189358	0.467808	0.278937	0.684497	0.292321	0.0968181	0.383314	0.379495	0.695968	4.11604
evm.TU.Contig66.1116	1	9	0	4	0	0	11	1	2	8	7	3	0	1	10	4	4	0	4	2	3	1	0	0	0.0521223	0.428214	0	0.178047	0	0	0.46639	0.0467767	0.0879806	0.375295	0.322799	0.132927	0	0.0473337	0.481038	0.184746	0.182566	0	0.190808	0.0950675	0.141691	0.0467475	0	0	3.70763
evm.TU.Contig55.154	0	5	4	0	0	0	3	2	6	1	0	0	10	2	9	2	4	3	10	4	2	3	1	2	0	0.136231	0.108838	0	0	0	0.0728394	0.0535733	0.151146	0.026864	0	0	0.253935	0.0542112	0.24792	0.0528975	0.104547	0.0779218	0.273165	0.108881	0.0540927	0.0803098	0.0265032	0.0555486	6.75204
evm.TU.Contig298.94	0	0	0	2	0	1	6	11	0	4	3	1	0	6	1	0	0	7	2	5	7	2	3	3	0	0	0	0.239086	0	0.14485	0.683215	1.38189	0	0.503956	0.37154	0.118999	0	0.762731	0.12919	0	0	0.852701	0.256222	0.638296	0.887908	0.251095	0.37289	0.390774	2.27813
evm.TU.Contig63.37	11	10	23	0	0	1	0	4	0	0	2	0	0	4	1	0	1	0	0	1	2	3	0	1	0.618009	0.512857	1.17798	0	0	0.0581362	0	0.201683	0	0	0.0994129	0	0	0.204084	0.0518511	0	0.0491971	0	0	0.0512366	0.101819	0.151167	0	0.0522797	1.63156
evm.TU.Contig365.30	0	0	0	4	4	0	4	4	7	1	2	6	0	1	3	2	0	0	15	1	1	0	0	7	0	0	0	0.153455	0.130033	0	0.146172	0.161264	0.265401	0.0404325	0.07949	0.229135	0	0.040796	0.12438	0.0796148	0	0	0.616703	0.0409685	0.0407069	0	0	0.292618	1.33859
evm.TU.Contig298.98	0	0	0	0	3	0	1	4	2	1	0	0	5	3	2	3	1	0	1	2	8	0	9	10	0	0	0	0	0.167884	0	0.0629067	0.277607	0.130535	0.0696023	0	0	0.328962	0.210684	0.142742	0.205579	0.0677177	0	0.0707747	0.14105	0.560597	0	0.618006	0.719607	3.1765
evm.TU.Contig797.298	3	2	5	0	1	2	9	3	2	0	3	0	1	0	1	4	2	5	0	0	0	2	3	2	0.166156	0.101116	0.252448	0	0.0400791	0.114622	0.405481	0.149115	0.0934886	0	0.147003	0	0.0471201	0	0.0511154	0.196312	0.0969979	0.240985	0	0	0	0.0993482	0.147537	0.103076	0.644391
evm.TU.Contig7.48	0	0	0	5	2	2	0	3	8	0	0	2	3	1	1	2	1	0	0	3	1	8	1	3	0	0	0	0.344668	0.116824	0.167053	0	0.217324	0.545009	0	0	0.137239	0.206021	0.0733039	0.0744966	0.143055	0.0706834	0	0	0.220841	0.0731436	0.579169	0.0716747	0.225337	1.57959
evm.TU.Contig7.46	3	1	1	0	4	2	1	1	1	2	1	2	1	4	1	5	1	1	1	2	2	4	2	2	0.242159	0.0736842	0.0735846	0	0.233648	0.167053	0.0656618	0.0724413	0.0681261	0.145301	0.0714152	0.137239	0.0686738	0.293215	0.0744966	0.357637	0.0706834	0.0702433	0.0738743	0.147227	0.146287	0.289584	0.143349	0.150225	1.93752
evm.TU.Contig21.286	0	3	0	3	3	7	4	0	3	0	3	3	1	0	0	2	3	1	0	2	0	2	1	1	0	0.206015	0	0.192733	0.163315	0.544912	0.24478	0	0.190475	0	0.199671	0.191855	0.0640021	0	0	0.133323	0.197625	0.0654649	0	0.137212	0	0.134942	0.0667989	0.0700026	0.305956
evm.TU.Contig179.45	0	2	0	0	0	3	0	0	1	0	0	2	0	0	11	0	0	0	4	0	6	5	4	2	0	0.0969095	0	0	0	0.164781	0	0	0.0447997	0	0	0.0902487	0	0	0.538878	0	0	0	0.194319	0	0.288595	0.238038	0.188533	0.0987877	3.72278
evm.TU.Contig673.3	0	1	4	1	0	0	0	1	2	0	1	3	1	1	7	3	0	5	0	0	0	0	0	7	0	0.0465911	0.186112	0.0435872	0	0	0	0.0458052	0.0861533	0	0.0451564	0.130166	0.0434229	0.0463506	0.329733	0.135682	0	0.222077	0	0	0	0	0	0.332459	2.99828
evm.TU.Contig294.72	0	0	0	0	0	0	0	0	0	0	2	0	0	6	3	2	1	0	3	7	4	0	0	0	0	0	0	0	0	0	0	0	0	0	0.144946	0	0	0.446339	0.226801	0.145174	0.0717306	0	0.224906	0.52293	0.296909	0	0	0	2.955
evm.TU.Contig230.88	0	0	3	3	9	0	2	2	0	0	7	0	0	0	0	0	0	1	0	0	0	0	0	0	0	0	0.206439	0.193391	0.491618	0	0.122808	0.135488	0	0	0.46749	0	0	0	0	0	0	0.0656883	0	0	0	0	0	0	0
evm.TU.Contig66.278	2	3	0	1	0	1	3	0	1	1	3	0	0	1	0	0	0	2	0	5	2	2	0	0	0.0860035	0.117761	0	0.0367229	0	0.044497	0.10494	0	0.0362927	0.038703	0.114135	0	0	0.039051	0	0	0	0.0748413	0	0.196081	0.0779314	0.0771349	0	0	0.323283
evm.TU.Contig81.1174	5	2	4	2	0	0	0	0	0	2	2	0	0	0	0	1	0	1	0	3	1	0	0	0	0.425877	0.155503	0.310586	0.145477	0	0	0	0	0	0.153322	0.150715	0	0	0	0	0.0754756	0	0.0741207	0	0.233031	0.0771811	0	0	0	0
evm.TU.Contig280.176	0	0	2	1	6	1	4	0	1	0	2	0	0	0	1	2	0	1	0	1	0	0	0	0	0	0	0.106867	0.050056	0.254495	0.0606527	0.190721	0	0.0494697	0	0.103716	0	0	0	0.0540956	0.103879	0	0.0510071	0	0.0534545	0	0	0	0	0.338434
evm.TU.Contig797.121	1	1	0	0	0	1	0	1	0	0	0	4	0	0	0	0	1	0	0	3	0	0	0	5	0.0996271	0.0909436	0	0	0	0.103091	0	0.0894096	0	0	0	0.338771	0	0	0	0	0.0872399	0	0	0.27257	0	0	0	0.463531	0
evm.TU.Contig906.33	0	0	0	0	1	0	4	0	0	3	0	0	2	0	0	0	1	1	0	2	1	0	0	0	0	0	0	0	0.0591314	0	0.265882	0	0	0.220636	0	0	0.139039	0	0	0	0.0715539	0.0711084	0	0.149041	0.0740444	0	0	0	0.611912
evm.TU.Contig447.103	0	0	0	2	0	0	1	0	1	0	1	1	1	0	1	1	0	1	1	0	3	0	0	0	0	0	0	0.0932731	0	0	0.044423	0	0.0460903	0	0.0483155	0.0464242	0.0464608	0	0.0504002	0.0483914	0	0.0475227	0.0499792	0	0.148454	0	0	0	0.644391
[truncated: 28 more columns]

[truncated: 1 more sheets: WRKY]
